# Supplementary material for: Association between the levels of physical activity and plantar pressure in 6-14-year-old children
Source: PeerJ. 2020 Feb 14;8:e8551. doi: 10.7717/peerj.8551 (PMC7025699; doi:10.7717/peerj.8551)
Supplement: Supplemental Information 1 [file peerj-08-8551-s001.xlsx]

## Sheet: Sheet1
Sex (1 girls, 2 boys)	Age	Height	Weight	Body-mass index	Force-time integral_left foot1	Force-time integral_left foot2	Force-time integral_left foot3	Force-time integral_left foot average	Force-time integral_right foot1	Force-time integral_right foot2	Force-time integral_right foot3	Force-time integral_right foot average	Pressure-time integral_left foot1	Pressure-time integral_left foot2	Pressure-time integral_left foot3	Pressure-time integral_left foot average	Pressure-time integral_right foot1	Pressure-time integral_right foot2	Pressure-time integral_right foot3	Pressure-time integral_right foot average	Contact area_left foot1	Contact area_left foot2	Contact area_left foot3	Contact area_left foot average	Contact area_right foot1	Contact area_right foot2	Contact area_right foot3	Contact area_right foot average	Contact time_left foot1	Contact time_left foot2	Contact time_left foot3	Contact time_left foot average	Contact time_right foot1	Contact time_right foot2	Contact time_right foot3	Contact time_right foot average	Peak pressure_left foot1	Peak pressure_left foot2	Peak pressure_left foot3	Peak pressure_left foot average	Peak pressure_right foot1	Peak pressure_right foot2	Peak pressure_right foot3	Peak pressure_right foot average	Mean pressure_left foot1	Mean pressure_left foot2	Mean pressure_left foot3	Mean pressure_left foot average	Mean pressure_right foot1
2	12	154.4	47.7	20.0089	213.4	208.6	213.9	211.97	218.2	231.4	205.5	218.37	106.4	102.65	98.75	102.6	93.55	85.95	89.3	89.6	129.25	127	127.25	127.83	142	137.5	135.25	138.25	590	590	600	593.33	610	600	570	593.33	275	295	280	283.33	260	235	255	250	86.26	86.76	83.43	85.48	80.79
2	10	147	35.8	16.5672	190	186.3	182.9	186.4	180.3	189.5	168.8	179.53	139.65	137.65	124.25	133.85	150.75	132.35	111.75	131.62	99.25	106.5	100.25	102	112.25	113.25	116.5	114	660	670	660	663.33	670	700	620	663.33	500	445	305	416.67	525	385	360	423.33	90.83	85.04	87.13	87.67	84.12
2	8	136	28.1	15.1925	115.6	112.5	119.5	115.87	109.4	106.6	113.4	109.8	139.2	143.05	105.1	129.12	97.7	90.9	111.35	99.98	85.75	91.5	96.75	91.33	83.25	86.5	86.25	85.33	520	520	540	526.67	530	510	540	526.67	430	415	285	376.67	275	260	405	313.33	79.34	78.1	73.18	76.87	67.9
2	12	164.1	44.6	16.5622	103.7	82.5	91.1	92.43	98.3	84.3	90.2	90.93	135	91.45	79.2	101.88	103	96	106.7	101.9	69.25	67.75	61.25	66.08	68.5	75.5	70	71.33	590	470	530	530	580	480	530	530	500	515	315	443.33	465	720	470	551.67	88.84	85.31	70.94	81.7	72.24
2	7	130	27.8	16.4497	172.1	143.8	147.9	154.6	157.5	150.6	153.5	153.87	169.2	137.55	151.3	152.68	171.4	131.75	156.35	153.17	96	92.5	91.5	93.33	85.75	91	94.25	90.33	730	610	650	663.33	700	640	670	670	835	495	680	670	830	390	565	595	116.29	86.42	98.21	100.31	106.36
2	14	181.4	63.2	19.2062	186.4	189.9	190.3	188.87	184.6	221.3	202.6	202.83	122.15	103.6	135.45	120.4	168.85	151.8	138.75	153.13	112	112.5	112.75	112.42	105.5	111.5	113.75	110.25	630	620	610	620	570	700	600	623.33	415	245	385	348.33	645	455	500	533.33	86.62	77.14	88.97	84.24	99.12
2	8				147.5	148	143.7	146.4	134	135.5	151	140.17	95.85	98	71.75	88.53	86.8	82.8	95.85	88.48	116.5	117.75	105	113.08	113.75	116.25	111	113.67	610	620	630	620	580	570	640	596.67	280	250	195	241.67	285	285	240	270	74.41	73	59.33	68.91	75.99
2	15	180.5	55.4	17.0042	206.7	212	265.7	228.13	203.5	247.3		225.4	138.8	136.8	167.1	147.57	167.65	156.1		161.88	125.25	126.5	121.25	124.33	120.25	129		124.63	650	670	810	710	630	720		675	370	340	325	345	515	405		460	78.11	76.32	81.9	80.01	77.39
2	9	138.5	33.8	17.6205	158.4	166.3	135.4	153.37	150.4	148.9	134.5	144.6	103.4	117.3	93.35	104.68	102.4	97.9	101.7	100.67	95.25	95	98.5	96.25	97.75	100.25	94.5	97.5	750	790	670	736.67	750	690	650	696.67	205	215	200	206.67	275	200	320	265	67.78	69.01	62.69	66.49	64.82
2	9	140.7	29.1	14.6996	364.2	335.5	346.5	348.73	357.4	346.1	362.6	355.37	175.55	167.75	171.15	171.48	168.25	162.55	168.8	166.53	113.25	126.75	122.5	120.83	128.5	129.5	124.75	127.58	760	690	720	723.33	740	710	750	733.33	355	390	375	373.33	345	315	320	326.67	107.02	108.02	103.56	106.2	109.11
2	10	139.4	34.6	17.8054	192.2	187.7	141.4	173.77	172.9	163.6	134.1	156.87	172.5	146.6	96.75	138.62	131.35	151.85	106.65	129.95	88.25	99	98.75	95.33	91.5	97	94.75	94.42	820	700	560	693.33	720	670	550	646.67	345	410	330	361.67	295	365	355	338.33	85.57	89.46	80.91	85.31	74.17
2	8				177.3	168.8	160.2	168.77	205.9	216.5	159.1	193.83	143.6	137.65	107.2	129.48	126.1	115.3	79.6	107	102	105.5	107.75	105.08	104	103.25	101.25	102.83	740	620	590	650	740	790	580	703.33	350	415	335	366.67	305	265	240	270	74.89	84.4	79.86	79.72	80.47
2	12	164.4	43.1	15.9468	109.7	111.2	119.9	113.6	117.4	100.7	111.9	110	94.85	94.2	125.65	104.9	116	101.45	133.4	116.95	79.5	85.25	84	82.92	86	81.25	92.75	86.67	560	570	610	580	650	570	590	603.33	485	405	565	485	480	530	615	541.67	86.16	80.23	93.45	86.61	76.57
2	13	171.8	49.7	16.8388	287.9	267	262.6	272.5	305.8	290.1	293.3	296.4	131.7	138.3	175.85	148.62	129.3	128.8	136.25	131.45	115.75	112.75	113.5	114	120.25	123.25	121.5	121.67	700	650	630	660	720	670	690	693.33	260	295	550	368.33	260	280	305	281.67	95.67	98.87	109.77	101.437	93.85
2	12	157	71.7	29.0884	139.2	135	136.3	136.83	150.6	133.5	128	137.37	108	116.85	121.85	115.57	114.95	107	105.55	109.17	101.25	104.75	104.25	103.42	106.25	103.5	109.5	106.42	590	560	540	563.33	640	550	520	570	315	355	425	365	295	365	445	368.33	78.2	78.27	84.71	80.39	70.06
2	8	128.7	29.6	17.8704	314.7	342.2	363.1	340	354.6	375.7	388	372.77	193.6	258.35	325.95	259.3	206.1	224.4	234.4	221.63	130.5	109.25	127.25	122.33	121	133	126.75	126.92	780	810	890	826.67	870	910	920	900	455	470	950	625	345	375	370	363.33	97.43	109.97	105.47	104.29	92.5
2	13	168.1	47.7	16.8804	137.9	120.3	121.8	126.67	135.7	116.1	116.7	122.83	75.2	70.4	82.85	76.15	76.55	71.5	76.1	74.72	105.25	110.25	115.25	110.25	103	102.75	106.75	104.17	610	520	510	546.67	600	490	520	536.67	265	370	475	370	330	385	285	333.33	67.14	74.94	77.94	73.34	68.82
2	9	135.5	30.1	16.3941	181.3	152.2	170	167.83	158.6	174	183.7	172.1	89.75	82.5	104.4	92.22	93.6	107.6	124.2	108.47	115.75	125.5	124.25	121.83	117	118	122	119	660	580	670	636.67	650	660	670	660	270	290	355	305	265	285	370	306.67	76.45	76.2	72.2	74.95	65.48
2	7	131.5	27.1	15.6718	152.9	158.8	155.4	155.7	155.8	156.9	177.1	163.27	93.25	87.85	104.1	95.07	85.45	98.2	103.15	95.6	114.5	107.25	110.5	110.75	113	111.25	117.25	113.83	650	710	740	700	660	700	750	703.33	335	205	270	270	245	240	235	240	66.27	59.84	57.41	61.17	61.14
2	8	138.4	40.3	21.0394	165.1	162.2	164	163.77	176	157.6	176.2	169.93	123.4	114.3	121.65	119.78	134.5	110.85	161.6	135.65	98.75	101	105.25	101.67	107.25	103.75	105	105.33	630	630	620	626.67	630	620	680	643.33	430	415	455	433.33	465	360	430	418.33	76.65	80.59	78.5	78.58	91.19
2	15	169.7	82.5	28.6477	140.6	163.8	171.8	158.73	165.3	162	162.7	163.33	136.1	171.55	132.05	146.57	143.65	172.65	146.6	154.3	98	99.5	98.25	98.58	102.75	101.75	97.5	100.67	610	660	650	640	640	670	650	653.33	585	770	415	590	540	585	370	498.33	89.29	101.03	84.49	91.6	93.33
2	12	162.7	43.2	16.3196	146.4	148.6	142.1	145.7	172.4	137.2	153.9	154.5	109.25	104.25	111.5	108.33	104.4	85.95	92.45	94.27	106.5	111.5	110.75	109.58	108.25	108.5	107.25	108	640	590	580	603.33	690	570	620	626.67	360	335	395	363.33	295	305	285	295	68.3	70.93	69.99	69.74	65.28
2	14	175.2	60.7	19.7752	223.2	221.2	217.6	220.67	242.6	233	234	236.53	134.45	104.05	109.35	115.95	129.8	149.4	128.35	135.85	124.75	121.75	126.5	124.33	133	133.75	132.25	133	670	660	650	660	720	690	680	696.67	300	260	370	310	325	375	495	398.33	95.05	85.99	91.56	90.87	88.52
2	7	136.6	30.9	16.5599	324.5	323.2	280.6	309.43	342.4	284	292.7	306.37	184.9	204.4	214.35	201.22	178.3	155.45	195.4	176.38	144.75	146.5	143.5	144.92	143.75	143	135	140.58	780	810	730	773.33	930	730	770	810	505	385	470	453.33	410	430	475	438.33	97.38	86.29	80.82	88.16	81.28
2	8	138.7	41.9	21.7802	393.3	386.8	366.5	382.2	396.4	397.7	365.2	386.43	159.75	159.8	149.35	156.3	155	159.9	145.55	153.48	139.25	147	139.75	142	133	136	127.25	132.08	720	710	680	703.33	700	740	680	706.67	325	380	365	356.67	330	315	340	328.33	97.18	98.16	93.52	95.35	104.61
2	8	142.7	34.2	16.7949	116	136.6	139.8	130.8	131.4	123.8	126.1	127.1	67	93.65	99.35	86.67	111.2	88.35	102	100.52	104.75	102	105.25	104	102.25	105.25	107.75	105.08	510	560	580	550	560	540	540	546.67	200	350	340	296.67	385	300	350	345	68.39	74.84	75.97	73.07	78.81
2	10	127.9	33.1	20.2342	267	282.1	274	274.37	281.8	250.7	272.8	268.43	157.7	166.4	160.95	161.68	141.7	137.6	143.7	141	139	149.5	146.75	145.08	153.75	150.5	155	153.08	600	610	600	603.33	620	590	600	603.33	505	525	490	506.67	400	360	450	403.33	103.06	105.39	104.29	104.25	93.49
2	12	161.1	66.8	25.7386	253.9	238.6	218	236.83	244.1	241.1		242.6	185.65	142.7	164.4	164.25	129.05	149.3		139.18	154.5	141.5	135.25	143.75	142.75	137.5		140.13	700	650	610	653.33	700	710		705	440	340	545	441.67	310	320		315	84.43	70.99	86.5	80.64	67.31
2	7	123	20.7	13.6823	148.9	146.7	146.2	147.27	140.4	135.4	129.8	135.2	117.65	102.65	109.6	109.97	116.8	118.6	111	115.47	104.5	104.75	99.25	102.83	104.75	97.75	94.5	99	660	640	630	643.33	630	590	570	596.67	290	295	355	313.33	355	375	440	390	67.58	69.25	76.84	71.22	73.58
2	10	148.7	36.7	16.5976	113.3	106.6	94.3	104.73	107.3	100.1	87.7	98.37	108.7	132.2	96.2	112.37	96.95	107.9	83.6	96.15	85.25	82	87.5	84.92	85	85.25	85.5	85.25	710	650	560	640	660	630	530	606.67	325	370	400	365	280	340	385	335	70.43	75.05	70.77	72.08	68.38
2	7				126.4	111.2	115.6	117.73	126.5	113.1	119.1	119.57	95.05	71.9	81.8	82.92	80.7	75.65	79.85	78.73	99.5	80	90	89.83	97.25	85.25	87.5	90	610	570	570	583.33	620	560	590	590	320	185	250	251.67	210	195	245	216.67	72.54	68.94	74.49	71.99	67.31
2	8				563.7	608	509.9	560.53	531.4	557.3	514.8	534.5	213.15	216.7	197.1	208.98	201.05	255.1	240.4	232.18	162.25	178.5	177	172.58	162.25	163.5	163.25	163	700	730	680	703.33	670	710	620	666.67	465	435	500	466.67	530	660	670	620	138.27	137.86	134.36	136.83	141.07
2	11	149.1	42.6	19.1626	117.4	128.3	125.1	123.6	134.8	117.5	119.7	124	125.15	98.2	97.35	106.9	110.5	104	87.05	100.52	68.75	63.75	71.5	68	68.5	68.25	76	70.92	680	750	710	713.33	780	700	690	723.33	365	265	250	293.33	215	215	200	210	81.62	70.43	70.8	74.28	66.09
2	14				161.8	166.5	162.9	163.73	162.4	167.6	169.5	166.5	128.6	139.2	126.5	131.43	139.3	120.15	120.45	126.63	103.5	111.25	106.75	107.17	103.25	105.75	105.25	104.75	550	600	550	566.67	550	570	580	566.67	495	440	460	465	615	410	425	483.33	97.48	87.06	94.92	93.15	104.78
2	12	145.5	32.2	15.21	154.2	144.1	134.4	144.23	157.3	140	149.2	148.83	80.05	82	77.65	79.9	85.65	80.05	86.4	84.03	115.75	127.75	131.75	125.08	125	125.75	129.5	126.75	540	510	490	513.33	550	450	520	506.67	235	275	275	261.67	230	340	260	276.67	72.53	71.62	68.51	70.89	71.75
2	9	142.4	45.1	22.2411	137.4	129.2	136.8	134.47	137	125	145	135.67	130.4	104.55	126.6	120.52	82.05	85.2	86.5	84.58	95.5	98	99.75	97.75	101.75	101.75	100.5	101.33	590	540	580	570	570	520	580	556.67	430	380	405	405	325	415	335	358.33	73.69	80.04	80.14	77.96	77.8
2	8	132.4	27.4	15.6306	417.1	502.3	444	454.47	411.2	505.9	475.1	464.07	325.25	259.25	229.5	271.33	225.1	197.6	192.85	205.18	155	161.75	163	159.92	156.75	159.75	156.75	157.75	710	860	800	790	670	850	760	760	1020	635	705	786.67	725	400	445	523.33	123.94	109.13	106.99	113.35	125.49
2	8				258.9	210.1	228.5	232.5	230.9	212.8	228	223.9	218.65	197.3	171.85	195.93	250.6	204.1	200.85	218.52	128.75	112.25	135.75	125.58	105	122	120.5	115.83	740	640	640	673.33	710	620	650	660	475	665	560	566.67	690	600	475	588.33	93.36	98.36	92.03	94.58	100.7
2	12	148.2	43	19.5782	308.6	305.6	305.3	306.5	299.3	290.2	296.6	295.37	154.2	123.1	127.15	134.82	133.9	168.9	137.35	146.72	152	161	164.75	159.25	152.5	136	152.25	146.92	660	650	620	643.33	650	650	630	643.33	355	295	365	338.33	325	490	420	411.67	102.02	94.23	103.29	99.85	97.28
2	8	126	24.7	15.5581	167.7	166.8	164.3	166.27	161.3	170.1	137.6	156.33	91.3	108.75	109.1	103.05	112	134.35	109.5	118.62	112.25	120.5	117.75	116.83	117	112	99	109.33	670	660	660	663.33	660	680	540	626.67	540	265	300	368.33	705	665	310	560	89.14	78.11	75	80.75	91.14
2	14	181.7	62.1	18.8097	168.3	179.9	174.1	174.1	167.7	170.3	163.1	167.03	124.45	134.5	117.55	125.5	143.2	144.55	138.5	142.08	115.5	105.25	111.25	110.67	111.5	105.75	106.25	107.83	510	550	530	530	570	580	540	563.33	560	790	530	626.67	440	465	470	458.33	93.55	108.37	95.97	99.3	86.75
2	11	151	49.4	21.6657	189.4	177	157.6	174.67	190.2	206.9	184.1	193.73	132.35	134	126.3	130.88	187.85	143.45	136.85	156.05	95.5	99.5	95.75	96.92	95.75	107	99.25	100.67	710	700	620	676.67	770	810	700	760	325	350	435	370	395	280	370	348.33	80	80.52	93.19	84.57	72.27
2	8				155.2	136.4	129	140.2	148.7	143.7	145.9	146.1	107.3	83.1	73.05	87.82	93.35	95.45	83.3	90.7	103.5	106.5	104.5	104.83	108.25	110.5	106.25	108.33	570	520	530	540	580	520	530	543.33	345	285	255	295	310	360	285	318.33	88.49	81.83	74.15	81.49	76.87
2	11	148.2	41.9	19.0773	324.7	342.3	319.9	328.97	357.3	331.4	326.6	338.43	169.5	240.55	152.2	187.42	167.85	153.85	177.8	166.5	130.25	136.5	135.75	134.17	138.5	139.25	141	139.58	650	680	630	653.33	680	650	650	660	595	720	590	635	540	435	655	543.33	113	107.85	103.53	108.13	111.06
2	9				119.8	107.8	92.4	106.67	96.8	100.3	98.2	98.43	117.45	104.65	93.2	105.1	75.5	94.2	117.45	95.72	76.75	76.5	74.25	75.83	80.25	82.25	76.5	79.67	730	600	560	630	580	600	570	583.33	320	505	365	396.67	205	395	340	313.33	67.9	71.54	70.51	69.98	51.64
2	11	150.7	47.8	21.0475	81.1	87.6	78.8	82.5	82.9	90.5	84.1	85.83	90.2	85.75	73.2	83.05	82.35	80.35	76.9	79.87	78	72.5	76.25	75.58	85.5	86.75	82.25	84.83	540	560	520	540	500	580	530	536.67	275	335	235	281.67	255	320	240	271.67	66.44	72.52	63.72	67.56	65.53
2	8				135.6	136.1	167.8	146.5	137	130.2	164.9	144.03	104.85	91.55	116.6	104.33	95.9	94.6	125.8	105.43	91.5	87.25	91	89.92	102.5	95.75	103	100.42	470	560	600	543.33	490	460	570	506.67	385	285	280	316.67	325	370	360	351.67	87.84	73.8	77.6	79.75	82.73
2	7	118.2	19.9	14.2435	223.5	218.2	210.1	217.27	216.8	203	209.6	209.8	136.5	129.85	126.4	130.92	151.05	153.75	116.1	140.3	105	109.75	104.5	106.42	102	108.25	107.75	106	710	680	670	686.67	700	660	680	680	330	315	315	320	415	445	300	386.67	92.02	87.94	89.67	89.88	88.2
2	8	140	48.7	24.8469	132.7	151.4	156.9	147	243.6	163		203.3	168	124	135.45	142.48	183.4	113.35		148.38	94.5	97	93.5	95	105.25	105		105.13	820	540	570	643.33	830	590		710	435	525	620	526.67	410	375		392.5	86.8	96.62	98.18	93.87	88.25
2	9	139.3	40.2	20.7169	71.8	73.9	79.9	75.2	71.7	68.9	68.2	69.6	69.65	65.4	66	67.02	77.8	64.85	60.2	67.62	87.25	86.25	91.75	88.42	88.25	88.5	88	88.25	490	500	540	510	510	500	480	496.67	520	310	360	396.67	485	365	255	368.33	68.08	61.59	60.91	63.53	64.07
2	9	124.6	24.3	15.652	236.3	208.2	211.4	218.63	206.1	204	215	208.37	149.4	166.3	141.8	152.5	152.95	162.25	135.1	150.1	108	110	112.5	110.17	111.75	114.75	114	113.5	830	730	730	763.33	780	720	720	740	315	405	320	346.67	280	350	430	353.33	79.05	81.8	77.27	79.37	69.74
2	11				133.3	131.8	127.4	130.83	129.3	131.6	131.7	130.87	120.65	133.75	112.2	122.2	129.95	123.7	123.55	125.73	91.75	91.5	98.5	93.92	96.25	96	98.25	96.83	540	540	490	523.33	520	510	510	513.33	455	470	455	460	525	525	535	528.33	78.86	80.78	85.89	81.84	88.94
2	9	139.6	45.3	23.2449	142.5	131.3	134.1	135.97	136.9	123.8	132.4	131.03	129.5	112.05	122.5	121.35	129.1	103.8	124.6	119.17	98.25	97.5	107.25	101	102.5	102	106	103.5	590	580	550	573.33	590	530	550	556.67	430	410	340	393.33	470	320	605	465	84.86	82.65	70.9	79.47	84.32
2	12	144.3	32.2	15.464	108.7	109.3	113.7	110.57	108.9	113.8	115.2	112.63	120.25	96.25	94.25	103.58	87.15	103.1	121	103.75	87.75	96.5	95.25	93.17	89.25	91.75	89.75	90.25	520	500	510	510	510	510	510	510	580	410	435	475	325	450	560	445	81.6	73.65	82.52	79.26	73.33
2	8	124.9	24	15.3846	162.6	149.9	174.7	162.4	155.7	162.3	154	157.33	127.15	120.8	125.2	124.38	112.65	122.1	118.5	117.75	105.25	101	108.25	104.83	93	84.75	92	89.92	580	530	590	566.67	560	600	560	573.33	460	420	395	425	330	315	390	345	92.79	93.35	89.54	91.89	86.49
2	10	137.1	30.1	16.0137	203.6	203.2	210.7	205.83	214.6	208.8	217.7	213.7	131.95	170.3	140.95	147.73	138.75	150.65	162.7	150.7	116.75	111	107.75	111.83	115.75	111.5	113.25	113.5	620	630	670	640	630	630	660	640	360	495	320	391.67	290	365	455	370	89.34	86.53	85.45	87.11	74.87
2	6	121.4	24.7	16.7594	301.8	273.6	268.4	281.27	291.9	294.4	292.2	292.83	138.75	135.7	116.1	130.18	124.95	133.15	125.85	127.98	152.5	148.75	143	148.08	138.75	154.25	150	147.67	630	610	590	610	640	600	580	606.67	375	430	350	385	345	675	375	465	108.19	102.9	99.26	103.45	103.21
2	9	129.6	25.2	15.0034	369.4	350	370.1	363.17	343.7	346.1	332	340.6	160.2	204.95	176.4	180.52	226.7	240.15	337.6	268.15	168.75	173.5	166.75	169.67	176.75	173.75	180.25	176.92	810	780	890	826.67	800	750	760	770	375	395	310	360	585	805	775	721.67	93.13	84.24	95.14	90.84	82.57
2	7	126.4	29	18.1511	161.1	150.8	165.1	159	155.2	153.8	145.5	151.5	114.45	97.55	96.4	102.8	108.6	109.55	101.2	106.45	115.5	116.25	122	117.92	109.5	111	117.5	112.67	590	560	560	570	570	560	540	556.67	470	365	450	428.33	370	495	350	405	81.55	75.15	84.31	80.34	86.72
2	11	147.3	36.5	16.8224	133.3	148.2	129.8	137.1	135.2	123	137.8	132	104.15	105.2	83.75	97.7	103.4	97.6	119.75	106.92	107.75	110.75	105.25	107.92	106.5	106.5	106.25	106.42	650	700	650	666.67	670	590	690	650	445	320	245	336.67	355	425	355	378.33	73.54	67.21	62.67	67.81	67
2	8				186.4	173.1	185.9	181.8	184.1	179.4	195.9	186.47	124	122.35	116.9	121.08	118.35	120.9	115.25	118.17	116	119.75	128.5	121.42	126.75	122	124	124.25	600	580	640	606.67	570	570	590	576.67	375	385	365	375	455	385	480	440	84.73	76.33	70.85	77.3	81.81
2	13	181.3	64.6	19.6534	155.7	136.8	136.3	142.93	138	133.5	128.5	133.33	115.8	101.35	109.5	108.88	104.2	110.65	122.25	112.37	115.25	113	115.75	114.67	108	109	109.25	108.75	640	560	570	590	600	550	530	560	345	360	520	408.33	450	625	690	588.33	73.26	73.55	79.61	75.47	75.8
2	9	146.4	39.9	18.6162	204.4	136.6	144.7	161.9	195.3	139.9	150	161.73	160.15	118.65	134.45	137.75	169.2	112.7	107.4	129.77	108.5	108.25	117.25	111.33	116.5	106.5	113	112	880	530	590	666.67	770	550	570	630	330	840	760	643.33	475	635	465	525	69.47	90	88.66	82.71	74.56
2	8	138.5	29	15.1181	188.2	210.1	193	197.1	189.6	208.2	223.9	207.23	106.75	127.65	115	116.47	112.5	124.75	138.3	125.18	117.75	131	121.75	123.5	133.25	127	138	132.75	560	590	580	576.67	560	590	620	590	300	530	465	431.67	350	465	430	415	87.52	94.13	89.46	90.37	84.62
2	12	163.3	56.6	21.2248	169	198.9	158.2	175.37	161.8	199.9	159.1	173.6	125.35	178.05	116.85	140.08	145.4	177.2	116.65	146.42	99.25	104.25	114	105.83	104	110.5	109	107.83	670	720	600	663.33	640	750	610	666.67	350	665	345	453.33	505	460	340	435	82.44	103.71	73.3	86.48	88.13
2	8	128	25.3	15.4419	145.6	136.2	128.1	136.63	151	150.1	136.2	145.77	97.3	99.75	78.4	91.82	98.55	106.75	80.2	95.17	111.25	113	106.75	110.33	113.25	106	115.25	111.5	710	620	570	633.33	700	700	620	673.33	250	370	265	295	235	285	265	261.67	58.02	64.71	63.33	62.02	62.44
2	11	147.9	37.6	17.189	193.4	197.3	172.4	187.7	201.2	198.1	181.4	193.57	91.75	93.05	83.9	89.57	131.7	103.55	99.45	111.57	164.75	159	155.75	159.83	166.25	145.5	139	150.25	510	520	450	493.33	530	510	440	493.33	290	330	365	328.33	420	445	475	446.67	88.66	87.7	92.52	89.63	91.8
2	14	188.9	86.8	24.3252	166.6	182.1	184.6	177.77	193.6	167.9	194.4	185.3	103.9	117.1	204.15	141.72	153.2	112.6	150.6	138.8	131.75	133.25	132	132.33	133.25	130.25	143.5	135.67	480	520	560	520	550	500	560	536.67	585	455	585	541.67	605	375	525	501.67	89.95	89.41	88.4	89.25	97.37
2	11	162	62.8	23.9293	152.3	166.6	143.8	154.23	148	155.7	150.3	151.33	113.4	122.05	120.25	118.57	137.6	123.8	142.35	134.58	98	102	94.25	98.08	101.25	98.75	88.25	96.08	760	830	760	783.33	760	780	760	766.67	390	380	445	405	355	465	340	386.67	75.6	84.01	76.45	78.69	75.33
2	11	142.7	27.6	13.5538	113.9	102.3	114	110.07	102.4	107.3	106.7	105.47	143.8	125.6	125	131.47	97.85	102.2	94.85	98.3	92.25	87.5	93	90.92	88.5	88.25	94.25	90.33	560	510	550	540	540	520	530	530	625	600	715	646.67	355	465	470	430	87.1	83.54	91.6	87.41	69.38
2	7	125.7	25	15.8223	326.5	373.8	343.9	348.07	338.6	343.9	356.7	346.4	188.45	208.6	170.4	189.15	205.45	177.35	199.5	194.1	140.5	149.25	149.75	146.5	151.75	146.75	148.5	149	750	780	720	750	710	680	750	713.33	535	500	375	470	515	420	475	470	88.1	96.9	93.28	92.76	95.26
2	9	135.7	28.6	15.5312	281.4	278.8	270.4	276.87	267.2	291.2	268.7	275.7	159.95	120.85	111.5	130.77	125.8	132.7	116.7	125.07	136.5	135.75	137.25	136.5	127.75	138.5	130	132.08	750	750	750	750	760	780	740	760	480	255	315	350	260	290	285	278.33	83.82	89.01	78.11	83.65	86.39
2	12	172	58.8	19.8756	161.8	163.3	139.6	154.9	154.9	149.7	146.9	150.5	116.3	111.3	131.5	119.7	109.55	101.6	125.85	112.33	87.25	88	80.25	85.17	91.25	88	89.5	89.58	690	690	610	663.33	670	680	640	663.33	320	315	375	336.67	290	265	320	291.67	78.44	76.01	85.16	79.87	75.67
2	8				191.8	195.2	187.5	191.5	198.5	209.1	207.3	204.97	175.7	133.5	155.9	155.03	144.5	144.65	130.35	139.83	104.25	114.5	108.25	109	109.25	108.75	115	111	650	660	640	650	660	670	650	660	510	380	485	458.33	360	360	330	350	88.39	74.14	78.49	80.34	85.46
2	13	152.1	47.6	20.5754	160.5	157	142.4	153.3	159.1	154.9	158	157.33	129.85	108.55	107	115.13	113.15	126.15	120.9	120.07	90.5	96.75	93	93.42	99	95.5	103.5	99.33	760	740	660	720	720	700	690	703.33	265	265	270	266.67	270	395	330	331.67	69.1	68.35	71.42	69.62	64.05
2	9	142.6	33.1	16.2775	200	213.4	207	206.8	217.8	217.7	208.6	214.7	171.8	226.5	156.35	184.88	197	179.25	187.6	187.95	110.5	100.75	111.25	107.5	112	108.5	113.5	111.33	620	650	620	630	650	650	620	640	515	760	540	605	680	510	630	606.67	107.73	102.22	106.37	105.44	112.24
2	7	129.7	24	14.267	131.2	142.8	157.3	143.77	154	135.4	140.4	143.27	112.95	105.85	104.4	107.73	90.7	82.15	85.45	86.1	120.25	122.5	122.5	121.75	131.75	123.5	122.5	125.92	520	520	550	530	560	490	530	526.67	495	435	440	456.67	410	390	335	378.33	78.9	76.66	82.34	79.3	72.62
2	13				253.7	219	220.4	231.03	231.2	241.1	255.1	242.47	195.6	166.8	195.3	185.9	167.8	298.55	182.9	216.42	115.75	115.5	115.75	115.67	111	117.5	126	118.17	680	620	610	636.67	600	640	630	623.33	465	560	495	506.67	510	925	490	641.67	96.75	95	99.32	97.02	107.83
2	11	138	37.5	19.6912	171.1	167.6	179.9	172.87	158.5	175.9	162.8	165.73	137.55	147.9	144.3	143.25	118.9	119.8	108.4	115.7	94.5	92.5	97.25	94.75	82.75	89.5	92.25	88.17	660	660	670	663.33	620	640	630	630	500	505	400	468.33	360	355	300	338.33	83.1	80.01	75.48	79.53	86.22
2	8	150	40.8	18.1333	133.6	137.1	121.8	130.83	160.7	149.3	158.5	156.17	86.9	90	74.6	83.83	104.85	87.65	86.45	92.98	113.25	121.5	116	116.92	110.5	111.5	105	109	560	550	550	553.33	620	570	630	606.67	250	410	220	293.33	535	390	320	415	71.32	87.59	69.77	76.23	98.3
2	11	152.5	51.4	22.1016	140.5	126.8	123.8	130.37	149.9	136.9	125.2	137.33	114.35	95.25	99.65	103.08	128.65	124.65	84.7	112.67	96.25	100.25	100.25	98.92	97.75	108.5	104.25	103.5	660	600	560	606.67	720	610	570	633.33	385	390	445	406.67	425	540	265	410	73.56	71.06	76.02	73.55	79.64
2	10	155.3	42.4	17.5802	94.5	94.9	92.6	94	92.9	96.9	97.8	95.87	110.8	95.4	82.35	96.18	146.45	120.8	114.45	127.23	67	72.75	72.25	70.67	60.25	72.75	73	68.67	630	640	600	623.33	620	640	630	630	495	270	230	331.67	330	450	330	370	75.24	62.22	59.86	65.77	71.49
2	14	168.8	56.3	19.7589	100.9	86.4	96.6	94.63	89.1	96.2	101.2	95.5	95.85	86.1	113.45	98.47	95.65	118.8	109	107.82	65	67.25	72.5	68.25	68.25	70.75	71.75	70.25	610	530	560	566.67	550	580	570	566.67	275	320	540	378.33	310	465	365	380	73.87	71.93	77.47	74.42	71.21
2	11	151.7	42.8	18.5983	256.2	241.1	231.3	242.87	262.9	254.5	222.2	246.53	132.2	277.55	139.45	183.07	128.65	126.85	193.8	149.77	123	147	132.75	134.25	126.25	123.25	147.25	132.25	710	640	650	666.67	720	680	610	670	295	970	385	550	305	325	545	391.67	82.69	105.71	89.12	92.51	81.65
2	8	139.4	45	23.1572	187	203.3	202.6	197.63	202.3	207.8	208.3	206.13	127.35	142.7	140.25	136.77	134.55	137.25	139.7	137.17	112.75	121.25	123.25	119.08	113.75	121	112.5	115.75	600	650	660	636.67	660	670	660	663.33	375	500	370	415	340	400	410	383.33	87.08	90.1	84.57	87.25	91.67
2	9	133.7	40.1	22.4327	94.7	103.7	104.3	100.9	105.3	103.7	104.2	104.4	75	125.4	85.25	95.22	84.35	79.6	70.95	78.3	83.75	82.5	86.75	84.33	86	84.75	83.25	84.67	520	550	560	543.33	550	540	560	550	265	545	305	371.67	295	250	280	275	60.37	74.58	64.25	66.4	62.24
2	12	156.7	41.4	16.8602	153.3	137.5	121.7	137.5	121.7	128.7	138.1	129.5	89.5	84.6	101.35	91.82	86.5	86.7	92.75	88.65	121.25	110.75	105.75	112.58	114.25	111.25	107.5	111	560	540	510	536.67	530	510	560	533.33	385	345	355	361.67	295	290	370	318.33	82	76.35	75.01	77.79	72.7
2	9	139	31	16.0447	207.6	213.2	191.7	204.17	204.8	205.3	216.6	208.9	115.15	127.55	124.75	122.48	109.5	106.15	105.5	107.05	115	116	126	119	122	127	126	125	670	700	630	666.67	660	650	670	660	280	295	340	305	340	300	295	311.67	78.73	79.77	79.18	79.23	77.32
2	14	165	47.7	17.5207	125.4	129.8	152.3	135.83	128.9	138.4	132	133.1	129.8	124.5	177.2	143.83	157.55	188.75	250.45	198.92	89.25	92	93	91.42	81.25	72	72.75	75.33	570	570	680	606.67	540	660	630	610	580	490	440	503.33	970	465	645	693.33	80.64	82.13	79.17	80.65	108.02
2	9	146.7	34.2	15.8915	245.6	229.3	220.2	231.7	191.3	145.9	211.8	183	107.75	162.2	131.55	133.83	129.8	99.35	127	118.72	132.25	119.75	119	123.67	115.5	123	115.75	118.08	410	650	640	566.67	560	390	660	536.67	760	465	375	533.33	420	605	310	445	108.58	102.35	89.67	100.2	101.21
2	7	132	24.5	14.0611	233.5	238.9	229.9	234.1	212.4	224.9	221.5	219.6	158.8	173.35	176.85	169.67	145.1	212.4	141.7	166.4	130.25	134.75	144.5	136.5	132	137.25	130	133.08	660	650	620	643.33	620	680	720	673.33	555	610	535	566.67	415	575	380	456.67	94.35	96.52	84.06	91.64	79.87
2	10	151.6	36.4	15.8381	165.3	149.3	147.7	154.1	162.9	162.6	177.5	167.67	98.85	95.8	94.2	96.28	111.15	103.2	131.75	115.37	115	114.25	118.75	116	110.25	116.75	120	115.67	620	580	590	596.67	590	610	600	600	280	275	320	291.67	385	375	390	383.33	75.48	72.24	64.78	70.83	87.96
2	8	135.5	26.8	14.5968	115.3	115	128.5	119.6	123.8	121.8	125	123.53	70.65	64.75	69.05	68.15	73.8	74.55	89.4	79.25	105.5	104.75	107.5	105.92	101	104.75	100.5	102.08	510	500	550	520	550	530	550	543.33	220	280	290	263.33	225	340	305	290	69.02	75.5	77.9	74.14	76.24
2	8	131.5	27.3	15.7874	317	329.1	317.5	321.2	319	318.3	318.9	318.73	180.25	190	131.1	167.12	162.25	148.7	152.95	154.63	139.5	140.75	152.75	144.33	144	146.5	148.5	146.33	610	620	620	616.67	620	600	580	600	440	670	490	533.33	525	560	600	561.67	126.37	138.21	117.27	127.283	121.79
2	6	122.5	22.1	14.7272	157.7	156.3	168	160.67	157.9	158.9	157.4	158.07	90.9	93.5	97.5	93.97	86.6	85.65	80.65	84.3	117.5	117.25	117	117.25	113.75	115.75	119	116.17	630	630	670	643.33	610	600	610	606.67	245	255	215	238.33	295	270	240	268.33	70.32	72.69	70.59	71.2	75.18
2	10	141.6	31.6	15.7602	188.1	177.2	181.9	182.4	185.5	194.3	185.8	188.53	161.1	151.1	167.05	159.75	191.75	197.65	184.95	191.45	90.5	88.5	94.25	91.08	92	104.75	100.5	99.08	650	610	610	623.33	630	660	630	640	385	435	520	446.67	630	420	615	555	97.15	101	101.59	99.91	107.69
2	7	128	24.1	14.7095	430.8	429.7	406.6	422.37	426.2	427.1	389.2	414.17	237.25	206.3	211.1	218.22	295.05	235.4	250.65	260.37	134.25	139.25	138.75	137.42	135	135.75	140.5	137.08	800		750	775	810	800	740	783.33	625	400	475	500	800	615	700	705	110.53	107.62	114.32	110.82	108.39
2	8				109.7	116.8	104.3	110.27	98.6	104.1	107.8	103.5	77.85	91.6	75.5	81.65	63.4	67.6	69.7	66.9	91	79.5	89.5	86.67	87.75	76.25	95	86.33	620	640	600	620	560	590	600	583.33	190	275	210	225	170	170	160	166.67	58.85	72.04	59.99	63.63	58.18
2	8	139.6	30.9	15.8558	117.4	118.3	122.2	119.3	126.4	116.6	121.2	121.4	137.75	114.85	112	121.53	148.25	92.4	102.75	114.47	101	105.75	103.5	103.42	92.75	102.5	105	100.08	510	510	500	506.67	520	500	490	503.33	500	480	570	516.67	490	505	455	483.33	85.28	84.29	86.76	85.44	93.56
2	7	122.3	24	16.0457	198.1	221.8	211	210.3	224.5	192.6	211.1	209.4	248.25	166.7	148.75	187.9	219.1	151.3	166.15	178.85	99.75	106.5	105.75	104	102.75	97.75	103.75	101.42	720	740	760	740	760	710	750	740	1085	365	380	610	680	355	380	471.67	90.94	88.02	83.13	87.36	92.15
2	8				128.2	115.2	115.4	119.6	115.7	119.4	123.4	119.5	98.1	95.9	92.05	95.35	93.45	115.45	107.65	105.52	99.5	90	91	93.5	99	101	95.5	98.5	530	470	470	490	480	460	480	473.33	305	475	405	395	435	730	415	526.67	85.39	99.44	92.17	92.33	89.24
2	6	121	20.5	14.0018	103.8	105.1	106	104.97	103.1	107.5	127.5	112.7	84.95	68.85	75.3	76.37	70.7	76.5	89.1	78.77	89.25	88	93.75	90.33	92.75	94.5	94	93.75	550	550	540	546.67	530	570	630	576.67	285	185	255	241.67	195	195	205	198.33	68.56	62.5	67.37	66.14	68.14
2	9	137.6	43.8	23.1333	169.6	161.8	184.3	171.9	178.6	169	165.4	171	135.3	190.85	239.4	188.52	142	158.95	165.3	155.42	100.75	103.25	92	98.67	108	102	101.5	103.83	580	580	620	593.33	620	580	620	606.67	445	850	880	725	405	585	650	546.67	89.34	86.84	96.47	90.88	84.04
2	6	127.3	25.5	15.7356	126.3	121	110.7	119.33	127.2	129.4	132.1	129.57	106.6	126.8	101.3	111.57	136.2	124.25	169.05	143.17	81.75	77.5	84.75	81.33	76.75	79	78.5	78.08	630	620	550	600	640	640	680	653.33	415	375	495	428.33	510	560	735	601.67	76.51	78.87	87.6	80.99	85.9
2	8	145.6	41.2	19.4345	161.4	178.5	190.5	176.8	129.8	147.2	155.2	144.07	92.5	97.3	152.65	114.15	89	82.65	94.85	88.83	98.75	99.75	107.5	102	101.75	89.25	94.5	95.17	820	880	960	886.67	690	820	850	786.67	185	220	230	211.67	220	160	210	196.67	53.78	62.12	58.37	58.09	58.46
2	14	178	66.2	20.8938	165.4	186.6	172	174.67	177.7	159.8	168.8	168.77	137.05	141.05	134.55	137.55	158.95	140	155.25	151.4	103.5	115.25	111.25	110	109.5	104	113.5	109	610	620	590	606.67	630	580	610	606.67	550	635	610	598.33	510	575	495	526.67	87.4	86.8	85.21	86.47	90.55
2	13	167.1	46.2	16.5458	101.2	117.5	108.5	109.07	110.8	109	102.3	107.37	81.6	98.1	89.75	89.82	104.3	75.8	93.35	91.15	90.25	94.5	92.5	92.42	93.5	92	93.75	93.08	600	680	610	630	640	630	610	626.67	250	260	265	258.33	295	245	255	265	67.51	62.06	66.07	65.21	68.03
2	8	130.2	23.2	13.6857	130	117.3	133.1	126.8	122.9	118.5	128.9	123.43	94	87.7	93.45	91.72	83.4	102.85	89	91.75	94	86.5	93.25	91.25	93.25	88.5	96	92.58	570	550	570	563.33	580	550	570	566.67	300	290	330	306.67	220	295	270	261.67	74.87	74.08	73.2	74.05	70.99
2	9	138	27.8	14.5978	227	231.8	236.5	231.77	215.6	221.5	224.2	220.43	158.95	139.7	175.05	157.9	135.65	189.1	208	177.58	97.25	101.25	101.5	100	115	112	104.25	110.42	730	750	720	733.33	690	700	750	713.33	330	270	355	318.33	295	530	445	423.33	91.02	88.99	105	95	85.45
2	7				117.2	98.4	107.8	107.8	90.1	84.8	110.4	95.1	98.75	80.4	85.15	88.1	93.85	79.55	90.25	87.88	80.25	83.75	81.5	81.83	88	81	79.75	82.92	690	580	650	640	550	520	660	576.67	250	310	245	268.33	330	280	275	295	61.36	61.09	59.85	60.77	59.62
2	12	162.3	38.9	14.7677	122.6	125.6	125.1	124.43	131.6	116.2	132.1	126.63	100.35	95.55	103.4	99.77	111.15	96.35	116.35	107.95	93	92.25	95	93.42	87.25	92.75	86.5	88.83	640	630	640	636.67	720	620	710	683.33	225	315	240	260	310	280	250	280	63.31	75.69	67.08	68.69	73.08
2	12	161.4	42	16.1229	373	381.5	352.8	369.1	386.2	346.9	352.7	361.93	329.05	223.4	173.75	242.07	175.9	277.1	163.4	205.47	140	145.75	146	143.92	151.75	144	148.75	148.17	820	800	750	790	780	730	710	740	915	440	345	566.67	460	635	435	510	102.33	102.9	95.64	100.29	94.33
2	13	162.8	45.9	17.3182	173.4	170.4	141.3	161.7	156	169.9		162.95	122.6	125.9	119.95	122.82	202.05	125.35		163.7	116.25	115.75	117	116.33	101.5	120.75		111.13	630	620	500	583.33	560	590		575	530	455	640	541.67	760	715		737.5	89.61	88.56	101.7	93.29	110.89
2	14	179.7	54	16.7224	172	218.1	168.2	186.1	174.7	207	171.3	184.33	113.95	144.55	107.85	122.12	131.55	150.15	148.65	143.45	118.5	105.25	119.75	114.5	114.5	110.5	109.75	111.58	630	730	610	656.67	610	720	560	630	445	440	360	415	475	460	560	498.33	96.23	70.89	84.51	83.88	98.35
2	12	153.2	46.6	19.8549	191	184.7	175.9	183.87	189.2	182.4	176.6	182.73	136.1	129.25	117	127.45	127.2	116.55	145.55	129.77	139.25	137.5	130.75	135.83	135	140.75	128	134.58	600	580	570	583.33	600	570	580	583.33	525	590	465	526.67	440	435	540	471.67	95.23	95.13	88.47	92.94	89.24
2	13	166.4	78.7	28.4229	149.7	159	131.9	146.87	146.5	145.4	138.8	143.57	89.15	93.45	79.35	87.32	77.55	86.4	80.45	81.47	96.5	96.5	96.5	96.5	99	102.5	100.5	100.67	670	700	600	656.67	670	650	620	646.67	195	250	205	216.67	185	225	235	215	70.4	73.39	71.85	71.88	65.45
2	11	154.9	41	17.0876	351.4	326.2	332.8	336.8	363.7	337.7	351.7	351.03	150.1	153.75	153	152.28	151.95	131.55	144.55	142.68	155.5	168	167.5	163.67	169.25	167.25	169	168.5	840	720	730	763.33	810	750	780	780	320	355	370	348.33	280	295	260	278.33	78.33	80.09	79.64	79.35	86.52
2	8	141.2	36.1	18.1066	148.2	150.3	156.5	151.67	161.4	157.8	166	161.73	153.55	174.85	172.4	166.93	130.9	163.45	142.85	145.73	109.25	110.5	112.75	110.83	110.75	111	111.25	111	560	570	580	570	570	570	600	580	595	525	645	588.33	530	575	550	551.67	81.64	78.43	84.8	81.62	87.46
2	7	127.8	28.9	17.6944	97	104.2	98.1	99.77	105.5	102.9	109.9	106.1	76.8	73.45	80.1	76.78	83.6	72.8	77.4	77.93	95	92	82	89.67	94.5	89.75	88.75	91	480	510	530	506.67	520	540	560	540	290	275	295	286.67	360	295	345	333.33	70.16	63.91	72.45	68.84	75.44
2	11	154.8	44.5	18.5703	206.1	187.9	192.2	195.4	190.1	190.9	183.2	188.07	179.85	147.5	148.7	158.68	154.65	148	124.95	142.53	96.5	111.5	107.5	105.17	112	112	118.5	114.17	710	650	650	670	680	670	630	660	530	485	415	476.67	390	385	355	376.67	92.14	85.18	82.81	86.71	85.75
2	8	142	32	15.8699	487.3	467.7	497	484	512.1	461.9	486.4	486.8	178.3	152.1	184.05	171.48	185.2	187.55	210.25	194.33	176.75	175.5	180	177.42	169.75	165.5	167.75	167.67	770	710	740	740	770	690	750	736.67	360	350	510	406.67	355	430	640	475	109.95	111.45	121.43	114.28	110.75
2	13	150.1	36.6	16.245	304.2	353.1	320.3	325.87	348.7	347.1	330.8	342.2	123.4	139.8	153.1	138.77	145.9	203.15	155.65	168.23	139	143.5	141.75	141.42	148.25	154.25	149.5	150.67	640	730	720	696.67	730	770	700	733.33	325	385	475	395	340	450	325	371.67	95.6	89.12	86.31	90.34	96.07
2	7	132.5	21.9	12.4742	262.1	250.4	235.9	249.47	267.6	257	263.2	262.6	158.4	109.35	98.35	122.03	139.5	156.15	151.75	149.13	129.25	129.75	127	128.67	125.25	134	141.25	133.5	770	640	600	670	690	620	630	646.67	420	310	355	361.67	370	500	475	448.33	73.41	85.54	80.03	79.66	82.53
2	9	136	32.7	17.6795	144.8	146.8	134.6	142.07	152.9	143.7	135	143.87	117.2	131.7	120.85	123.25	127.9	108.95	129.95	122.27	80.25	82	83.25	81.83	83.75	81.5	81.5	82.25	650	630	610	630	740	680	610	676.67	295	410	375	360	345	285	395	341.67	79.91	89.45	85.21	84.86	78.42
2	11	148.2	42.7	19.4416	125.6	127.2	117.2	123.33	122	126.9	137.7	128.87	88.15	81.7	95.55	88.47	86.6	93.3	93.6	91.17	88.25	92.75	89.5	90.17	92	96.25	98	95.42	570	620	570	586.67	580	580	590	583.33	220	215	305	246.67	235	245	285	255	71.91	64.41	71.65	69.32	68.51
2	9	142.3	27.8	13.7289	135	136.8	143	138.27	138.8	158.6	142.4	146.6	136.35	142.65	313.4	197.47	106.45	112.45	107.3	108.73	97	102.5	97.25	98.92	102.75	110	103.5	105.42	570	570	610	583.33	580	610	570	586.67	365	390	360	371.67	395	370	310	358.33	88.41	85.4	78.93	84.25	89.38
2	8	136	27.7	14.9762	109	109.3	110.8	109.7	125.3	113.8	122.5	120.53	99.7	81.95	116.05	99.23	96.4	88.6	109.65	98.22	94	92.5	105.25	97.25	94	101.75	98.25	98	550	560	590	566.67	630	570	590	596.67	295	255	590	380	400	495	595	496.67	64.64	67.81	75.59	69.35	72.85
2	15	174.3	79.2	26.0694	123.9	122	119.9	121.93	121.3	124.5	113.3	119.7	87.35	85.7	89	87.35	99.2	95	81.6	91.93	109	102.5	105	105.5	85.5	108.75	99.5	97.92	490	480	470	480	500	490	450	480	460	395	445	433.33	410	360	360	376.67	96.51	94.06	99.77	96.78	108.87
2	14	164.3	46.8	17.3369	179.5	160.3	121.7	153.83	154.7	133.2	105.5	131.13	125.8	112.2	97.7	111.9	98.75	84	92.9	91.88	109.75	111.75	112.25	111.25	108.75	108.25	112.5	109.83	790	670	530	663.33	720	600	510	610	235	335	540	370	210	235	515	320	66.71	73.97	70.53	70.4	62.79
2	7	122.3	25	16.7143	311.3	336.5	348.5	332.1	336	351.4	344.7	344.03	172	174.55	175.15	173.9	157.1	193.7	159.85	170.22	132.25	128	127.25	129.17	148.5	125	143	138.83	690	750	790	743.33	710	750	770	743.33	510	485	380	458.33	560	400	315	425	112.6	113.13	106.26	110.66	103.45
2	7	128	28.3	17.2729	148.8	172.3	150.8	157.3	160.3	158.3	145	154.53	155.35	193.9	148.1	165.78	146.15	157.25	146.35	149.92	98.5	99	93.25	96.92	97	98.5	93	96.17	750	810	730	763.33	770	760	740	756.67	730	615	575	640	370	500	300	390	76.59	78.45	79.57	78.2	75.86
2	9	131.2	28	16.2664	121.2	127.2	127.7	125.37	122.4	129.2	129.7	127.1	150.8	138.45	131.05	140.1	137.85	168	119.9	141.92	68	78.5	77	74.5	71.5	66.75	79.5	72.58	720	770	760	750	730	750	740	740	380	310	300	330	400	490	295	395	72.67	65.18	63.75	67.2	66.8
2	12	144.7	42.9	20.489	313.2	333.2	309.2	318.53	368.3	308.9	326	334.4	159.15	154.6	153.3	155.68	196.5	137.8	150.5	161.6	136.5	134.75	144.25	138.5	147	138.75	147	144.25	880	910	840	876.67	980	860	860	900	265	270	295	276.67	325	240	285	283.33	79.18	78.07	77.84	78.36	75.41
2	6	127.5	24.7	15.1942	168.6	156.9	163.2	162.9	167	167.5	153.5	162.67	132.1	155.65	136.45	141.4	134.8	126.7	139.45	133.65	96.25	85.75	90.75	90.92	89.25	100	95.5	94.92	680	640	610	643.33	650	660	620	643.33	335	370	485	396.67	350	275	305	310	76.44	77.13	89.1	80.89	78.74
2	10	139.9	27.9	14.2551	121.3	126.8	125.7	124.6	115.9	117.2	122.5	118.53	98.85	130.4	98.35	109.2	88.65	95.85	103.3	95.93	91.75	89.5	91.25	90.83	90.5	94.5	92.75	92.58	680	730	710	706.67	660	650	680	663.33	265	305	240	270	220	265	235	240	60.56	63.18	58.85	60.86	62
2	13				101.7	109.8	115	108.83	104.4	118.5	109.7	110.87	88.35	103.5	100.65	97.5	91	99.25	89.05	93.1	73.75	73.25	81	76	78.5	78	80.25	78.92	580	600	590	590	570	630	610	603.33	260	345	355	320	245	290	295	276.67	74.71	81.23	76.62	77.52	71.48
2	14	165.4	63.4	23.1749	203.6	188	195.4	195.67	182.4	170.9	186.3	179.87	139.1	129.5	138.6	135.73	92.2	134.85	100	109.02	117	122.25	119	119.42	122.75	114.5	129.75	122.33	720	630	680	676.67	650	630	650	643.33	320	560	390	423.33	285	305	335	308.33	65.02	78.88	75.95	73.28	67.35
2	10	158.4	53.3	21.243	234.7	225.4	215.1	225.07	201.2	209.1	188.9	199.73	163.25	157	109.4	143.22	104.05	114.05	106.25	108.12	108.25	114.75	115	112.67	110.5	118.5	120	116.33	770	750	710	743.33	710	730	650	696.67	390	350	265	335	210	270	310	263.33	79.94	77.06	75.3	77.43	75.79
2	7	138.7	27.9	14.5028	178	176.9	185.3	180.07	163.8	169.3	177.3	170.13	127.1	134.2	120.2	127.17	128.8	133.6	122.2	128.2	96.75	98	103.5	99.42	94	95	101.25	96.75	610	610	620	613.33	560	600	620	593.33	475	460	330	421.67	615	515	465	531.67	98.01	93.33	82.69	91.34	98.44
2	11	153.2	47.8	20.3662	231.4	218.2	212.6	220.73	220.3	224.1	220.9	221.77	187.3	157.2	285.3	209.93	169.25	212.65	191	190.97	123.75	141.5	137.75	134.33	127.25	119	136.25	127.5	750	710	700	720	760	730	720	736.67	430	365	735	510	395	470	485	450	72.73	75.69	70.94	73.12	72.91
2	6	132.3	25.8	14.7401	187.9	177.8	126.6	164.1	174.6	156.7	159.4	163.57	209.2	158.65	140.3	169.38	136.9	147.25	131.75	138.63	80.25	92	98.75	90.33	100.75	109.75	113.5	108	650	660	450	586.67	630	500	500	543.33	540	460	825	608.33	305	670	630	535	104.64	87.46	102.75	98.28	77.07
2	13	161.6	51.9	19.874	299.5	257.4	249.7	268.87	251.3	235	256.6	247.63	189	184.8	149.6	174.47	164	151	177.8	164.27	116.75	114.75	114.25	115.25	111.25	108.5	108.5	109.42	700	650	640	663.33	670	610	660	646.67	570	480	400	483.33	490	420	490	466.67	97.1	100.9	100.94	99.65	86.85
2	8	134.8	28.1	15.4642	102	118.9	108.8	109.9	101.9	123.5	123.9	116.43	76.45	102.65	79.9	86.33	149.15	98.7	98	115.28	94.5	95.5	99.25	96.42	98	96.5	99	97.83	630	700	660	663.33	610	710	690	670	175	275	230	226.67	450	390	345	395	50.78	61.3	54.09	55.39	59.25
2	14	167.1	63.6	22.7774	181.2	190.7	183.7	185.2	185.3	196.5	181.5	187.77	174.85	220.7	231.2	208.92	244.2	207.5	207.05	219.58	108.5	107.5	108	108	116	115.25	116.75	116	550	580	560	563.33	560	580	580	573.33	855	680	630	721.67	885	660	530	691.67	112.64	101.86	101.12	105.21	109.36
2	8	139.2	33.1	17.0824	170.2	153.9	156.9	160.33	213.9	152.3	149.1	171.77	136.4	117.75	120.35	124.83	160.15	124.65	117.35	134.05	95	96.25	93.25	94.83	84.5	79.75	90.75	85	920	750	790	820	1060	850	740	883.33	245	225	255	241.67	245	280	280	268.33	56.5	67.04	64.91	62.82	64.44
2	9	147	57.6	26.6556	274.3	283.3		278.8	282.5	298.4	295.5	292.13	266.65	212.2		239.43	134.1	173.15	138	148.42	112.5	108.5		110.5	110.25	110.5	118.5	113.08	640	690		665	700	740	690	710	600	485		542.5	320	325	360	335	123.36	104.11		113.74	99.63
2	12	162.7	57.4	21.6839	206.3	203.9	200.5	203.57	223	200	202.6	208.53	173.8	157.2	150.5	160.5	176.2	162.45	158.15	165.6	122.25	122.75	119.75	121.58	130.5	130	133.25	131.25	660	640	620	640	690	630	650	656.67	470	505	615	530	485	545	435	488.33	79.59	87.06	95.75	87.47	80.43
2	8	129.7	28.8	17.1203	324.7	304	342.3	323.67	347.7	323.4	342.3	337.8	166.4	163.8	133.55	154.58	181.9	147.7	147.75	159.12	116.75	116.25	114.5	115.83	107	110.5	114.25	110.58	790	740	810	780	830	760	810	800	465	485	290	413.33	395	295	255	315	94.73	95.52	89.97	93.41	109.93
2	14	168.3	61.9	21.8536	323.9	309.3	342.7	325.3	312.9	294.6	333.7	313.73	146.55	144.65	166.3	152.5	148.55	207.95	184.3	180.27	151	154.25	157.5	154.25	151	141.5	153	148.5	610	550	610	590	580	560	610	583.33	475	480	600	518.33	445	855	680	660	116.7	111.27	128.37	118.78	118.02
2	10	138	27.6	14.4928	100.6	157.2	154.1	137.3	102.9	156	154.2	137.7	121.1	150.3	197.5	156.3	118.7	148.8	124.75	130.75	110.5	108.5	112.75	110.58	106	112.25	106.5	108.25	450	700	660	603.33	430	690	670	596.67	575	475	540	530	725	425	355	501.67	77.4	72.32	72.53	74.08	88.68
2	6	121.3	21.6	14.6802	208.3	212.5	222.8	214.53	205.3	209.4	213.2	209.3	116.4	124.45	109.7	116.85	131.4	114.45	123.85	123.23	117.75	125.5	113.5	118.92	120	114.75	121	118.58	580	610	600	596.67	590	590	630	603.33	320	340	440	366.67	305	255	335	298.33	86.03	89.18	95.57	90.26	91.52
2	10	147	32.1	14.8549	191.9	197.4	193.9	194.4	186.1	192.5	183.1	187.23	96.75	92.1	108.25	99.03	106.15	99.7	91.75	99.2	113.75	114.75	120.75	116.42	107.25	107.75	104.75	106.58	640	670	650	653.33	650	650	640	646.67	235	205	245	228.33	270	235	245	250	77.74	76.49	84.3	79.51	80.69
2	11				207.9	198.5	199.8	202.07	200.5	195.9	205.7	200.7	112	121.45	106.15	113.2	143.25	139.2	159.95	147.47	111.75	110.25	109.5	110.5	110	116.75	115.75	114.17	650	640	630	640	630	610	630	623.33	325	415	295	345	445	465	470	460	92.07	83.84	87.83	89.95	84.42
2	7	148	47.1	21.5029	191	209.8	217.5	206.1	180.9	211.1	202	198	120.65	123.9	122.35	122.3	144.9	150.4	124.65	139.98	131.25	125.5	128.25	128.33	120.5	115.5	113.25	116.42	540	620	610	590	540	630	600	590	745	455	445	548.33	660	465	540	555	108.44	92.55	99.4	100.13	104.61
2	9	135.9	29.5	15.9729	169.2	148.1	162.6	159.97	173.2	155.6	159.7	162.83	117.3	99.2	124.85	113.78	105.8	105.2	118.1	109.7	98.5	105.75	107.5	103.92	92.25	94.25	106.5	97.67	710	610	660	660	720	640	660	673.33	280	395	375	350	235	250	430	305	63.65	73.65	72.62	69.97	66.6
2	9	145.3	40.6	19.2307	251.1	233.6	287	257.23	243.8	246.4	270.9	253.7	139.15	133.8	143.7	138.88	132.55	136.45	136.25	135.08	123.75	120	121	121.58	109	117.5	123	116.5	680	630	770	693.33	670	640	750	686.67	310	355	290	318.33	360	345	295	333.33	89.32	95.45	90.53	91.77	93.93
2	7	132.5	26.4	15.0374	171.1	162.1	167.1	166.77	160.2	163.6	155.9	159.9	126.35	114	106.75	115.7	115.25	102.85	110.85	109.65	113.25	114.25	114.5	114	117	120.5	118.75	118.75	630	590	610	610	600	600	580	593.33	425	350	350	375	385	340	420	381.67	81.82	73.4	77.27	77.5	79.98
2	14	178.2	61.1	19.2409	110.2	105.5	110.1	108.6	104.5	112.8	112.8	110.03	245.45	157.85	226	209.77	205.9	174.3	125.55	168.58	76.25	81	74	77.08	79.75	81.75	78.25	79.92	620	600	570	596.67	580	620	600	600	965	885	1085	978.33	1240	660	880	926.67	89.48	86.63	113.7	96.6	111.55
2	12	165.3	48.3	17.6767	104.1	102.7	95	100.6	106	98.6	99.8	101.47	69.75	67.7	56.85	64.77	76.2	74	77.7	75.97	90.25	91.25	95	92.17	94.75	91	88	91.25	530	510	460	500	510	490	470	490	245	230	240	238.33	300	300	375	325	69.29	62.92	70.07	67.43	75.53
2	11	128.6	29.2	17.6563	261.3	238.1	206.6	235.33	304.3	236.6	207.4	249.43	209.6	163.55	151.75	174.97	185	175.3	181.5	180.6	104.25	120.75	122.25	115.75	118.75	116	118.75	117.83	940	840	700	826.67	1060	840	730	876.67	355	330	535	406.67	265	365	725	451.67	71.49	70.77	82.53	74.93	65.98
2	12	165.9	51.2	18.6028	141.9	124.2	110.9	125.67	127.2	118.5	126.4	124.03	134.75	137.85	148.65	140.42	143.05	147.3	153.25	147.87	103.25	99.75	99.25	100.75	95.25	96.5	101.75	97.83	700	610	550	620	620	580	600	600	400	565	570	511.67	475	645	670	596.67	66.23	73.9	76.39	72.17	73.61
2	13	148.6	53.3	24.1374	109.4	111.9	102.8	108.03	110.7	107.8	106.3	108.27	108.9	92.8	84.95	95.55	74.3	80.8	68.45	74.52	99.75	108.75	109.75	106.08	103.75	108.25	106.75	106.25	530	530	490	516.67	520	490	480	496.67	515	480	415	470	380	355	340	358.33	76.85	66.3	65.56	69.57	72.23
2	7	126.2	28	17.5808	171	169.9	160.9	167.27	163.2	155.7	147.2	155.37	107.3	90.9	111.85	103.35	104.55	80	124.55	103.03	97.25	100	98	98.42	92.75	90.25	91.75	91.58	790	760	760	770	780	740	710	743.33	245	175	240	220	230	160	365	251.67	64.09	64.25	62.47	63.6	66.47
2	10	145.2	35	16.601	78.2	71.7	82.7	77.53	85.9	85.3		85.6	73.65	63	77.5	71.38	86.6	79.35		82.98	76.5	75	76	75.83	71.5	77.25		74.38	500	490	540	510	520	520		520	305	215	305	275	455	360		407.5	65.33	61.52	63.27	63.37	85.05
2	9	141	30.1	15.1401	105.3	101.8	109.6	105.57	97.8	110.4	110.9	106.37	88.9	84	88.75	87.22	88.3	86.45	92.2	88.98	84.75	82.75	84.75	84.08	84	95	84.75	87.92	640	640	710	663.33	610	650	690	650	245	230	205	226.67	220	225	215	220	60.35	61.39	57.26	59.67	61.1
2	7	124.5	23.7	15.2901	121.9	161	137	139.97	157.1	152	144.2	151.1	135.7	123.95	121.6	127.08	108	140.9	136.55	128.48	95.5	94	97.25	95.58	107.75	101.5	101.75	103.67	540	680	600	606.67	650	620	580	616.67	490	375	485	450	350	430	605	461.67	81.36	69.45	64.24	71.68	74.97
2	10	138	27.7	14.5453	114.5	112.3	94.6	107.13	111.7	122.4	121.7	118.6	90.75	95.7	109.65	98.7	92.05	93.35	89.35	91.58	87	94	88.5	89.83	89	93.25	96.5	92.92	620	590	550	586.67	600	650	610	620	400	480	470	450	355	385	455	398.33	69.51	74.49	66.67	70.22	64.28
2	8	133	29.4	16.6205	202.2	212.4	213.8	209.47	201.5	205.7	208.9	205.37	187.3	207.65	132.1	175.68	128	149.8	270.55	182.78	90.5	94.25	92.75	92.5	90.75	98.75	96.5	95.33	660	690	680	676.67	660	700	700	686.67	610	660	300	523.33	295	390	825	503.33	95.8	87.84	88.34	90.66	93.6
2	12	157	44.2	17.9318	108.1	102.8	114	108.3	109.6	118.2	111.9	113.23	100.55	96.95	88.85	95.45	95.4	101.4	98.2	98.33	90.5	90.25	102	94.25	91	91.25	96.75	93	540	490	550	526.67	550	520	550	540	335	360	280	325	400	395	375	390	78.3	73.34	63.65	71.76	81.91
2	10	138.9	31	16.0678	168.5	190.5	167.7	175.57	156.3	195.3	165.9	172.5	127.3	162.6	129.7	139.87	127.65	119.95	135.45	127.68	104.5	110.5	107.25	107.42	110	118.5	110.5	113	700	760	680	713.33	650	760	700	703.33	485	585	445	505	445	350	395	396.67	84.09	83.69	81	82.93	74.45
2	6	122	26	17.4684	183	182	210.6	191.87	209.2	172.9	225.8	202.63	117.2	117.4	112.6	115.73	164.55	158.65	138.25	153.82	125.75	105.75	107.75	113.08	124	119.75	130.5	124.75	670	660	760	696.67	760	600	760	706.67	320	235	210	255	430	440	325	398.33	68.96	67.74	55.41	64.04	66.68
2	14				124.3	124.2	118.7	122.4	123.3	133.3	121.7	126.1	145.6	223.45	108.7	159.25	128.8	119.4	112.7	120.3	79.5	86.25	94.75	86.83	81	84.5	90.5	85.33	570	580	550	566.67	540	600	540	560	415	675	335	475	470	435	475	460	85.91	84.19	75.47	81.86	102.65
2	13	162	50.9	19.3949	107.6	99.8	101.9	103.1	89.2	108.1	86.9	94.73	105.95	94.45	99.05	99.82	87.8	100.3	85.75	91.28	85.75	85.5	85	85.42	76	87.75	83.75	82.5	590	550	530	556.67	500	570	490	520	360	325	395	360	355	320	330	335	81.68	81.13	81.09	81.3	85.43
2	8	144.5	36.8	17.6243	134.4	160.4	115.8	136.87	148.3	142.2	121	137.17	150.8	120.35	172.05	147.73	153.6	131.25	183.5	156.12	73.5	86.75	86	82.08	83.75	83	80.75	82.5	720	830	590	713.33	750	730	600	693.33	410	235	640	428.33	350	410	720	493.33	71.29	62.93	82.69	72.3	68.79
2	11	161.7	47.1	18.0136	109.5	99.8	94.3	101.2	97.7	100.4	104.6	100.9	72.95	99.15	90.3	87.47	101.85	98.15	117.95	105.98	92.5	91.5	90.5	91.5	79.5	92.75	91.75	88	560	560	550	556.67	560	540	550	550	225	470	310	335	295	290	310	298.33	62.34	70.41	64.53	65.76	57.83
2	7	122	20.2	13.5716	84.3	77.3	78.6	80.07	78.4	91.8	79.5	83.23	87.9	71.2	69.1	76.07	88.15	100.85	68.2	85.73	88	87.5	85.75	87.08	97.5	93.75	92	94.42	520	520	490	510	500	560	490	516.67	410	300	340	350	380	420	295	365	70.68	65.59	66.87	67.71	67.01
2	10	149	33.8	15.2245	254.6	254.7	262.1	257.13	253	263.2	268.7	261.63	188.8	212.9	215.25	205.65	146.05	148.6	162.3	152.32	128.75	135	131.25	131.67	123.5	124.75	125.75	124.67	680	690	650	673.33	660	690	690	680	805	650	620	691.67	380	435	465	426.67	89.4	92.41	95.51	92.44	97.42
2	13				201.9	201.5	198.2	200.53	228.7	222.1	228.2	226.33	116.1	159.1	155.35	143.52	151.85	174.55	151.7	159.37	136.25	126	122.75	128.33	125.75	127	127.75	126.83	560	560	560	560	580	580	590	583.33	385	485	450	440	430	545	420	465	92.85	92.73	89.61	91.73	104.2
2	11	147	34.8	16.1044	168.1	173	177.4	172.83	178.8	178	161.3	172.7	113.1	109.9	129.85	117.62	129.95	145.1	128.5	134.52	107.75	119.25	109.5	112.17	114	112.75	111.5	112.75	610	620	620	616.67	660	650	600	636.67	330	275	350	318.33	380	445	445	423.33	72.77	71.75	75.08	73.2	75.25
2	13	168.5	62.1	21.8722	229.6	237.8	229	232.13	221.8	226.1	224.2	224.03	173.1	196.7	178.55	182.78	222.6	218.2	194.35	211.72	100.25	108.75	101	103.33	87.5	87.5	104.75	93.25	710	730	700	713.33	700	730	690	706.67	390	455	405	416.67	540	525	465	510	93.28	91.28	87.85	90.8	97.03
2	7	129.5	24.5	14.6092	232.4	249.1	229.7	237.07	212	226.1	230.5	222.87	126.85	147.3	118.75	130.97	113	116.8	135.4	121.73	102.5	109.25	109.25	107	99.25	100.25	103.75	101.08	740	750	680	723.33	680	680	710	690	260	295	270	275	265	270	290	275	85.07	88.87	85.43	86.46	81.79
2	9	140.7	28.3	14.2955	133	136.1	122.6	130.57	118.9	124.2	126.7	123.27	85.8	121.95	81.15	96.3	80.3	84.25	75.6	80.05	94.75	96	93.5	94.75	99.25	97.5	95.5	97.42	680	700	630	670	600	670	650	640	245	325	225	265	325	215	195	245	66.28	70.05	65.03	67.12	74.7
2	9	137.4	30.4	16.1028	198.7	186.8	177.6	187.7	187.5	174.7	171	177.73	182.75	201.95	161.35	182.02	162.55	131.1	200.2	164.62	111.75	114	105	110.25	108.5	108.5	112.5	109.83	620	590	550	586.67	590	540	530	553.33	575	830	805	736.67	620	575	900	698.33	100.5	119.78	127.08	115.79	110.26
2	7	122.6	27.7	18.4289	426.3	433.9	440.5	433.57	427.8	399.6	473.8	433.73	230.7	184.35	187.05	200.7	213.95	280.1	207	233.68	131.5	125.75	129	128.75	137	120.25	133	130.08	820	820	880	840	840	800	900	846.67	410	380	325	371.67	475	535	420	476.67	98.2	101.98	99.48	99.89	111.25
2	9	136	36.5	19.734	249.7	256.8	256.6	254.37	257.5	254.8	257	256.43	150.8	132.3	142.05	141.72	137	112.45	137.35	128.93	115	121.5	119	118.5	132.25	130.25	133.25	131.92	690	700	690	693.33	700	680	690	690	350	355	390	365	370	310	275	318.33	97.47	101.67	101.97	100.37	93.74
2	9	141.8	36.7	18.2521	102.7	100.6	98.4	100.57	103.2	107.4	89.8	100.13	87.7	94.1	94.65	92.15	128.6	108.75	94.45	110.6	85	77.75	79	80.58	72.75	77.25	75.25	75.08	610	560	560	576.67	590	620	560	590	305	320	300	308.33	425	335	335	365	73.18	76.9	76.34	75.47	86.13
2	6	127.2	25.8	15.9458	112.6	115.8	123.2	117.2	104.2	109	115.8	109.67	92.15	84.8	90.2	89.05	89.5	93.7	79.25	87.48	86.75	85.75	88	86.83	86.25	83.75	89	86.33	510	530	550	530	480	520	550	516.67	465	460	330	418.33	560	335	285	393.33	97.52	89.42	82.94	89.96	96.42
2	10	142.7	35.7	17.5315	107.9	124.1	116.7	116.23	104.1	116.1	115.9	112.03	75.1	77.5	68.3	73.63	93.2	80.75	75.1	83.02	102	104.5	102	102.83	102.5	105.5	102.5	103.5	480	550	530	520	480	520	550	516.67	505	340	285	376.67	710	520	430	553.33	83.14	69.29	71.24	74.56	90.12
2	8	130.5	30.3	17.7919	225.2	250.2	216.7	230.7	236.5	265.9	228.5	243.63	173.9	169.25	159.15	167.43	131.65	178.95	140.2	150.27	124.25	116.25	129.5	123.33	118.75	118.5	115.75	117.67	590	680	560	610	580	670	590	613.33	640	480	560	560	490	445	425	453.33	121.69	97.11	106.62	108.47	116.69
2	14	128.2	27.6	16.7932	125.3	122	131.3	126.2	111.6	124	134.5	123.37	105.45	108.45	113.9	109.27	85.9	90.2	81.45	85.85	108.5	112.5	104.5	108.5	105	109.5	109.75	108.08	590	560	620	590	530	580	610	573.33	420	465	285	390	270	315	180	255	70.32	70.83	62.6	67.92	61.67
2	7	177.5	92.5	29.3593	224.8	231.2	180.8	212.27	219.2	221.5	196.2	212.3	178.6	211.65	189.65	193.3	141.05	168.9	146.3	152.08	113.5	118.5	101.75	111.25	118.75	122	122	120.92	760	740	610	703.33	700	720	650	690	430	565	615	536.67	440	425	485	450	75.34	80.89	83.42	79.88	87.77
2	9	135.7	44.8	24.3287	228.8	223.3	248	233.37	245.5	233	236	238.17	221.1	182.1	238.15	213.78	216.65	223.9	248.3	229.62	109.75	117.75	102.75	110.08	116	126.5	118.25	120.25	720	670	760	716.67	720	700	720	713.33	555	495	550	533.33	710	745	650	701.67	84.32	83.14	85.89	84.45	80.65
2	13	167.1	55.8	19.9839	262.6	243.8	265.3	257.23	251.8	249.8	258.9	253.5	256.35	263.6	292.8	270.92	249.15	284.55	238.8	257.5	123	116.75	126.75	122.17	124	117.5	125.5	122.33	820	770	800	796.67	790	740	810	780	565	630	660	618.33	770	730	615	705	78.15	77.56	76.53	77.4133	73.24
2	7	125.8	23.9	15.1021	237.4	250.4	238.1	241.97	235.6	253.1	242.8	243.83	167.55	156.85	152.5	158.97	163.8	177.05	144.75	161.87	150.25	148.25	148.25	148.92	137.75	143.75	152.5	144.67	650	670	660	660	630	670	650	650	835	790	815	813.33	655	765	600	673.33	99.21	105.4	97.81	100.81	107.29
2	8	126.5	24.9	15.5603	290.9	282.9	273.6	282.47	305.9	294.5	281.9	294.1	236.35	223.95	231.15	230.48	240	194.15	183.8	205.98	121.25	123.25	116	120.17	126.75	134.5	130.75	130.67	710	710	680	700	710	710	670	696.67	575	565	565	568.33	660	500	530	563.33	104.24	100.14	106.96	103.78	111.52
2	12	155.5	53	21.9187	153.7	139.3	149.2	147.4	147.8	144.4	151	147.73	176.75	143.65	192.2	170.87	128.25	113.65	138	126.63	84	83.75	79.25	82.33	93.25	89.75	93.25	92.08	620	560	600	593.33	610	580	580	590	580	465	670	571.67	415	295	505	405	89.15	93.19	95.55	92.63	86.46
2	13	175.5	59.2	19.2206	138.5	122.7	113.9	125.03	121.5	128.4	131.1	127	104.85	93.45	80.75	93.02	100.85	97.4	97.35	98.53	89.25	89.75	94.25	91.08	93.5	94.5	92.5	93.5	600	540	490	543.33	540	560	550	550	305	300	325	310	420	315	330	355	80.9	82.44	83.17	82.17	86.95
2	7	137.5	31.3	16.5554	236.8	217.6	226.1	226.83	236.1	238.6	235.3	236.67	159.5	158.55	145.7	154.58	228.65	214.25	183.1	208.67	128.75	129.5	129	129.08	118	130.75	127.25	125.33	640	620	620	626.67	680	630	660	656.67	365	435	425	408.33	495	620	535	550	84.05	88.6	88.41	87.02	91.24
2	12	156.9	47	19.092	473.7	498	509.2	493.63	473.8	490.6	483.2	482.53	171.85	191	174.2	179.02	176.85	165.9	188.2	176.98	163.5	166.5	181.75	170.58	175.5	174.5	176.75	175.58	810	840	860	836.67	830	840	830	833.33	430	530	370	443.33	385	360	395	380	102.45	104.94	97.04	101.48	97.79
2	9	135	47.2	25.8985	308.4	271.6	254.2	278.07	264.8	270.7	300.9	278.8	191.95	129.3	129	150.08	127.2	130.85	169.7	142.58	142.5	139.75	142.25	141.5	136.25	133.5	133.75	134.5	760	690	670	706.67	700	700	760	720	390	290	295	325	315	295	565	391.67	87.95	85.37	83.3	85.54	86.96
2	11	160	46.3	18.0859	389	316.6	341.8	349.13	306	322.8	338.4	322.4	298.85	243.15	168.8	236.93	181	242.7	223.15	215.62	158	150	151.5	153.17	134	154.25	153	147.08	780	650	690	706.67	610	700	710	673.33	660	650	400	570	600	660	730	663.33	96.3	102.39	95.11	97.93	118.66
2	9	141.4	31.1	15.5547	344.3	351	332.7	342.67	316.6	326.5	334.7	325.93	240.85	297.15	196.35	244.78	210.6	213.1	261.1	228.27	118.25	124.25	128.5	123.67	134.25	130.5	121	128.58	780	750	740	756.67	730	750	740	740	475	795	445	571.67	550	440	580	523.33	108.55	118.99	98.03	108.52	88.25
2	9				223.7	216.6	240	226.77	242.3	231.1	236.9	236.77	172.35	146.9	143.95	154.4	194.6	197.65	212.7	201.65	122.25	133.5	132.75	129.5	138	129.75	130.5	132.75	690	680	720	696.67	740	680	720	713.33	500	430	275	401.67	435	470	585	496.67	74.57	72.21	70.81	72.53	76.75
2	7	132	25.5	14.635	166	156.5	168.2	163.57	188.9	153.1	161.2	167.73	121.2	129.4	132.25	127.62	142.9	124.1	137.8	134.93	99.25	106	109.25	104.83	107.25	103.5	111	107.25	720	620	670	670	760	620	660	680	300	480	450	410	520	510	375	468.33	73.09	78.63	82.91	78.21	86.18
2	12				335.5	317.4	321.5	324.8	334.3	318.7	331.3	328.1	338.05	250.05	245.35	277.82	288.8	383.1	380.6	350.83	117.5	118.5	119	118.33	112.5	100.75	105	106.08	810	790	800	800	850	790	800	813.33	720	610	590	640	575	825	775	725	104.32	98.96	103.83	102.37	107.48
2	12	151.1	47.4	20.7611	225.7	219.8	230.2	225.23	227.8	234.9	230.2	230.97	190.65	202	133.1	175.25	160.45	176.15	145.95	160.85	125.75	129.25	130.25	128.42	133.25	118.5	127	126.25	590	580	610	593.33	600	600	620	606.67	560	795	380	578.33	540	535	450	508.33	122.9	113.45	98.63	111.66	110.68
2	12	155.7	45.7	18.8512	181.6	166.7	169.4	172.57	164.2	171.9	175.1	170.4	140.1	122.45	134.65	132.4	83.65	95.85	101.35	93.62	107.25	104.75	93	101.67	115.75	113.5	110.25	113.17	670	590	610	623.33	630	630	610	623.33	460	300	325	361.67	200	245	270	238.33	85.1	80.42	87.86	84.46	72.12
2	9	145.5	44.2	20.8784	141.5	153.6	147.7	147.6	160.6	144.3	139.6	148.17	117	99.6	102.3	106.3	97.55	91.9	96.3	95.25	97	104.25	105.25	102.17	109.75	104.5	103.5	105.92	550	560	550	553.33	580	550	520	550	555	460	545	520	430	440	570	480	96.69	84.88	88.87	90.15	88.36
2	10	145.6	39.4	18.5855	117.2	116.7	117.1	117	128.9	125.5	125.2	126.53	70.6	78.15	71.35	73.37	75.25	71.25	67.05	71.18	97.75	99.5	103.5	100.25	99.25	102.25	101	100.83	560	560	590	570	620	540	560	573.33	195	225	185	201.67	205	200	190	198.33	66.14	65.21	56.74	62.7	65.29
2	8	137	30.8	16.41	215.4	203.1	198.4	205.63	211.2	212.4	197.6	207.07	191.35	146.7	135.6	157.88	139.75	142.05	142.35	141.38	107	98.25	103.25	102.83	99.25	105.25	100.75	101.75	630	610	560	600	630	610	600	613.33	465	420	310	398.33	350	365	390	368.33	94.01	96.54	86.5	92.35	93.15
2	7	120.5	22.6	15.5645	163.7	140.9	163.6	156.07	144.7	180.2	158.2	161.03	142.1	95.85	102.95	113.63	75.25	119.6	91.15	95.33	107.5	99.75	105.75	104.33	98.75	114	107.25	106.67	630	550	660	613.33	560	680	630	623.33	550	400	240	396.67	275	475	240	330	104.36	89.94	77.25	90.52	82.22
2	12	176.4	80.7	25.9344	122.7	123.9	114.6	120.4	135	122.6	123.6	127.07	87.2	84.8	92.2	88.07	89.1	87.2	85.8	87.37	89	87.75	77.25	84.67	91	87.75	87.5	88.75	640	630	590	620	660	620	620	633.33	400	385	390	391.67	290	270	365	308.33	74.94	75.38	84.14	78.15	72.91
2	12	151.5	38.1	16.5997	193.9	197.4	191.6	194.3	196	192.8	197.7	195.5	139.35	114.7	118.55	124.2	159.8	119.35	111.9	130.35	95.5	110.75	108.5	104.92	110	110	110.25	110.08	730	740	730	733.33	730	720	710	720	300	250	285	278.33	350	235	280	288.33	82.97	73.53	76.94	77.81	78.17
2	12				96.9	100.3	116.5	104.57	96.2	100.5	115.4	104.03	112.05	120.5	128.6	120.38	100.6	123.3	180.05	134.65	76	83.25	84	81.08	79	80.5	82.25	80.58	590	580	680	616.67	590	580	640	603.33	455	450	455	453.33	385	345	425	385	77.83	70.8	68.96	72.53	68.99
2	9	161	38.9	15.0071	242.6	215.8	223.3	227.23	221.4	220.5	214.3	218.73	142.2	172.95	129.35	148.17	185.75	119.15	129.25	144.72	129.25	118.75	130.25	126.08	121	119.25	122.75	121	650	600	600	616.67	640	600	590	610	405	530	340	425	530	310	345	395	89.31	98.4	86.31	91.34	86.31
2	9	144.7	38.3	18.292	240.4	232.7	242.1	238.4	237.5	233.6	244.5	238.53	187.6	143.45	243.25	191.43	231.95	147.45	151.1	176.83	102	99.5	99.25	100.25	104.75	104.5	105.75	105	630	580	610	606.67	600	590	620	603.33	445	375		410	670	440	425	511.67	115.01	115.09	114.76	114.95	110.2
2	9	142	29.3	14.5308	152.3	164.9	157.1	158.1	166	170.1	164	166.7	85.35	94.85	90.25	90.15	120.45	116.55	98.95	111.98	97.25	99.75	101.75	99.58	103.5	108	106.25	105.92	620	670	640	643.33	690	690	670	683.33	235	220	220	225	365	320	220	301.67	77.01	73.08	76.61	75.57	74
2	9	139.7	38.8	19.881	222.4	215.9	234.8	224.37	223.7	204.4	227.1	218.4	124.35	115.8	122.4	120.85	124.8	110	133.15	122.65	112.25	111	114.75	112.67	110.75	114.25	113.5	112.83	680	660	710	683.33	680	640	690	670	320	285	280	295	275	295	325	298.33	83.94	79.68	79.67	81.1	84.09
2	12	154	51.3	21.631	420.3	420.7	407.6	416.2	429	416.3	435.6	426.97	256.7	198.55	214.65	223.3	276.7	217.45	220.25	238.13	152.75	153	156	153.92	154	156.25	153.25	154.5	700	710	670	693.33	690	670	680	680	650	540	610	600	805	630	690	708.33	112.65	114.17	111.25	112.69	116.71
2	8				148	146.3	140.8	145.03	147.7	154	157.2	152.97	146.2	118	106.25	123.48	123	115.1	113.85	117.32	109.75	113.25	117.5	113.5	106	111	110.75	109.25	520	510	500	510	520	550	550	540	440	450	445	445	480	430	515	475	86.06	86.7	84.16	85.64	87.89
2	6	124	23.6	15.3486	175.9	145.4	142.4	154.57	167.7	177.7	153.3	166.23	169.15	161	128.15	152.77	140.4	129.7	123.75	131.28	106.5	98.25	105	103.25	107.75	112	109.75	109.83	800	720	690	736.67	760	780	690	743.33	385	430	425	413.33	290	405	335	343.33	67.63	66.83	66.64	67.03	63.58
2	10	149.9	35.1	15.6208	126.6	119	135.3	126.97	127.8	119.6	131.7	126.37	87.95	82.8	93.1	87.95	89.4	81.6	88.35	86.45	96.25	108.5	102.75	102.5	97.75	97.75	99.25	98.25	610	570	640	606.67	620	580	610	603.33	265	270	260	265	220	295	245	253.33	67.86	62.41	66.45	65.57	70.36
2	8	145	40	19.025	176	190.3	201.2	189.17	197.7	193	200	196.9	115.4	139.55	143.15	132.7	184.9	128.25	121.45	144.87	111.75	119	111	113.92	103.75	114.5	115.25	111.17	540	570	590	566.67	590	570	610	590	375	415	365	385	470	325	320	371.67	88.03	84.71	94.2	88.98	102.24
2	12	160	51.8	20.2344	389.7	404	383	392.23	395.6	397.4	372.2	388.4	242.95	163.25	174.05	193.42	191.45	163.95	183.85	179.75	160	161.5	156.75	159.42	150.25	149	148	149.08	700	660	640	666.67	650	660	630	646.67	665	340	380	461.67	460	370	480	436.67	109.77	109.35	110.78	109.97	117.4
2	11	143.4	45.7	22.2238	321.5	314.4	319.3	318.4	334.8	323.1	343.4	333.77	156.35	135.3	153.9	148.52	167.8	173.9	197.75	179.82	145.75	148.25	150.5	148.17	151.5	146.5	152.25	150.08	660	660	660	660	680	670	690	680	490	335	450	425	520	520	505	515	108.89	102.7	109.53	107.04	101.02
2	9	132.2	25.1	14.3619	219.1	227.9	238.1	228.37	231.3	229.7	233	231.33	162.3	145.9	152.1	153.43	151.45	131.15	156.3	146.3	120	121	121.75	120.92	124.25	123	123.5	123.58	630	640	660	643.33	650	630	650	643.33	395	425	445	421.67	410	450	385	415	97.72	96.7	99.24	97.89	93.34
2	11	154	67.9	28.6305	346.6	337.6	348.1	344.1	340.2	334.7	344.7	339.87	237.8	216.65	314	256.15	226.15	249.6	359.65	278.47	144	141	133.25	139.42	141.75	140	131	137.58	670	670	690	676.67	680	670	690	680	845	785	965	865	635	870	955	820	120.43	115.8	116.44	117.56	97.74
2	6	119.8	22.1	15.3985	109	113.9	111.1	111.33	107.6	115.6	116	113.07	84.75	112.4	113	103.38	119.6	122	142.25	127.95	75.75	79.25	77.75	77.58	72.75	87.25	80.5	80.17	640	660	640	646.67	670	660	650	660	205	370	355	310	405	425	310	380	60.02	61.36	65.53	62.3	63.88
2	8				328.6	327	335.5	330.37	347.7	301.5	306.6	318.6	189.85	211.8	140.5	180.72	161.2	171.25	220.75	184.4	129.75	133.25	135	132.67	133.25	135.5	130.5	133.08	820	740	750	770	820	750	760	776.67	460	430	325	405	350	490	640	493.33	94.64	98.83	100.37	97.95	93.08
2	14				104.3	122.7	103.4	110.13	134.2	106.1	92.5	110.93	97	97.5	97.2	97.23	96.1	87.6	75	86.23	87.25	92.75	85.5	88.5	92.75	92.25	93	92.67	550	570	550	556.67	680	570	520	590	275	215	255	248.33	315	390	235	313.33	67.13	65.85	77.76	70.25	71.09
2	12	141.5	32.4	16.182	112.2	114	112.7	112.97	115.7	113.8	127.4	118.97	83.3	86.6	86.7	85.53	104.45	77.25	84.1	88.6	102.25	98.75	92.5	97.83	111.25	118.5	123.75	117.83	590	520	520	543.33	530	530	540	533.33	360	410	350	373.33	605	270	385	420	86.82	78.35	75.99	80.39	78.96
2	12	145.7	35.6	16.7699	263	251.5	222.6	245.7	259.3	238.8	221.5	239.87	165.55	173.15	115.2	151.3	152.75	125.5	126.4	134.88	111.5	110	113.75	111.75	121.25	109.75	130.75	120.58	700	660	600	653.33	680	660	580	640	415	525	355	431.67	435	355	340	376.67	97.98	94.33	88.74	93.68	91.89
2	13	169.4	79	27.5296	207.6	190.2	186.7	194.83	203.1	201	205.1	203.07	178.5	192.2	160.95	177.22	155.55	205.6	169.35	176.83	119.25	83	92.75	98.33	123.25	112.25	128	121.17	690	630	610	643.33	680	680	650	670	470	500	465	478.33	490	435	465	463.33	84.42	120.12	102.74	102.43	88.95
2	14	170	50.6	17.5087	205.4	213	220.6	213	218	202.9	213.4	211.43	131.7	211.2	170.6	171.17	112.45	127.8	186.7	142.32	106.5	102.75	96.5	101.92	99	99.5	99.25	99.25	700	800	780	760	740	710	730	726.67	290	510	505	435	255	265	510	343.33	76.9	74.68	86.99	79.52	83.47
2	13	177.1	60.9	19.4169	149	161.3	165.6	158.63	151	159.2	154.4	154.87	111.55	113.15	107.1	110.6	103.55	97.7	141.4	114.22	103	109.75	114.75	109.17	111.25	107.75	107	108.67	540	610	580	576.67	570	590	550	570	365	300	390	351.67	330	285	440	351.67	91.6	80.09	85.78	85.82	87.13
2	8	134	26.3	14.6469	99.8	85.2	141.2	108.73	96.3	159.9	157.6	137.93	87.3	77.4	85.05	83.25	81.65	137.7	95.5	104.95	99.5	91.75	93	94.75	90.75	96.25	91.25	92.75	440	430	670	513.33	450	760	730	646.67	390	320	225	311.67	305	300	230	278.33	70.01	75.23	70.58	71.94	70.52
2	7	131.3	28.9	16.7636	230.2	227.1	247	234.77	205.9	245.6	259.2	236.9	124.9	115.35	124	121.42	121.65	125.85	136.7	128.07	131.75	123.75	128.5	128	113	122.5	126.25	120.58	700	730	750	726.67	660	770	810	746.67	315	225	285	275	265	235	315	271.67	80.3	71.15	79.76	80.03	91
2	10	138.6	29	15.0963	145.7	134.3		140	149.2	137.2	193.8	160.07	176.4	78		127.2	153.35	116.1	176.3	148.58	86.5	101		93.75	83	100.25	108.25	97.17	800	680		740	810	750	970	843.33	440	170		305	380	265	920	521.67	67.49	57.83		62.66	81.14
2	7				130.1	146.9	135.7	137.57	133.6	127.7	143.6	134.97	122.65	115	126.15	121.27	107.35	113.8	105.4	108.85	77.75	93	78	82.92	100.75	73.5	84.25	86.17	630	690	640	653.33	630	630	660	640	305	280	315	300	310	260	260	276.67	76.13	71.61	80.5	76.08	74.22
2	9	140	33.8	17.2449	281.6	306.5	301.7	296.6	286.4	305.4	293.4	295.07	109.8	156.7	187.75	151.42	133.15	176.05	129.1	146.1	145	162.5	151	152.83	149.5	170.25	156.25	158.67	700	690	670	686.67	690	670	690	683.33	260	355	485	366.67	355	450	295	366.67	77.42	86.02	80.32	81.25	75.89
2	10	141.7	44	21.9136	282.4	286.5	264.4	277.77	278.3	287.2	282.6	282.7	126.4	139.7	130.25	132.12	133.65	130.2	134.8	132.88	118.25	122.75	128.5	123.17	130.5	133.25	130.25	131.33	670	670	620	653.33	630	670	640	646.67	340	345	340	341.67	380	350	430	386.67	107.16	106.34	106.92	106.807	109.2
2	6	119.2	20.1	14.1463	182.6	174.5	175.7	177.6	167.8	165.3	182	171.7	147.4	99.1	119.4	121.97	121	93.6	93.35	102.65	103.5	112.25	112.5	109.42	100.25	107.25	108.75	105.42	980	650	660	763.33	660	620	690	656.67	390	245	280	305	280	235	215	243.33	78.72	71.87	75.53	75.37	78.57
2	14	177.2	67.5	21.4969	129.1	123.9	119.7	124.23	120.5	124.2	120.5	121.73	139.55	107.75	104.55	117.28	125.05	103.25	126.4	118.23	92.25	99.5	95.5	95.75	97.75	97	97.5	97.42	670	600	590	620	620	620	610	616.67	435	405	395	411.67	365	330	360	351.67	62.55	59.91	61.9	61.45	62.85
2	8				164.8	161.9	162.9	163.2	181.8	167.7	157.5	169	118.45	84.6	81.35	94.8	172	107.65	81	120.22	95.25	103	104	100.75	98	102	109.5	103.17	720	690	680	696.67	770	740	690	733.33	390	240	270	300	465	320	220	335	61.48	62.65	64.44	62.86	79.21
2	7	121.4	23.7	16.0809	327.3	337.8	366.2	343.77	357.6	332.9	335.6	342.03	198.65	207.45	242.3	216.13	162.55	160.4	166.2	163.05	140	143.25	153.25	145.5	162	150	145	152.33	730	730	760	740	740	710	720	723.33	460	475	575	503.33	350	385	350	361.67	95.07	90.02	91.76	92.28	92.58
2	9	139.5	35.6	18.2937	229.8	239.7	233.1	234.2	250.1	247.7	252.7	250.17	92.45	96	100.1	96.18	144.05	132.45	126	134.17	125.25	137	142.25	134.83	151.25	144.75	148	148	560	600	560	573.33	570	600	580	583.33	290	360	330	326.67	405	370	365	380	87.91	76.77	87.95	84.21	104.96
2	6				128.3	124.5	141.2	131.33	125.3	159.1	141.9	142.1	136.7	108.7	160.15	135.18	170.15	174.5	141.05	161.9	90.5	98.75	86.75	92	92.75	94.5	95.75	94.33	620	590	700	636.67	600	730	680	670	430	370	520	440	635	645	580	620	73.83	67.04	75.04	71.97	79.84
2	6	116.6	18.9	13.9016	267.8	252.3	263.5	261.2	283.4	278.4	289.1	283.63	189.6	179.45	181.15	183.4	178.7	162.6	201.85	181.05	131.25	128.5	135.25	131.67	133.25	137.25	133.75	134.75	660	630	640	643.33	690	660	670	673.33	545	460	520	508.33	455	410	590	485	104.51	102.2	97.62	101.44	95.18
2	14	174.4	49.5	16.2747	298.6	268.2	249.9	272.23	271	272.9	247.1	263.67	182.95	180.3	135.05	166.1	135.5	196.15	152.2	161.28	130	140.75	136.75	135.83	124	130.25	129.25	127.83	800	710	690	733.33	730	710	640	693.33	475	405	320	400	295	505	415	405	89.15	82.24	75.03	82.14	87.78
2	11	139.9	32.2	16.4521	276.9	273.3	284.2	278.13	269.8	266.8	299.5	278.7	149.4	196.45	171.3	172.38	154.3	163.1	164.65	160.68	149	147.25	145.75	147.33	151	148	156.75	151.92	610	620	650	626.67	580	580	640	600	575	630	505	570	540	670	540	583.33	102.51	101.82	96.46	100.26	106.42
2	11	160.5	60.7	23.5634	113.8	107.7	102.8	108.1	109.5	110	101.4	106.97	94.8	96.35	98.65	96.6	97.85	93.8	90.4	94.02	92.25	93.75	94	93.33	89.25	92.5	91.5	91.08	590	540	510	546.67	590	530	510	543.33	325	495	490	436.67	325	415	370	370	70.04	77.69	75.85	74.53	70.31
2	14	169.5	54.1	18.8303	307.4	301	305.4	304.6	284.6	294.3	297.9	292.27	253.2	156.1	168.3	192.53	246.7	252.65	397.55	298.97	172.75	160	174.25	169	156.25	150.25	153	153.17	780	760	730	756.67	730	760	780	756.67	545	335	370	416.67	650	600	935	728.33	75.34	85.06	85.52	81.97	88.25
2	11	150.3	39.2	17.3527	134.6	137.3	124.9	132.27	128	129.6	123	126.87	119.2	100	107.85	109.02	107.05	93.65	99.3	100	93.75	91.75	90.5	92	94.75	89.75	92.75	92.42	620	690	570	626.67	620	620	570	603.33	330	235	250	271.67	275	240	265	260	74.8	62.96	69.57	69.11	69.2
2	9	148	49	22.3703	93.5	99.3	95	95.93	105.9	102.1	94.2	100.73	73.9	82.4	67.25	74.52	78.5	67.35	83.9	76.58	93	92.25	95.75	93.67	96.5	92.25	96	94.92	620	630	600	616.67	660	650	600	636.67	180	210	160	183.33	210	155	240	201.67	56.6	60.91	60.1	59.2	62.91
2	7	123.9	22.2	14.4614	349.3	320	312.8	327.37	317	336.3	298.7	317.33	186.2	160.25	259.65	202.03	170.95	189	197.55	185.83	136	143	135.75	138.25	141.75	141.25	135.25	139.42	750	690	680	706.67	660	670	650	660	515	330	660	501.67	515	505	555	525	101.27	96.63	115.04	104.31	97.72
2	9	153	44.6	19.0525	115.2	147.9	121.3	128.13	151.8	139.1	136.3	142.4	140	133.7	136.6	136.77	91.15	93.3	125.9	103.45	104.5	111	123	112.83	135.75	126	130	130.58	570	640	550	586.67	650	610	590	616.67	475	425	710	536.67	400	365	570	445	78.23	80.84	94.07	84.38	69.56
2	8	143.5	30.8	14.9571	101.8	88.7	104.2	98.23	116	101.6	104.3	107.3	154.15	133.55	134.85	140.85	173.25	127.9	106.2	135.78	77.25	80.75	80.25	79.42	86	78	79	81	520	480	510	503.33	560	510	530	533.33	660	670	725	685	845	615	495	651.67	97.27	86.19	96.99	93.48	100.86
2	10	144.2	42.3	20.3428	147.6	138.3	145.1	143.67	163.7	157	152.9	157.87	183.4	148.1	137.65	156.38	166.1	153.3	149.6	156.33	24.25	89.25	97	70.17	91	98.25	98.25	95.83	640	570	570	593.33	660	610	600	623.33	490	495	480	488.33	510	650	570	576.67	81.82	81.15	73.74	78.9	83.61
2	13	160.5	45.8	17.7793	285.8	275.9	261.5	274.4	284.7	275.2	288.8	282.9	192.35	177.2	145	171.52	154.35	188.7	201	181.35	137	139.75	139	138.58	127	128.5	146	133.83	640	640	600	626.67	640	640	680	653.33	685	555	425	555	370	615	640	541.67	103.39	99.47	114.77	105.877	117.03
2	11	149	50.1	22.5666	196.6	196.3	193.2	195.37	213	208.7	203.3	208.33	120	113.9	110.8	114.9	116.6	122.15	142.55	127.1	112.75	113.5	116.25	114.17	116.5	117.75	119.75	118	590	610	600	600	660	650	620	643.33	385	320	310	338.33	285	295	335	305	92.61	87.5	85.2	88.4367	86.08
2	7	122	24.2	16.2591	152.4	149.1	145.6	149.03	159.5	148.7	145.1	151.1	98.45	108.3	100.85	102.53	103.85	97.1	99.15	100.03	100.5	100	104.75	101.75	103	106.25	103	104.08	630	610	590	610	630	580	560	590	265	345	310	306.67	270	270	320	286.67	78.92	84.09	80.3	81.1	83.3
2	9	131.5	26.8	15.4983	108.6	121.5	115.6	115.23	105	103.8	111.7	106.83	108.35	114.15	104.1	108.87	84.6	86.4	94.75	88.58	77.75	76.5	78.25	77.5	77.75	80	82.25	80	590	660	660	636.67	600	600	640	613.33	330	320	245	298.33	220	280	245	248.33	68.18	68.46	61.28	65.97	58.94
2	7	129.2	26.4	15.8154	108.1	106.7	106.9	107.23	119.4	115.5	116.3	117.07	81.85	89.55	89.7	87.03	97	112.5	93.6	101.03	88.5	98.75	96.75	94.67	97.5	96.25	103	98.92	540	510	520	523.33	570	530	520	540	240	405	415	353.33	355	410	460	408.33	66.51	73.7	74.97	71.73	72.59
2	12	166.5	56.9	20.525	189	160.4	154.4	167.93	173.7	165.6	153.3	164.2	141.3	123.7	127.4	130.8	134.05	118.4	109.1	120.52	112.25	110	104	108.75	106	100.75	101.25	102.67	580	520	490	530	590	530	490	536.67	510	685	685	626.67	380	555	685	540	99.38	114.07	119.82	111.09	94.82
2	11	143	32.3	15.7954	263.2	258.7	241.3	254.4	267.9	278.8	229.8	258.83	131.35	132.6	117.55	127.17	137.85	146.15	105.05	129.68	120	120.25	118	119.42	119.5	126.25	122.5	122.75	640	620	590	616.67	640	630	550	606.67	345	335	395	358.33	365	350	295	336.67	103.07	96.09	104.38	101.18	104.49
2	12	161.5	47	18.0199	308	339.3	317.4	321.57	316	308.8	316.9	313.9	214.2	187.6	162.55	188.12	202.3	227.25	238.75	222.77	115.25	121.75	127	121.33	120.75	116	125.5	120.75	730	790	730	750	750	770	740	753.33	450	360	370	393.33	450	515	475	480	99.97	91.71	101.06	100.52	112.15
2	7	127	26.7	16.554	134.4	126	116.9	125.77	131.9	129.9	119.6	127.13	115.95	82.7	84.6	94.42	96.35	95.3	106.25	99.3	107.5	100.25	104.75	104.17	96.5	99.25	96.5	97.42	590	570	530	563.33	560	540	520	540	450	245	410	368.33	360	395	385	380	82.53	69.51	82.23	78.09	85.14
2	13	162.5	53.9	20.4118	364.2	386.5	327.1	359.27	362.1	349	346.4	352.5	307.6	285.7	256.05	283.12	209	208.3	193.05	203.45	120	129.5	127.75	125.75	126.75	127.75	132.75	129.08	800	840	720	786.67	800	790	760	783.33	730	675	745	716.67	395	490	420	435	113.38	103.06	111.85	109.43	104.38
2	15	164	47.2	17.5491	145.1	127.7	142.1	138.3	148.2	121.3	139.4	136.3	131.4	129.45	144.6	135.15	154.9	126.4	146.55	142.62	82.25	81.25	86.25	83.25	83.25	82.75	79	81.67	710	620	670	666.67	730	600	670	666.67	330	380	350	353.33	360	405	325	363.33	74.27	87.15	77.19	79.54	81.31
2	8	131.4	27.9	16.159	151.4	121.1	153.8	142.1	147.4	198	169.2	171.53	139.65	147	223.75	170.13	228.7	206.85	197.55	211.03	79.5	66.5	82.5	76.17	76.5	65.25	90	77.25	950	810	1010	923.33	930	1230	1020	1060	265	250	395	303.33	430	240	430	366.67	60.49	55.92	62.85	59.75	59.46
2	7	128.1	27.8	16.9413	149.9	130.9	136.6	139.13	146.6	129.5	135.9	137.33	161.9	160.25	163.2	161.78	147.85	135.95	138.55	140.78	111.5	101.5	103.5	105.5	110.25	103.75	97.75	103.92	590	520	550	553.33	580	510	540	543.33	660	870	785	771.67	600	665	645	636.67	89.39	108.68	105.79	101.29	102.3
2	9	134	30.9	17.2087	103	96.6	114.7	104.77	95.4	114.4	117.8	109.2	69.95	62.8	91.1	74.62	56.45	77.75	83.95	72.72	94.25	89.25	95.75	93.08	89.5	90	90.75	90.08	500	470	550	506.67	470	530	580	526.67	225	200	260	228.33	215	290	250	251.67	62.53	65.14	72.22	66.63	61.76
2	13	153.3	62.3	26.5096	79.5	80	85.1	81.53	78.9	85.1	81.1	81.7	94.95	95.7	91.3	93.98	62.75	79.6	139.7	94.02	73.75	71.25	79	74.67	80.5	82.5	66.75	76.58	480	500	520	500	480	500	490	490	505	340	430	425	335	370	485	396.67	83.41	71.02	74.16	76.2	68.42
2	8	134	26.8	14.9254	92	79.2	75.7	82.3	73.5	76.3	76.5	75.43	84.65	82.55	78.95	82.05	78.5	72.95	79.05	76.83	81.25	72.25	73.75	75.75	72.75	72.5	71.75	72.33	540	490	470	500	450	480	460	463.33	460	450	460	456.67	480	440	475	465	69.58	79.67	77.12	75.46	78.64
2	8				91.4	101.5	87.7	93.53	99.1	99.6	100.4	99.7	97.2	77.95	84.45	86.53	79.05	73.15	91.1	81.1	85.25	86.5	87	86.25	91	85.75	95	90.58	530	570	500	533.33	580	570	550	566.67	310	235	295	280	220	245	305	256.67	75	63.71	70.26	69.66	67.23
2	12	156.1	44.8	18.3854	108.9	114.4	90.4	104.57	104.3	87.7	109.7	100.57	97.65	84.35	74.05	85.35	78.15	65.7	83.05	75.63	80	87.25	92.5	86.58	82.75	94.75	84.5	87.33	610	620	480	570	570	470	550	530	255	220	300	258.33	245	285	345	291.67	74.09	67.19	66.95	69.41	65.5
2	6	126	24.9	15.6841	268.1	196.6	213	225.9	233.3	210.3	211.1	218.23	173.35	154.05	126.6	151.33	141.55	192.5	153	162.35	122.75	116.5	127	122.08	126	131	127	128	860	690	700	750	870	710	720	766.67	775	350	335	486.67	405	500	470	458.33	103.49	75.23	79.09	85.94	68.4
2	13	177.1	68.5	21.84	253.3	239.4	232.8	241.83	254.5	222.3	215.7	230.83	140.75	138.55	168.7	149.33	211.95	143.1	161.5	172.18	118	120.75	122	120.25	119	118.75	114.25	117.33	680	630	630	646.67	720	620	620	653.33	365	490	510	455	590	410	470	490	93.77	103.11	97.76	98.21	90.76
2	11	154.5	39.2	16.4221	352	342.6	338.9	344.5	353.6	325.7	348.1	342.47	196.6	193.65	203.2	197.82	200.3	177.1	183	186.8	132.25	140	132.5	134.92	132.75	137.75	136	135.5	710	670	670	683.33	700	650	700	683.33	385	475	630	496.67	460	415	460	445	117.48	114.55	113.82	115.28	118.17
2	6	123	21.2	14.0128	99.4	99	97.4	98.6	95.8	92.3	97.8	95.3	117.5	121.1	102	113.53	108.25	108.7	96.7	104.55	69	67.25	74.25	70.17	81.75	75.5	82.75	80	600	600	580	593.33	590	570	590	583.33	345	300	290	311.67	290	330	255	291.67	75.65	69.89	71.82	72.45	67.06
2	7	135.5	26	14.161	219.5	213.2	233.5	222.07	214.7	207.8	237.8	220.1	121.15	136.5	123.6	127.08	130	101.8	130.1	120.63	120.25	119.75	119.75	119.92	115	120.25	121.25	118.83	610	600	630	613.33	580	560	630	590	405	395	405	401.67	470	485	390	448.33	89.65	84.87	90.02	88.18	91.35
2	9	134.6	38.1	21.0298	186	174	141.5	167.17	200.3	128.2	141.3	156.6	139.7	151.4	103.95	131.68	147.25	93	102.7	114.32	94	96.75	98.5	96.42	105	96.5	102.5	101.33	800	770	630	733.33	900	570	650	706.67	380	355	260	331.67	255	265	230	250	80.93	83.35	70.29	78.19	71.92
2	8	134	27.8	15.4823	207.8	231.4	191.2	210.13	210	219.4	210.7	213.37	178.9	166.55	133.95	159.8	239.7	234.2	159.1	211	112.25	111.75	108.5	110.83	94	94	110.25	99.42	690	780	630	700	700	740	700	713.33	545	370	415	443.33	590	610	505	568.33	94.12	76.47	88.99	86.53	102.13
2	9	138.4	35.1	18.3246	139	119.1	123.6	127.23	121.7	139	167.9	142.87	194.3	118.65	156.85	156.6	149.7	148.95	177.6	158.75	83.25	87.25	87.25	85.92	84.25	84.75	97.75	88.92	680	570	610	620	570	620	790	660	480	375	455	436.67	605	505	475	528.33	82.03	77.82	81.59	80.48	96.74
2	7	128.5	25.5	15.4431	178.5	175.6	187.7	180.6	201.8	183		192.4	102.75	112.85	107.15	107.58	145.3	106.1		125.7	108.25	106	110.5	108.25	114.75	111		112.88	620	610	620	616.67	640	620		630	300	380	320	333.33	305	290		297.5	77.17	82.98	84.85	81.67	82.49
2	8				184.3	176.1	176.8	179.07	178.1	175	176.3	176.47	157.7	156.2	156.25	156.72	137.5	145.95	148.7	144.05	102.5	103.75	108.5	104.92	115	106.75	107	109.58	530	510	510	516.67	530	500	500	510	710	915	895	840	445	635	630	570	106.32	109.67	104.54	106.84	94.63
2	6	123.7	24.6	16.0767	352.7	323.9	322.3	332.97	306	296.3	316.8	306.37	246	256.45	300.35	267.6	203.35	207.45	213.65	208.15	145.5	150	155	150.17	148.75	149	144.75	147.5	720	720	700	713.33	660	660	660	660	590	525	715	610	465	560	495	506.67	107.34	96.02	90.31	97.89	95.79
2	9	133.1	27.1	15.2972	271.4	251.1	262.5	261.67	256.6	257.8	261.4	258.6	155.2	156.7	146.95	152.95	122.85	138.35	134.2	131.8	138	125.5	138	133.83	135	141.25	137.75	138	700	680	680	686.67	720	660	680	686.67	325	400	365	363.33	260	325	315	300	96.71	90.55	96.31	94.52	85.98
2	12	153.5	40.7	17.2734	126.7	120.5	119.5	122.23	129	122.5	114.4	121.97	94	82.8	78.25	85.02	88.85	81.05	83.35	84.42	91.5	93.25	91.25	92	87.5	84.75	83	85.08	570	530	510	536.67	550	540	490	526.67	330	310	255	298.33	285	230	310	275	77.34	74.76	72.96	75.02	80.04
2	12	160.3	39.3	15.2942	314.8	261.6	294.8	290.4	329.5	289.6	278.1	299.07	184.8	160.55	257.3	200.88	192.9	168.5	151.5	170.97	119.75	112.75	107.75	113.42	108.25	111.5	124.75	114.83	960	720	800	826.67	970	790	770	843.33	295	425	515	411.67	305	290	295	296.67	78.19	95.34	106.4	93.31	92.61
2	12	162.8	64.6	24.3738	315.6	334.5	302.7	317.6	283.1	314.8	310.2	302.7	221.7	183.05	175.15	193.3	191.35	219.85	218.8	210	119	124.75	121.75	121.83	124.5	129.25	126.75	126.83	800	930	800	843.33	750	920	830	833.33	480	380	440	433.33	460	450	535	481.67	98.87	90.76	95.49	95.04	86.71
2	11	141.5	35.8	17.8801	298.9	255.1	249.4	267.8	259	248.7	257	254.9	162.25	131.3	127.2	140.25	134.1	149.15	114.8	132.68	155.5	155.75	156.5	155.92	146.75	145.5	143.5	145.25	700	620	610	643.33	650	620	620	630	475	465	575	505	350	385	330	355	96.33	93.82	88.08	92.74	85.82
2	10	142.4	34.7	17.1123	116.3	116.4	122.5	118.4	119.4	121.5	109	116.63	73.5	69.95	86.85	76.77	95.8	82.45	78.85	85.7	89.25	92.25	90.5	90.67	88	94.25	94	92.08	590	560	580	576.67	650	580	540	590	190	205	275	223.33	260	235	225	240	60.32	65.99	75.07	67.13	61.39
2	9	136.7	28.7	15.3584	183.4	150.9	156.4	163.57	173.4	149.2	164.4	162.33	122.2	141.8	148.1	137.37	126.6	130.1	132.8	129.83	108.5	112	112	110.83	114.25	108.75	106.75	109.92	720	560	610	630	680	570	610	620	275	795	570	546.67	390	660	550	533.33	74.62	98.29	84.29	85.73	74.47
2	12	165.2	57.1	20.9226	165.9	154.8	142.9	154.53	158.5	147.4	147.7	151.2	99.3	101.1	99.8	100.07	104.7	90.15	97.05	97.3	115.5	114.5	107	112.33	103.75	103.5	107.75	105	710	640	620	656.67	680	630	630	646.67	240	285	290	271.67	270	275	260	268.33	69.03	76.28	77.52	74.28	76.58
2	11	153.7	45.6	19.3027	191.3	176.1	164.7	177.37	190	165.6	158.3	171.3	201.65	235.5	280.45	239.2	204.3	177.15	229.3	203.58	105.25	112.25	102.25	106.58	111.5	104.25	121.25	112.33	780	690	670	713.33	800	690	680	723.33	495	580	830	635	435	545	775	585	73.55	75.63	81.87	77.02	70.03
2	6	122.8	25.8	17.1089	110.6	105.1	103.3	106.33	109.3	118.8	112.5	113.53	85.8	134.75	119.15	113.23	83.85	108.45	95.3	95.87	90	81	93	88	90	86.5	88.75	88.42	620	610	580	603.33	600	620	570	596.67	360	435	315	370	235	300	380	305	73.44	70.43	64.74	69.54	64.17
2	10	145.3	39.6	18.757	128.5	118	109.4	118.63	114.9	114.9	110.7	113.5	172.25	174.75	177.25	174.75	128.75	111.5	129.2	123.15	82.5	83.25	75.25	80.33	82.75	82.25	81	82	620	550	540	570	570	550	520	546.67	520	535	550	535	475	510	650	545	74.77	72.76	84.63	77.39	68.93
2	13	134.5	30.9	17.081	128.1	122.7	128.5	126.43	133.6	125.3	139.2	132.7	89.45	84.95	91.95	88.78	88.85	85.75	91.95	88.85	70	73.25	70.25	71.17	77.5	74.75	79	77.08	620	600	600	606.67	620	600	630	616.67	240	275	275	263.33	280	260	260	266.67	86.95	85.99	91.19	88.04	85.37
2	9	134.6	31.5	17.3868	137.9	126.4	116.8	127.03	136.9	137.9	117.4	130.73	151.4	116.9	92.9	120.4	119.55	100.2	96.1	105.28	97	97	99.25	97.75	93.75	97.75	91.75	94.42	590	550	500	546.67	580	580	510	556.67	495	595	490	526.67	510	460	620	530	87.72	91.29	88.61	89.21	97.97
2	9	168.2	64.3	22.7279	133.2	143.3	151.4	142.63	151.9	171.7	162.5	162.03	83.05	78.6	137.4	99.68	109.1	99.1	104.15	104.12	104.5	100.25	89.25	98	103.75	107.25	107.5	106.17	510	540	580	543.33	550	620	570	580	285	235	385	301.67	355	250	450	351.67	68.84	75.67	88.71	77.74	88.88
2	12	162	49.7	18.9377	146	143.9	148.6	146.17	139.2	147.5	143.3	143.33	94.05	101.35	103.25	99.55	99.05	97.45	110.4	102.3	81.5	85.25	92	86.25	80.75	90.5	90.75	87.33	630	640	660	643.33	650	630	650	643.33	235	350	385	323.33	350	260	280	296.67	80.69	83.36	82.08	82.04	86.41
2	8				234.7	246.7	267.9	249.77	265.8	256.6	250.4	257.6	125.65	148.5	142.8	138.98	197.8	172.85	146.25	172.3	126.25	128.25	132	128.83	123.75	128	129.25	127	690	700	760	716.67	800	780	810	796.67	370	425	415	403.33	515	430	280	408.33	86.11	82.5	85.21	84.61	87.63
2	14	166.9	77.1	27.6784	147	155.7	152.3	151.67	140	139.9	151.3	143.73	110.05	105.85	95.1	103.67	97.35	89.4	101.65	96.13	92.5	94.75	106.5	97.92	98	106.25	109.5	104.58	590	620	630	613.33	560	570	590	573.33	495	365	215	358.33	325	270	515	370	82.23	73.32	66.88	74.14	75.28
2	10	141.6	32.4	16.1591	98.3	99.8	109.6	102.57	95.1	111.8		103.45	83.65	80.7	87.3	83.88	93.2	90.95		92.08	95	89.75	96.25	93.67	95	97.25		96.13	490	490	540	506.67	480	550		515	285	295	265	281.67	360	265		312.5	72.29	77.05	73.17	74.17	80.14
2	8				185.1	182	190	185.7	194.7	189.2	196.1	193.33	238.05	374.6	220.1	277.58	187.4	207.6	202.9	199.3	95.25	91.75	100.75	95.92	110.5	105.25	103.25	106.33	590	610	590	596.67	610	610	620	613.33	760	945	780	828.33	540	590	810	646.67	111.59	104.4	107.63	107.87	91.95
2	12	150	38.8	17.2444	174.6	153.8	167.1	165.17	174.6	175.3	162.9	170.93	100.15	82	83.45	88.53	101.45	92.35	93.95	95.92	131.25	122.5	143.5	132.42	124.5	120.25	121	121.92	620	550	560	576.67	630	600	580	603.33	260	270	265	265	255	285	255	265	68	70.83	64.04	67.62	69.43
2	10	147	37.6	17.4002	337.3	345.6	276.5	319.8	309.8	329.1	238	292.3	209	196.15	136.2	180.45	156.7	180.75	146.1	161.18	178.5	172.5	177.75	176.25	174.25	176	169	173.08	630	640	540	603.33	620	640	540	600	670	610	525	601.67	470	545	665	560	114.87	112.87	95.92	107.89	101.64
2	9	140.4	31.8	16.1322	280.9	290	260.7	277.2	279.2	285.1	268.8	277.7	166.95	150.6	191.2	169.58	157.85	168	153.95	159.93	144.5	145.5	148.5	146.17	146.25	145.25	146.75	146.08	760	760	700	740	740	780	710	743.33	370	340	570	426.67	315	295	320	310	89.25	81.64	86.41	85.77	81.6
2	8				174.5	170.2	177.9	174.2	166.2	166.9	163.6	165.57	131	120.25	138.65	129.97	107.5	108.15	113.05	109.57	102.75	101.75	102.75	102.42	103	102.75	103	102.92	590	590	600	593.33	600	580	590	590	460	370	550	460	285	360	340	328.33	94.2	83.67	98.72	92.2	81.03
2	10	148.1	35.7	16.2764	134.5	185.3		159.9	177	192.9	199.2	189.7	103.65	174.35		139	134.9	142.75	133.45	137.03	89	91.75		90.38	97.25	109.25	113.5	106.67	470	640		555	630	640	630	633.33	445	560		502.5	400	425	445	423.33	87.87	109.54		98.71	92.65
2	7	141.2	29.9	14.9969	291.3	281.8	289.1	287.4	296	275.2	270.7	280.63	174.65	168.05	157.65	166.78	113.3	139.75	113.6	122.22	135.5	136.5	132.5	134.83	130.5	125	136.25	130.58	820	790	810	806.67	830	780	760	790	405	380	350	378.33	320	395	265	326.67	89.32	86.93	85.38	87.21	77.61
2	10	144.3	33.6	16.1364	185.6	210.4	204.4	200.13	238.1	211.7	233.2	227.67	123.75	147.75	123.9	131.8	225.6	219.35	184	209.65	104.75	102.75	107.25	104.92	103.5	98	98.75	100.08	590	650	630	623.33	700	640	670	670	365	370	330	355	620	610	495	575	88.02	90.51	86.79	88.44	107.75
2	10	147.5	39.6	18.2017	139.2	136.6	139.1	138.3	144.2	149.9	135.3	143.13	115.65	132.45	113.8	120.63	115.35	120.2	118.6	118.05	101.5	104	110.5	105.33	110.75	107.25	102.25	106.75	590	580	600	590	580	630	560	590	440	475	365	426.67	370	415	395	393.33	89.84	82.7	75.75	82.76	82.95
2	10	143.4	46	22.3697	99.8	97.4	93	96.73	100.6	94.7	90.5	95.27	63.15	78.2	67.05	69.47	67	78.4	69.65	71.68	88.75	89.75	88.5	89	87.25	89.5	88.75	88.5	660	610	580	616.67	670	600	580	616.67	135	325	200	220	140	235	225	200	52.11	67.62	58.86	59.53	56.22
2	8					162.7	152.7	157.7	155.2	139.2	170.8	155.07	0.45	114.4	93.15	69.33	130.3	113.4	117.3	120.33	5.75	106	118	76.58	109	114	122	115	40	610	570	406.67	590	530	610	576.67	15	340	385	246.67	475	375	535	461.67	10.43	74.32	76.42	53.72	86.48
2	9	143	30.8	15.0619	424.5	361	372.9	386.13	392.4	394.4	353.3	380.03	159.15	143.85	138.5	147.17	221.35	219.5	146.8	195.88	182.75	172.5	180	178.42	176.5	161	176.25	171.25	820	700	720	746.67	780	770	670	740	295	340	265	300	585	500	305	463.33	84.88	88.28	92.38	88.51	92.75
2	8				304.7	272.9	264.7	280.77	272.9	257.5	277.3	269.23	172.2	169.75	151.45	164.47	149.45	156.05	166.2	157.23	109	98.5	112	106.5	118	108.75	115.75	114.17	800	760	730	763.33	740	720	720	726.67	330	355	315	333.33	310	360	365	345	97.57	106.22	94.14	99.31	94.71
2	8	133.2	28.7	16.1761	173.5	157	134.5	155	178.2	158.1	142.5	159.6	130.3	183.2	142.6	152.03	110.85	151.3	157.75	139.97	95.75	93.25	100.75	96.58	94	102.75	101.5	99.42	680	620	520	606.67	710	610	530	616.67	305	500	455	420	260	480	505	415	77.48	99.53	87.47	88.16	76.89
2	9				145.8	154.8	165.7	155.43	152.3	142.4	172.6	155.77	239.75	143.05	144.7	175.83	167.8	133.75	132.2	144.58	93.5	97.75	100.5	97.25	100.75	100	102.75	101.17	660	700	740	700	670	670	740	693.33	740	395	415	516.67	465	370	415	416.67	75.67	74.07	79.71	76.48	76.15
2	9	138.5	27.5	14.3362	169.5	140	159.8	156.43	149.3	137.8	142.8	143.3	147.25	106.85	110.75	121.62	133.45	117.35	102.1	117.63	126.25	133	122.5	127.25	110.5	118.5	117.5	115.5	560	420	480	486.67	480	440	460	460	935	910	945	930	940	785	610	778.33	103.63	98.02	112.12	104.59	118.17
2	11	138.5	32.4	16.8906	330.8	334.5	345.2	336.83	338.3	347		342.65	197.15	199.45	187.05	194.55	164	172.45		168.23	129.5	147.5	147.25	141.42	150.5	146.25		148.38	720	720	780	740	730	760		745	465	585	460	503.33	405	360		382.5	95.45	95.88	89.32	93.55	92.13
2	9	136.5	32.6	17.4965	128.3	125	124	125.77	117.4	130.7	121	123.03	114.8	89.3	90.65	98.25	89.75	106.35	85.8	93.97	98.75	93.5	94.5	95.58	88.25	101.5	95	94.92	690	640	640	656.67	640	670	630	646.67	335	365	335	345	245	415	395	351.67	75.08	74.76	77.29	75.71	69.6
2	10	131.8	26.2	15.0824	146.8	183.7	210.4	180.3	147.4	181	200	176.13	111.65	144.7	123.5	126.62	149.95	146.65	146.9	147.83	88.5	85	93.5	89	93.25	81	89.75	88	690	870	960	840	670	900	970	846.67	250	255	250	251.67	575	235	290	366.67	70.31	70.51	64.95	68.59	92.39
2	9				145.5	153.1	158.8	152.47	151.5	158.7	154.7	154.97	93.1	106.25	96.75	98.7	106	92.7	90	96.23	109	106.25	115	110.08	108	109.75	107.25	108.33	630	690	690	670	650	670	670	663.33	285	255	325	288.33	290	325	235	283.33	66.49	68.94	69.57	68.33	70.54
2	8				103.8	125.2	114.7	114.57	125.3	108.3	125	119.53	88.15	102.25	97.2	95.87	109.35	112.45	104.65	108.82	95.5	96.25	91.5	94.42	92.75	96	96.75	95.17	510	590	570	556.67	560	530	590	560	345	380	315	346.67	430	360	350	380	75.39	80.55	77.14	77.69	89.65
2	9	142.5	34.2	16.8421	171.4	174.3	161.5	169.07	166	184	165.1	171.7	121.1	128.15	86.05	111.77	121.55	145.35	106.25	124.38	103.5	110	109	107.5	117.5	108.75	113.25	113.17	600	640	570	603.33	620	660	600	626.67	350	415	240	335	370	360	405	378.33	81.5	80.11	69.17	76.93	85.09
2	9	133.4	26	14.6104	138.5	142.4	162.6	147.83	137.6	143.6	166.8	149.33	110.35	106.9	142.2	119.82	103.35	124.65	96.35	108.12	104	96	93.5	97.83	94	88.25	102	94.75	640	650	780	690	650	660	800	703.33	470	495	365	443.33	295	405	195	298.33	68.57	71.45	62.35	67.46	78.74
2	6	123	21.8	14.4094	173.9	164.1	152.4	163.47	165.2	151.9	157.4	158.17	104.5	118.6	103.1	108.73	103.25	131.65	104	112.97	116.25	111.75	111.25	113.08	117	105	116.75	112.92	600	540	530	556.67	590	560	570	573.33	365	525	460	450	525	585	460	523.33	83.74	97.06	90.53	90.44	94.85
2	14	165.9	62.3	22.6358	174	131.3	153.4	152.9	119.1	156.9	159.6	145.2	157.85	139.25	128.5	141.87	111.95	120.65	123.85	118.82	104	107.75	107.5	106.42	111	105.75	117.25	111.33	620	470	510	533.33	450	590	530	523.33	430	665	580	558.33	535	310	595	480	90.52	103.54	99.31	97.79	92.13
2	12	151.9	35.9	15.5589	106.9	113	106.7	108.87	100.5	99.5	123.8	107.93	124.45	141.9	143.5	136.62	81.35	92.7	100.65	91.57	111	100	96.75	102.58	94.25	102	105	100.42	500	540	560	533.33	530	510	620	553.33	445	590	510	515	290	470	385	381.67	68.67	86.11	81.27	78.68	67.61
2	14	173.6	54.4	18.0509	135.9	146.8		141.35	148.2	154.4	153.6	152.07	73.45	91.65		82.55	108.5	84.8	74.25	89.18	109.5	104.5		107	112.25	121	121.75	118.33	570	590		580	600	610	610	606.67	280	360		320	520	290	265	358.33	68.57	83.46		76.02	79.8
2	8	128.5	25.1	15.2008	88.3	50.3	96.6	78.4	91.6	62.6	93.3	82.5	110.5	58.25	83.05	83.93	75.45	66.45	78.45	73.45	80	87.5	85	84.17	90.25	87.75	87.75	88.58	520	290	590	466.67	520	410	570	500	500	800	290	530	450	400	275	375	75.53	89.34	64.99	76.62	71.05
2	7	122.7	24.1	16.0077	157.9	179.1	172.9	169.97	168.6	173.4	168.6	170.2	85.75	100.4	102.35	96.17	94.6	102.2	82.5	93.1	108.5	113.75	106.75	109.67	111.5	111.5	102.25	108.42	590	690	650	643.33	620	660	640	640	295	335	260	296.67	270	245	190	235	71.58	70.4	70.68	70.89	75.94
2	8	129.1	26.9	16.1399	270.7	283.1	289.3	281.03	279.9	271.7	301.8	284.47	139.4	135.25	155.35	143.33	159.9	162.75	153.05	158.57	131.75	122.5	124.75	126.33	131	131.25	131.25	131.17	590	640	670	633.33	620	620	650	630	430	390	495	438.33	540	535	490	521.67	103.12	98.66	97.52	99.77	100.03
2	12	162.6	48.9	18.4956	136.4	169.1	181.2	162.23	149.6	137.7	170	152.43	67.35	87.8	107.45	87.53	75.1	71.9	76.7	74.57	120	119.5	101.5	113.67	115.75	113.25	115	114.67	580	740	770	696.67	660	570	750	660	180	195	205	193.33	205	250	160	205	64.8	57.86	64.51	62.39	65.11
2	10	140.8	26.3	13.2663	601.4	595.2	611.8	602.8	578	556.1	548.4	560.83	174.35	187.3	147.85	169.83	194.8	199.45	148	180.75	179.5	186	183	182.83	183.5	185	191.25	186.58	860	870	730	820	840	830	760	810	280	340	305	308.33	370	320	315	335	102.52	103.17	111.91	105.87	110.21
2	10	144.2	35	16.8321	115.6	111	107.6	111.4	129	113.5	116.5	119.67	85.3	83.1	105.75	91.38	88.3	95.65	91.9	91.95	88	86.75	83.5	86.08	94.75	97.5	97	96.42	520	520	520	520	590	520	530	546.67	445	325	355	375	260	380	505	381.67	79.39	75.03	74.03	76.15	71.57
2	10	143.5	35.4	17.1909	296.1	276.1	265.4	279.2	305.6	289.5	290.8	295.3	155.55	141.75	128.55	141.95	156.9	135.55	150	147.48	113.25	112.25	112.25	112.58	116.25	117.75	106.25	113.42	870	880	810	853.33	930	870	830	876.67	275	240	245	253.33	255	245	295	265	90.06	85.21	83.43	86.23	88.03
2	8	130	26.1	15.4438	283.1	265	276.3	274.8	290.2	276.1		283.15	161.75	160.25	159.35	160.45	146.55	131.8		139.18	140.25	136.5	140.75	139.17	135.5	136.25		135.88	680	640	670	663.33	670	650		660	435	420	420	425	370	325		347.5	87.03	87.99	85.22	86.75	99.67
2	14	166	59.7	21.665	163	178.4	176	172.47	181.7	175.3	187.1	181.37	108.65	115.7	99.55	107.97	126.8	144.4	141.25	137.48	93.25	103	103.75	100	96.5	106.25	97.25	100	540	540	580	553.33	540	550	560	550	420	455	280	385	485	585	520	530	92.99	91.44	78.34	87.59	100.91
2	8	128.1	25.6	15.6006	88.2	82.8	91.3	87.43	92.5	90.8	94.4	92.57	74.75	83.15	81.65	79.85	68.1	71.85	66.85	68.93	96.75	92.75	89.75	93.08	104.75	101.75	103.5	103.33	480	460	490	476.67	480	480	490	483.33	285	380	335	333.33	355	360	275	330	72.57	74.74	76.1	74.47	69.93
2	8	129.2	26.3	15.7554	134.2	139.9	138.2	137.43	124.7	139.4	141.2	135.1	160.55	154.05	154.4	156.33	124.3	146.45	197.4	156.05	87	92.5	90.5	90	81.5	92.25	83.5	85.75	690	730	740	720	650	680	710	680	400	365	375	380	390	415	445	416.67	81.08	73.61	71.81	75.5	76.41
2	10	145.1	52.2	24.7934	233.6	244.4	238.3	238.77	253.6	254.1	277.8	261.83	203.65	236.45	262.45	234.18	218.15	242.3	194.8	218.42	122	117.5	107.75	115.75	114.75	108.5	129	117.42	600	590	610	600	600	610	650	620	580	690	740	670	835	715	710	753.33	100.38	119.13	106.91	108.81	125.22
2	8	132	30.8	17.6768	87.7	85.7	92.2	88.53	86.9	103.2	92.7	94.27	84.25	75.25	85.9	81.8	125.15	93.1	98	105.42	76	78	76.75	76.92	65	73	71.25	69.75	590	570	640	600	590	660	610	620	210	205	250	221.67	510	330	290	376.67	65.46	63.64	66.76	65.29	81.35
2	14	183.9	97.4	28.8002	116.8	113.8	116.3	115.63	119.8	111.5	116.8	116.03	134.3	134.8	132.95	134.02	148.45	109.3	161.1	139.62	85.5	87.5	89	87.33	88.75	89.25	84.25	87.42	520	510	500	510	530	490	540	520	680	895	835	803.33	730	665	775	723.33	87.47	88.83	93.83	90.04	86.03
2	12	147	30.9	14.2996	257.1	243.9	262.4	254.47	257.2	254.3	273.9	261.8	211.2	192.55	195.3	199.68	160.25	156.45	149.65	155.45	122.5	122	127.5	124	131.5	129.25	130	130.25	630	640	670	646.67	650	630	680	653.33	640	565	600	601.67	545	435	395	458.33	106.86	96.35	104.72	102.64	96.47
2	8	131.9	25.7	14.7721	344.4	310.5	316.3	323.73	351.6	332.3	337.2	340.37	175.15	120.85	168.5	154.83	154.05	131.8	148.05	144.63	154.75	159.5	153.75	156	151.5	156	154.75	154.08	770	680	730	726.67	770	750	720	746.67	325	290	400	338.33	325	240	295	286.67	94.87	89.84	92.13	92.28	94.47
2	14	172.2	49.6	16.7269	153.8	148.5	162	154.77	140.2	147.1	152.5	146.6	113.85	112.65	124.75	117.08	119.8	111.3	109.25	113.45	100	97	101.5	99.5	99.5	104.75	105.75	103.33	620	630	640	630	620	630	630	626.67	365	280	325	323.33	345	295	305	315	84.5	79.39	84.63	82.84	76.92
2	7	132	30.2	17.3324	236.2	232.5	223.5	230.73	235.9	231	214.8	227.23	150.1	181.3	130.25	153.88	129.7	127	122.55	126.42	137	140.75	137.75	138.5	132.5	134.5	139.5	135.5	670	660	620	650	670	660	620	650	420	440	430	430	290	305	325	306.67	76.18	74.2	85.07	80.63	77.84
2	12	165.5	60.7	22.1612	151.4	144.3	148.9	148.2	159	158.9	157.2	158.37	94.05	97.35	104.85	98.75	119.15	142.8	139.8	133.92	114.75	106	105.75	108.83	107.5	96.75	98.5	100.92	580	580	610	590	620	600	600	606.67	300	390	410	366.67	405	435	490	443.33	78.56	85.65	88.22	84.14	85.03
2	7	128	25.8	15.7471	235.1	220.7	226.4	227.4	252.8	255.8	225.6	244.73	150.7	203.75	113.2	155.88	135.8	180.95	114.2	143.65	127.25	124.75	127.25	126.42	126.5	133.75	125	128.42	630	860	610	700	670	730	620	673.33	440	445	355	413.33	330	390	290	336.67	106.68	115.54	91.62	104.61	98.76
2	12	158.3	40	15.9624	252.1	218.1	236.2	235.47	252	234.1	228	238.03	171.05	158.9	151.85	160.6	180.2	163.6	151.05	164.95	98.25	88.5	88.75	91.83	95	100.5	102.25	99.25	710	620	660	663.33	710	670	640	673.33	375	480	415	423.33	345	435	380	386.67	95.27	106.37	109.1	103.58	101.39
2	8				78.8	85.2	90.5	84.83	78.1	77.8	78.6	78.17	69.75	63.9	78.25	70.63	60.5	61.35	69.9	63.92	87.75	92.25	95.5	91.83	77.5	74.5	80.5	77.5	490	500	510	500	470	490	500	486.67	340	265	315	306.67	220	205	225	216.67	66.24	61.64	66.02	64.63	62.63
2	12	180.5	64.5	19.7973	190.8	139.7	159.8	163.43	181.6	157	161.1	166.57	109.8	82.8	92.95	95.18	99.8	98.95	103.3	100.68	113.25	118.25	105	112.17	103.75	107.5	105.75	105.67	810	590	680	693.33	820	620	690	710	255	275	230	253.33	220	275	240	245	68.21	67.6	72.1	69.3	65.23
2	7	127	24.6	15.252	178.6	187.7	161.6	175.97	178.9	189.6	179.7	182.73	184.1	106.55	94	128.22	109.9	99.05	88.05	99	99.5	107.75	110.5	105.92	105.5	117	120.25	114.25	540	560	490	530	540	580	530	550	660	445	290	465	445	350	255	350	107.91	99.33	88.4	98.55	101.15
2	7	122.5	25.7	17.1262	272.9	268.6	252.1	264.53	290	248.9	255.9	264.93	182	199.75	156.25	179.33	190.3	175.25	213.05	192.87	115.25	122.25	123	120.17	122.75	123	132	125.92	670	660	630	653.33	710	650	650	670	485	575	470	510	440	565	565	523.33	113.61	111.38	109.11	111.37	110.19
1	6	122.4	22.9	15.2853	108.6	120.1	105	111.23	171.6	133.9	106.5	137.33	237.2	129.15	111.25	159.2		130.95	141.1	136.03	77.5	78.25	71.75	75.83	69.5	79.25	73	73.92	660	540		600	930	670	530	710	390	370	575	445	430	485	570	495	79.27	73.61	92.49	81.79	81.35
1	9				115.6	119.2	112.4	115.73	124	129.4	127.5	126.97	115.8	121.2	121.3	119.43	122.15	110.45	116.25	116.28	87.75	88	91.75	89.17	95.25	96	97.5	96.25	540	510	520	523.33	560	570	560	563.33	400	480	435	438.33	325	415	430	390	89.27	83.95	78.23	83.82	80.13
1	9	142.7	39.1	19.2012	326.1	283.2	264.8	291.37	320.2	282.8	277.3	293.43	150.3	140.85	130.9	140.68	178.25	151.95	150.45	160.22	130	130.5	134.5	131.67	127.75	128.25	128.75	128.25	760	670	610	680	740	660	630	676.67	295	350	320	321.67	485	410	460	451.67	105.42	105.5	105.02	105.31	97.23
1	8				149.2	150.6	152.1	150.63	154.9	152.3	147.2	151.47	156.35	134.85	161.45	150.88	121.1	133.25	146.95	133.77	101.75	98.75	105.5	102	91.25	104	104.75	100	600	580	580	586.67	620	610	580	603.33	495	325	645	488.33	375	480	550	468.33	90.49	90.43	108.83	96.58	94.9
1	7	134	32	17.8213	302.4	285.9	319.7	302.67	314.2	301.4		307.8	134	156.7	132.35	141.02	164.55	128.55		146.55	139.5	138.5	140.25	139.42	135.75	144		139.88	750	700	750	733.33	770	720		745	340	395	350	361.67	355	315		335	81.38	92.01	88.79	85.09	83.6
1	10				240.7	261.6	222.1	241.47	238.1	246.7		242.4	128.6	122.7	135.4	128.9	115.4	108.55		111.98	129.5	129.25	130.5	129.75	127.5	124.75		126.13	690	730	650	690	670	720		695	405	295	365	355	410	250		330	93.52	84.7	81.35	87.44	91.05
1	7	130.6	24.5	14.3641	328.1	274.6	287	296.57	287	316.9	273.2	292.37	200.1	179.1	235.9	205.03	174.95	210.8	149.65	178.47	138.75	126	131.5	132.08	130.5	132.75	136	133.08	920	840	820	860	860	860	780	833.33	560	360	550	490	345	575	405	441.67	89.01	77.37	89.99	85.46	67.32
1	12	151.5	53	23.0914	178.5	191.3	194.7	188.17	186.8	195.1	189.9	190.6	143.55	160.4	144.2	149.38	138.45	140.55	135.1	138.03	101.5	104.5	101.25	102.42	107.5	102	101	103.5	540	560	600	566.67	550	570	550	556.67	465	450	400	438.33	510	385	390	428.33	97.93	102.36	101.05	100.45	101.57
1	6	132	30.7	17.6194	152.9	166.1	156.5	158.5	149.1	167.1		158.1	160.25	147.65	114.55	140.82	159.8	158.7		159.25	102.25	99	106	102.42	82	93.75		87.88	530	570	540	546.67	500	580		540	620	600	360	526.67	830	505		667.5	93.64	89.89	77.08	86.87	119.3
1	11	143	31.5	15.4042	167.2	196.2	188.8	184.07	188.4	196.1	209.2	197.9	116.1	200.7	187.7	168.17	160.8	165	133.85	153.22	98.5	103.75	110	104.08	91.75	100.25	106	99.33	720	800	800	773.33	760	800	820	793.33	250	575	455	426.67	440	365	285	363.33	70.37	79.02	71.95	73.78	75.08
1	13	158	58.4	23.3937	274.7	252	275.7	267.47	285.1	285.7	284.5	285.1	140.35	130.8	159.45	143.53	250.25	159.25	218.75	209.42	135.25	130.25	135	133.5	116.75	127	110.25	118	580	540	570	563.33	600	590	590	593.33	490	480	500	490	705	365	665	578.33	112.22	111.85	115.2	113.09	119.16
1	7	124.9	21.7	13.9102	83.9	88.9	82.3	85.03	86.9	95.9	89.8	90.87	67.3	69.95	64.75	67.33	75.1	80.4	76	77.17	96.5	92.25	101.75	96.83	84.75	86.25	96.75	89.25	490	510	470	490	510	590	510	536.67	430	250	395	358.33	270	195	305	256.67	66.99	66.48	61.41	64.96	70.03
1	13				205.2	186.5	200.1	197.27	199.3	168.8	176.4	181.5	130	153.8	173.05	152.28	98.95	107.35	129.85	112.05	104	103.5	105.25	104.25	107	110.5	111.75	109.75	760	670	690	706.67	760	610	670	680	280	400	470	383.33	205	350	360	305	76.66	89.94	99.23	88.61	70.28
1	7	127.6	23.1	14.1877	401.7	398.1	381	393.6	386.1	383.7	400.6	390.13	180.95	168.1	160	169.68	156.35	190.45	189	178.6	177.25	173.5	171	173.92	169	176	174.75	173.25	640	630	620	630	630	640	640	636.67	530	595	505	543.33	395	580	530	501.67	118.15	123.39	109.77	117.1	123.29
1	9				112.7	106.4	73.7	97.6	94.1	82.2	74.1	83.47	138.65	121.65	75.4	111.9	89.35	77.8	89.35	85.5	75.75	66.25	77.25	73.08	75	70.25	82.25	75.83	880	810	570	753.33	750	720	590	686.67	335	225	250	270	215	205	280	233.33	60.53	55.42	57.44	57.8	55.02
1	9				236.8	237.8	230.9	235.17	232.8	228.5	223.5	228.27	131.15	109.9	111.95	117.67	108	104.5	195.65	136.05	121.75	126.5	125.75	124.67	113.75	114.75	112	113.5	760	740	720	740	750	710	720	726.67	315	126.5	125.75	189.08	270	210	460	313.33	74.19	70.89	78.52	74.53	71.47
1	6	125.7	22.2	14.0502	195.9	182.1	187.1	188.37	187.8	182.3	168	179.37	122.15	109.85	119.55	117.18	146.15	147.8	118.85	137.6	121	120.25	131	124.08	114.5	124.5	120.25	119.75	680	640	650	656.67	650	610	590	616.67	310	310	320	313.33	335	525	350	403.33	81.34	78.54	73.94	77.64	74.33
1	6	131.7	38.1	21.9661	167.5	158.1	159.9	161.83	159.2	146.9	145	150.37	170.4	140.9	137.35	149.55	127.15	133.2	136.6	132.32	98.5	103.75	102.5	101.58	106.75	106.5	100	104.42	640	560	570	590	610	550	580	580	455	610	610	558.33	525	645	475	548.33	80.88	89.98	90.05	86.97	74.98
1	10	154.2	40.9	17.201	109.8	109.2	103.5	107.5	134	118.5	109.7	120.73	117.3	109.2	108.5	111.67	107.35	104.85	99.75	103.98	68.25	69.75	67	68.33	74.5	69	73.25	72.25	700	660	650	670	810	790	680	760	300	300	310	303.33	215	230	285	243.33	68.86	71.83	72.01	70.9	61.73
1	11	138	38.9	20.4264	238.5	240.2	236	238.23	234	221.4	223.1	226.17	144.05	139.9	177.5	153.82	159.85	152.95	147.8	153.53	148.5	153.5	151.25	151.08	138.5	139	142	139.83	680	690	670	680	670	660	670	666.67	400	365	475	413.33	530	470	480	493.33	75.16	74.63	77.26	75.6833	81.28
1	8				120.5	117.2	116.3	118	119.7	113.3	120.4	117.8	67.3	70.8	69.65	69.25	76.7	71.45	75.5	74.55	111.25	107	104	107.42	108	107	109	108	540	530	530	533.33	550	520	550	540	200	220	225	215	215	225	240	226.67	65.07	68.77	74.82	69.55	69.9
1	7				209	184.1	195.3	196.13	182.4	177.7	190.3	183.47	190.5	256.05	268.8	238.45	283.65	289.9	281.4	284.98	103	85.25	94.5	94.25	80.25	84.25	92.25	85.58	690	640	670	666.67	650	620	610	626.67	635	865	815	771.67	855	955	1000	936.67	91.52	103.8	115.67	103.66	103.69
1	9	147.2	37.9	17.4914	119.9	111.3	111.5	114.23	114.1	117.9	109	113.67	94.8	88.25	86.7	89.92	111.95	104.45	84.25	100.22	86.5	87	84.75	86.08	81.5	86	82.5	83.33	600	570	570	580	610	630	580	606.67	270	280	270	273.33	310	325	255	296.67	72.59	69.93	70.06	70.86	74.13
1	13	166.9	59.4	21.3243	237.4	227.9	243.2	236.17	224.8	226.7	232.1	227.87	123.45	114.7	118.3	118.82	111.9	122.5	121.75	118.72	134	138.75	130.25	134.33	130.5	125.5	120.25	125.42	620	600	640	620	600	610	630	613.33	400	360	315	358.33	455	375	380	403.33	91.5	83.71	89.67	88.29	96.15
1	9	144.2	35.7	17.1687	228.6	221.8	227.1	225.83	232.9	229.3	237.3	233.17	113.1	123.55	120.25	118.97	118.25	131.45	112.2	120.63	125	121.75	119.75	122.17	117	125.75	125.75	122.83	620	610	620	616.67	630	600	610	613.33	405	355	355	371.67	350	385	445	393.33	96.84	97.14	91.47	95.15	100.73
1	7	133.5	26.9	15.0935	109	103.6	113.4	108.67	104.7	112.4		108.55	184.35	124.25	145.8	151.47	101.65	125.1		113.38	94.25	99.25	91.5	95	99.25	104		101.63	540	520	540	533.33	540	550		545	645	555	465	555	480	685		582.5	82.24	86.03	70.33	79.53	76.54
1	10	145.2	41.5	19.6841	264.7	208.3	198.5	223.83	252.3	206.8	197.8	218.97	238.2	141.7	193.6	191.17	191.05	193.5	139.65	174.73	106.25	105.5	108.25	106.67	111	110	113.25	111.42	790	600	580	656.67	770	610	580	653.33	935	475	930	780	355	685	410	483.33	87.42	94.99	100.43	94.28	84.66
1	8	134.7	30	16.5343	174.2	158.6	171.8	168.2	160.4	165.6	158.6	161.53	150.15	217.8	130.6	166.18	144.45	105.05	107.35	118.95	115.75	103.25	116.75	111.92	119.75	115	114.5	116.42	610	610	580	600	560	580	550	563.33	390	695	405	496.67	460	340	375	391.67	71.77	72.62	79.83	74.74	84.31
1	6	129.5	33.9	20.2144	138.5	138.4	141.8	139.57	153.1	129.8	138.7	140.53	172.25	139.7	160.3	157.42	190.9	141.75	217.7	183.45	72.25	80	81.25	77.83	74.5	79	78.75	77.42	660	600	630	630	650	580	610	613.33	400	500	485	461.67	480	455	640	525	83.29	93.53	94.37	90.4	96.11
1	9	133	27.1	15.3203	75.7	73.9	69.3	72.97	72	71.5	64	69.17	98.45	84.1	96.8	93.12	100.75	85.2	76.15	87.37	69.25	71.25	62.5	67.67	63	68	62.75	64.58	510	490	480	493.33	520	490	480	496.67	505	375	420	433.33	385	415	330	376.67	73.38	77.68	79	76.69	74.76
1	7	132	30.5	17.5046	191.4	187.5	181.7	186.87	195.1	182.1	182.5	186.57	182.7	215.8	178.95	192.48	177.4	219.75	168.95	188.7	101.75	104.75	104.5	103.67	116.25	114.5	114.75	115.17	590	580	570	580	630	540	540	570	560	725	630	638.33	940	925	665	843.33	103.44	97.68	91.34	97.49	78.86
1	11				151.3	121.4	159.9	144.2	168.7	126.1	157	150.6	130.25	112.85	118.8	120.63	123.6	114.4	93.75	110.58	108.25	108.25	110	108.83	115	112.25	111.5	112.92	510	430	530	490	540	420	550	503.33	460	605	350	471.67	445	505	265	405	92.11	90.57	74.39	85.69	97.43
1	10	146.5	32.9	15.3292	275.3	245.8	247.3	256.13	284	258.6	251.4	264.67	136.75	163	115	138.25	136.5	127.95	173.1	145.85	135.75	116.75	136.75	129.75	146.75	147	130.75	141.5	690	630	620	646.67	690	630	610	643.33	330	505	315	383.33	275	365	490	376.67	91.66	95.52	87.79	91.66	91.81
1	8	131.6	28.5	16.4563	274.2	261.4	254.4	263.33	255.3	247.2	246.3	249.6	177.05	142.3	177	165.45	155.9	124.75	118	132.88	129.5	135	134	132.83	129.25	130.5	135.25	131.67	680	670	670	673.33	640	660	660	653.33	435	365	535	445	700	330	265	431.67	96	84.19	86.88	89.02	108.51
1	7	120.5	21.1	14.5314	262.2	281.4	235.9	259.83	195.5	258.1	270.7	241.43	171.75	142.95	204.65	173.12	132.15	147.1	149.1	142.78	85.25	80.5	84	83.25	90.25	78.75	85	84.67	1130	1250	1010	1130	840	1200	1190	1076.67	300	175	360	278.33	220	195	185	200	74.12	71.04	80.37	75.18	75.07
1	8	128.5	33.2	20.1063	128.8	129	116.5	124.77	125.3	120.3	130	125.2	97	104.2	98.3	99.83	143.8	132.15	107.1	127.68	90	86.75	85.75	87.5	85	80	91.75	85.58	710	700	690	700	710	700	720	710	300	285	270	285	325	250	300	291.67	60.35	65.63	61.43	62.47	66.19
1	7	129.3	29.8	17.8246	177.7	182.4	162.8	174.3	174.6	166.8	161	167.47	123.75	139.3	108.35	123.8	124.45	124.2	132	126.88	91	93.5	98.5	94.33	96.5	98.25	96.5	97.08	660	650	600	636.67	650	600	580	610	350	380	310	346.67	310	440	360	370	86.01	96.03	80.84	87.63	87.74
1	12	149.9	46.4	20.6497	254.8	256.8	271.6	261.07	275	283.6	315.3	291.3	136.4	158.45	152.05	148.97	161.05	150.65	151.5	154.4	120.25	114	118.25	117.5	122.25	125.5	120.75	122.83	640	670	720	676.67	680	720		700	375	360	340	358.33	380	350	295	341.67	92.3	92.77	86.28	90.45	98.29
1	10	144.5	33.8	16.1875	330.6	315.7	295.2	313.83	339.9	336.7	332.6	336.4	176.6	209.05	281.45	222.37	248.6	225.85	172.2	215.55	138.75	126	125.75	130.17	134.5	138	142	138.17	740	730	700	723.33	770	750	720	746.67	465	510	745	573.33	600	555	380	511.67	100.26	97.4	96.03	97.9	96.04
1	7	127.7	30.2	18.5193	178.2	171.1	158.3	169.2	169.5	168.6	158.4	165.5	152.55	194.65	191.25	179.48	153.75	155.15	144.8	151.23	102.5	110.25	108.75	107.17	112.75	113.5	112.5	112.92	620	660	580	620	630	620	580	610	655	565	850	690	820	775	635	743.33	90.96	82.55	95.46	89.66	90.06
1	12	162.4	67.3	25.5178	228.5	245.2	258.8	244.17	240.9	254.5	260.2	251.87	157.2	161.45	211.25	176.63	168.5	202.95	152.4	174.62	132.75	129	135.25	132.33	129.25	134.75	131	131.67	650	690	700	680	670	670	720	686.67	395	365	490	416.67	410	495	345	416.67	90.74	95.38	106.81	97.64	99.95
1	11	157.7	38.9	15.6418	249	233.5	216.8	233.1	239.6	220.2	214.5	224.77	122.2	149.25	139.55	137	187.1	155.15	214.35	185.53	93.75	105.75	100.5	100	88.5	95.5	102.5	95.5	880	780	710	790	890	700	730	773.33	310	305	325	313.33	325	385	535	415	70.61	76.88	83.43	76.97	77.44
1	15	161.6	72.7	27.8389	215.3	231.8	245.9	231	221.4	241.9	237	233.43	114.2	167.3	137.3	139.6	182.95	126.75	123.6	144.43	138.75	138.25	145	140.67	142	147.5	150.5	146.67	530	580	590	566.67	560	610	590	586.67	600	680	780	686.67	740	530	515	595	118.43	102.27	107.12	109.27	120.1
1	10				108.1	100.3	120.5	109.63	112.4	114.9	114.3	113.87	98.1	109.65	127.8	111.85	106.85	102.2	111.6	106.88	73.75	70.25	71	71.67	80	80	77	79	530	500	610	546.67	540	550	590	560	365	440	385	396.67	340	485	340	388.33	92.22	101	80.49	91.24	94.47
1	6	130.1	37.6	22.2143	182.4	184.2	207.8	191.47	182.3	198.3	191.2	190.6	108.5	136.6	108.4	117.83	121.05	127.8	100.7	116.52	135.75	132.5	138.25	135.5	133.25	140.5	136	136.58	510	510	540	520	500	510	520	510	590	410	450	483.33	525	490	365	460	109.84	97.92	100.89	102.88	105.67
1	13	150.3	38.4	16.9986	133.3	146	123.8	134.37	125.7	126.1	113.3	121.7	118.2	130.45	107.3	118.65	133.25	199.3	138.1	156.88	86	88.75	90.25	88.33	83.5	71.5	79.25	78.08	640	700	610	650	650	640	580	623.33	530	620	455	535	385	455	440	426.67	85.73	90.11	79.49	85.11	84.06
1	7	129.4	22.7	13.5568	102.8	110.6	99.9	104.43	113	101.3	107.6	107.3	84	97.6	96	92.53	90.3	91.85	100.7	94.28	89.5	91	93	91.17	96.25	93	90.5	93.25	500	520	480	500	540	480	510	510	325	410	390	375	340	490	425	418.33	78.42	81.36	81.87	80.55	75.88
1	9	139.2	28.9	14.9149	202.9	211.9	173.8	196.2	222.6	177.1	167.4	189.03	125.25	212.35	110.45	149.35	160	128.8	101.3	130.03	97	98	108.5	101.17	97	103.75	98	99.58	780	820	650	750	850	660	640	716.67	250	645	250	381.67	370	335	315	340	72.91	74.34	69.46	72.2367	71.57
1	11	150.6	41.2	18.1655	384.2	379.4	371	378.2	409	355.8	365.6	376.8	216.3	169.6	141.3	175.73	259.2	239.95	187.85	229	151.5	150.75	155.5	152.58	148.5	148	146.75	147.75	800	720	710	743.33	840	740	740	773.33	460	435	315	403.33	610	680	410	566.67	92.27	100.53	98.71	97.17	96.64
1	6	126.4	21.6	13.5195	92.2	85.7	88	88.63	89.9	87.8	97.8	91.83	73.35	80.6	77.65	77.2	71	68.6	89.05	76.22	87	85.25	92.75	88.33	86.25	86.5	92.25	88.33	530	510	510	516.67	540	520	570	543.33	250	380	365	331.67	195	245	290	243.33	64.76	76.7	68.45	69.97	65.87
1	8	133.4	36.1	20.286	112.6	96.6	96.6	101.93	99.6	99.1	98.5	99.07	77.9	69.5	72.9	73.43	78.1	79.4	78.05	78.52	94	98.25	87.5	93.25	87.5	84.25	81.5	84.42	580	500	500	526.67	510	530	510	516.67	225	205	215	215	280	310	315	301.67	66.82	64.64	67.73	66.4	77.01
1	11	148.7	36.4	16.4619	118.1	107.2	99.9	108.4	111.7	107.9	114.6	111.4	77.5	76.3	63.85	72.55	71.8	74.1	77.25	74.38	101.25	95	104.25	100.17	87	95.5	94	92.17	540	540	460	513.33	550	520	510	526.67	235	240	245	240	200	210	210	206.67	66.19	65.41	63.14	64.91	60.99
1	10	138.4	35.3	18.429	236	220.2	223.6	226.6	231.8	232.9	241.8	235.5	122.35	122.85	108.2	117.8	175.65	138.1	109.05	140.93	124.5	121.25	122.5	122.75	122.25	123.5	122.5	122.75	710	700	700	703.33	730	730	740	733.33	320	325	275	306.67	465	400	230	365	86.77	85.21	81.46	84.48	86.43
1	12	167.1	51.1	18.3007	99.1	98.3	106.3	101.23	103.9	99.9	92.7	98.83	79.4	91.2	93.1	87.9	98.95	97.1	94.2	96.75	98.75	96.25	95	96.67	91.75	93.75	94	93.17	510	510	520	513.33	540	510	500	516.67	360	420	410	396.67	395	590	480	488.33	67.73	78.23	75.93	73.96	78.32
1	10	140.5	31.8	16.1092	122.9	117.6	116.2	118.9	134.7	119.4		127.05	90.6	87.8	87.05	88.48	95.05	84.05		89.55	97.75	89.25	92	93	97	95.75		96.38	560	550	510	540	580	530		555	260	250	275	261.67	375	400		387.5	71.83	78.03	78.41	76.09	82.04
1	7	127.3	24.5	15.1185	129	114	118.8	120.6	132.2	136.7	121.7	130.2	145.4	166.15	118.15	143.23	118.65	140.85	132.65	130.72	83	75.5	81	79.83	92.25	94	82.75	89.67	730	660	680	690	720	760	690	723.33	420	410	415	415	325	320	315	320	65.35	78.15	68.97	70.82	67.97
1	6	127.7	31.9	19.5618	199.8	169.5	182.1	183.8	176.3	175.5	169.1	173.63	117.85	179.05	176.65	157.85	126.6	172.6	123.7	140.97	109.5	92	99.5	100.33	105	102	104	103.67	690	600	630	640	640	610	620	623.33	340	580	530	483.33	440	610	440	496.67	88.53	103.74	94.65	95.64	90.5
1	7	137	27.2	14.492	248.4	311.6	297.1	285.7	289.3	308.9	297.7	298.63	98.25	116.3	113.95	109.5	149.1	122.4	114.35	128.62	136.75	141.75	135.75	138.08	146.5	139.5	141.75	142.58	600	700	640	646.67	640	690	670	666.67	255	230	330	271.67	530	310	280	373.33	92.71	90.22	94.55	92.49	95.8
1	6	119.5	23.9	16.7364	149.7	152.2	144.8	148.9	174.3	173.8	162.9	170.33	111.4	109.15	114.85	111.8	106.4	105.85	105.85	106.03	87.75	98.75	93.5	93.33	113	111.75	107	110.58	620	610	590	606.67	680	650	630	653.33	400	340	335	358.33	265	250	320	278.33	79.13	73.65	81.99	78.26	76.9
1	9	154.4	37.4	15.6883	190.4	170.5	170.7	177.2	217.5	172.9	181.2	190.53	124.1	138.7	130.45	131.08	165.75	136.9	127.95	143.53	114.75	120.75	108.25	114.58	115.75	115	121.25	117.33	890	600	620	703.33	830	630	630	696.67	275	400	405	360	395	460	410	421.67	70.05	82.72	87.62	80.13	66.39
1	9				101	103.2	101.4	101.87	108	104.3	99.6	103.97	71.7	76.2	78.5	75.47	75.65	77	87	79.88	85	85.75	87.25	86	88.5	88.5	88.5	88.5	500	490	480	490	490	490	470	483.33	285	320	340	315	340	245	280	288.33	78.57	82.57	84.36	81.83	81.17
1	8	128.2	21.9	13.325	439.6	431.4	419.9	430.3	421.9	421.1	433.4	425.47	212.35	179.7	163.5	185.18	210	221.65	224.85	218.83	161.25	160.25	162.75	161.42	155.75	158.75	157.25	157.25	730	690	720	713.33	740	710	780	743.33	570	515	420	501.67	805	650	715	723.33	107.32	110.99	104.89	107.73	110.24
1	7	131.5	27.1	15.6718	120.7	116.2	104.8	113.9	116.7	119.2	123.1	119.67	83.4	77.65	73.4	78.15	76.35	72.15	87.85	78.78	103.25	109	100	104.08	99	102	105.25	102.08	580	530	500	536.67	570	550	540	553.33	310	385	270	321.67	225	330	580	378.33	69.53	73.27	68.61	70.47	64.55
1	13	169.2	51.3	17.9191	263.3	274.1	267.9	268.43	277.8	270.9	266.6	271.77	138.4	145.9	176.05	153.45	247.7	129.85	186.5	188.02	152.5	158	161	157.17	134	148.25	146.5	142.92	690	710	690	696.67	730	710	710	716.67	410	415	445	423.33	605	350	595	516.67	85.36	84.27	85.82	85.15	92.67
1	13				113.6	109.2	102.3	108.37	114.1	119.1	115.3	116.17	85.75	79.75	76.3	80.6	91.4	80.6	81.1	84.37	100	99.25	97.25	98.83	97.5	99	98.75	98.42	550	560	540	550	550	570	550	556.67	450	320	275	348.33	570	300	315	395	78.96	71.08	68.48	72.84	92.83
1	10				336.3	329.8	327.2	331.1	338.4	341.1	335	338.17	172.8	145.3	222	180.03	199.05	144	176.25	173.1	140.5	138.25	137.75	138.83	131.75	142.25	143.5	139.17	730	720	710	720	730	720	710	720	375	355	540	423.33	485	385	425	431.67	97.7	96.71	109.29	101.23	108.6
1	11	147	43.9	20.3156	291.8	299.3	306.6	299.23	344.1	308.8	330.5	327.8	149.25	155.75	141.95	148.98	351.9	167.4	185.4	234.9	135.25	139.25	141	138.5	137.5	147	151	145.17	680	670	680	676.67	810	730	730	756.67	365	350	340	351.67	800	355	430	528.33	86.89	88.94	92.17	89.3333	85.54
1	7	131.7	26.3	15.163	98.2	109.2	102.7	103.37	121.1	114.3	112.4	115.93	66.9	70.7	71.65	69.75	96.2	84	83.45	87.88	93.5	90.25	96.25	93.33	96.75	94.75	95.5	95.67	510	590	570	556.67	640	580	560	593.33	250	195	225	223.33	275	285	300	286.67	66.1	65.71	60.27	64.03	64.41
1	8	136	28.4	15.3547	108.5	119.2	114.5	114.07	112.9	121.6	111.4	115.3	89	95.55	94.2	92.92	87.55	88.65	76.15	84.12	92.25	97.75	87	92.33	97.25	102.75	94.25	98.08	510	550	550	536.67	520	590	540	550	430	420	315	388.33	445	285	230	320	79.3	78.44	70.4	76.05	77.49
1	6				130.9	126.6	123.7	127.07	139.1	121.9	136	132.33	82.9	117.25	111.85	104	103.85	79.2	115	99.35	110.75	106.75	104	107.17	106	109.75	110.5	108.75	590	580	550	573.33	650	560	610	606.67	245	340	315	300	315	320	380	338.33	66.83	67.4	75.25	69.83	68.8
1	12				128.2	119.9	128.1	125.4	121.8	133.4	120.7	125.3	128.05	96.25	113.95	112.75	92.95	116.75	111.25	106.98	106.5	106.75	102.25	105.17	99.75	104	99.5	101.08	560	530	560	550	520	550	530	533.33	530	335	515	460	315	400	520	411.67	77.32	67.65	80.97	75.31	77.32
1	10	150.7	36.7	16.1599	128.4	154.2	124.3	135.63	150.4	145.9	128.4	141.57	106.25	108.1	89.4	101.25	120	98.4	93.95	104.12	63	79.75	82.25	75	85.5	82.75	89.75	86	940	950	940	943.33	940	940	750	876.67	190	180	180	183.33	190	160	240	196.67	52.76	52.04	51.14	51.98	50.95
1	9	132.4	28.6	16.3151	266.9	281.6	280	276.17	321.7	283.3	270.5	291.83	305.75	269.05	166.45	247.08	315.8	289.1	153.95	252.95	117.25	124.25	121.25	120.92	140.25	128.25	122.5	130.33	680	720	690	696.67	730	730	690	716.67	1040	845	480	788.33	835	755	395	661.67	103.36	92.08	106.15	100.53	111.23
1	7	133.5	26	14.5885	136.2	124.1	120.5	126.93	141.1	132.3	122.5	131.97	138.65	106.3	126.75	123.9	117.5	137.3	103.45	119.42	97.25	96.25	89.5	94.33	90.25	95.5	93	92.92	700	620	600	640	690	660	620	656.67	380	395	485	420	430	475	345	416.67	68.86	74.7	77.01	73.52	70.73
1	11				169.1	169.9	170.1	169.7	162.8	162.7	168	164.5	114.3	108.85	103.3	108.82	131	105.25	126.35	120.87	117.25	119.75	115	117.33	112.75	110.25	113.5	112.17	650	670	660	660	640	640	640	640	330	270	315	305	525	265	545	445	86.09	74.36	69.24	76.56	77.79
1	10				94.9	93.3	89.2	92.47	100.3	91.6	89.8	93.9	108.95	95.25	82.45	95.55	84.15	107.05	109.75	100.32	102.5	107.75	99	103.08	99	99.5	89.75	96.08	560	530	520	536.67	560	530	520	536.67	340	425	545	436.67	445	325	555	441.67	58.89	63.24	71.5	64.54	72.34
1	11	153.2	36.3	15.4664	153.8	142.9	150.3	149	160.2	151.6	155.3	155.7	115.9	111.8	101.65	109.78	112.65	96.55	108.8	106	104.5	98	105.75	102.75	110.75	103.75	107	107.17	570	540	570	560	580	550	570	566.67	455	385	290	376.67	410	355	370	378.33	96.14	86.66	84.69	89.16	86.66
1	11	160.6	43.5	16.8655	151.4	144.7	161.1	152.4	164.5	160.5	154.4	159.8	109.65	82.85	89.75	94.08	145.9	146.35	120.05	137.43	110.25	104	108.75	107.67	105.75	102	105.5	104.42	590	600	620	603.33	630	610	600	613.33	410	305	315	343.33	565	580	430	525	82.54	81.38	83.47	82.46	83.38
1	10	132	27.5	15.7828	223.6	235	211.3	223.3	225.8	234.2	214.8	224.93	114.9	137.7	167.55	140.05	130.1	134.45	119.1	127.88	122.25	119	116.75	119.33	111.75	105	111.75	109.5	670	730	640	680	680	710	650	680	360	305	370	345	390	380	320	363.33	90.88	85.55	86.86	87.76	91.99
1	10	145.7	49.5	23.3177	157.4	149.9	151.3	152.87	158.3	153.7	146.8	152.93	104.35	102.5	88.85	98.57	98.85	101.25	123.3	107.8	104.5	102.75	109	105.42	115.5	108	113.25	112.25	590	540	570	566.67	590	570	560	573.33	405	460	325	396.67	400	475	415	430	95.38	94.81	84.05	91.41	86.58
1	12	167.7	45.3	16.1076	75	82	78	78.33	80	80.4	93.3	84.57	69.95	64.8	60.7	65.15	77.6	60.2	61.7	66.5	84.25	83.25	82.25	83.25	84	84.25	92.5	86.92	450	510	520	493.33	500	520	550	523.33	275	285	250	270	275	230	190	231.67	72.49	66.53	58.62	65.88	67.69
1	10	147	32.8	15.1789	319.8	323.7	323.1	322.2	325.9	371.2	340.9	346	180.55	177.35	186.9	181.6	175.2	188.7	181.35	181.75	166.25	160	157.5	161.25	162.75	162.75	167.75	164.42	660	650	650	653.33	630	740	700	690	490	385	465	446.67	530	420	430	460	91.53	86.84	89.03	89.13	96.41
1	10				114.6	155.5	154.2	141.43	130.1	125.4	139.6	131.7	119.05	140.25	149.5	136.27	109.65	130.6	131.55	123.93	104.25	106.75	110.75	107.25	111.75	113.25	114.5	113.17	490	630	620	580	540	520	600	553.33	540	625	570	578.33	465	680	485	543.33	81.26	82.34	78.53	80.71	83.78
1	13				90.7	93.9	95	93.2	94.9	89.9	87.5	90.77	110.45	116.5	106.65	111.2	98.4	97.95	102.1	99.48	97	101.25	100	99.42	107.75	102.25	103	104.33	500	520	510	510	520	520	490	510	370	395	355	373.33	335	315	355	335	73.03	68.09	75.17	72.1	65.3
1	11	163	65.7	24.7281	169.5	185.5	178.2	177.73	183.2	196.7	179.6	186.5	153.9	118.5	122.35	131.58	156.1	159.05	119.45	144.87	88	94.75	99.75	94.17	95.25	87.25	96.75	93.08	640	690	650	660	650	740	660	683.33	405	320	395	373.33	595	295	350	413.33	99.53	94.54	96.17	96.75	111
1	14	162.6	57.7	21.824	81.9	81.3	76.1	79.77	91.3	81.4	84.2	85.63	96.1	120.35	115.25	110.57	126.2	132.7	129.05	129.32	73.75	70.5	78	74.08	74.5	76.5	77.25	76.08	610	630	580	606.67	690	600	620	636.67	325	355	325	335	360	505	500	455	58.32	64.93	60.11	61.12	61.78
1	10	144.1	31	14.9291	74.5	78	68.9	73.8	68.3	81.5	78.1	75.97	95.6	68.4	60.75	74.92	79.9	86.55	87.1	84.52	76	79.75	87.5	81.08	69.5	71	70.75	70.42	540	530	510	526.67	520	580	530	543.33	385	310	195	296.67	270	320	285	291.67	67.22	59	50.69	58.97	62.82
1	14	169	55.4	19.3971	151.5	134.5	138.5	141.5	143.8	133.9	132.6	136.77	146.25	114.25	103.05	121.18	156.65	133.5	125.15	138.43	98.75	103.25	105.75	102.58	98.75	106.5	101	102.08	630	560	560	583.33	590	560	510	553.33	365	430	390	395	485	495	430	470	75.24	77.58	77.66	76.83	91.65
1	13	155.7	48.3	19.9237	300.5	317.6	299.9	306	330.1	311.9	326.6	322.87	140.1	143.9	152.45	145.48	192.5	177.05	190.45	186.67	149.5	152	148.5	150	165	160.5	157	160.83	640	710	660	670	690	670	690	683.33	380	380	365	375	490	570	565	541.67	97.32	94.42	93.78	95.17	100.2
1	10				149.9	141.2	133.4	141.5	151.9	135.9	134.3	140.7	109.5	91.7	93.3	98.17	132.25	149.05	117.3	132.87	108.25	106.25	103	105.83	101	94.75	101.5	99.08	570	550	510	543.33	630	550	540	573.33	375	405	375	385	460	505	540	501.67	72.11	75.05	72.37	73.18	75.12
1	6	131.4	25.6	14.8269	146.1	142.7	125.4	138.07	140.3	159.5	136	145.27	118.15	116.9	84.6	106.55	101.25	128.65	87.15	105.68	84.75	89	88	87.25	89.75	88.75	85.5	88	670	630	540	613.33	600	680	600	626.67	275	310	310	298.33	250	320	245	271.67	73.53	76.73	82.13	77.46	72.62
1	10	149.6	45.8	20.4646	245	262.2	270.3	259.17	309.6	256.5	274.8	280.3	218.45	163.35	158.9	180.23	164.35	146.5	182.75	164.53	137	123.5	129.25	129.92	135.75	119	125	126.58	870	700	700	756.67	820	650	720	730	485	390	385	420	295	445	565	435	84.58	95.38	90.83	90.26	79.01
1	15	167.5	50.5	17.9996	161.5	141.8	146.2	149.83	166.3	145.7	155.8	155.93	128.1	145.15	117.65	130.3	168.65	118.2	142	142.95	109.25	98.75	106.75	104.92	90.5	109	104	101.17	660	550	590	600	660	580	590	610	555	710	500	588.33	440	475	525	480	84.65	102.33	80.18	89.05	92.32
1	14	176.1	81.1	26.1518	275	288.6	289.8	284.47	309.3	292.1	298.8	300.07	252.2	194.05	167.7	204.65	187.1	147.65	153.95	162.9	129.75	145.25	142	139	148.75	150.75	152	150.5	620	620	610	616.67	650	630	650	643.33	690	535	440	555	495	470	410	458.33	110.48	111.2	105.89	109.19	110.32
1	9				295.6	313.9	310.8	306.77	314	293.1	303.1	303.4	144.75	163.4	180.9	163.02	187.6	146.7	183.85	172.72	158.5	158.75	156.5	157.92	149.75	159.5	156.25	155.17	700	680	690	690	700	710	710	706.67	535	490	610	545	675	510	690	625	91.95	109.13	108.89	103.32	112.26
1	11	153	45.2	19.3088	112.3	106.7	109.4	109.47	103.1	106.5	98.8	102.8	92.7	67.7	83.15	81.18	77.45	106.85	65.4	83.23	101.25	98	109	102.75	105.75	107.75	105.75	106.42	600	600	580	593.33	590	590	550	576.67	400	180	405	328.33	305	400	240	315	73	57.1	70.4	66.83	61.9
1	14	160.1	63.4	24.7347	138.2	133.3	128.5	133.33	131.4	152.4	124.5	136.1	88.2	93.7	74.35	85.42	128.75	149.15	106.4	128.1	99.5	97.5	89.5	95.5	91.75	97.75	92	93.83	700	680	660	680	700	760	660	706.67	235	230	175	213.33	365	395	325	361.67	64.48	63.13	64.02	63.88	65.42
1	13	159.5	67.1	26.3755	162.7	165.7	178.8	169.07	166	173.2	176.3	171.83	102.1	136.6	143.85	127.52	127.35	108.9	137.4	124.55	113.25	109	121	114.42	107.75	108.5	102.5	106.25	500	500	580	526.67	510	530	580	540	420	450	540	470	575	525	510	536.67	88.63	101.59	87.19	92.47	105.94
1	9	128.2	23.8	14.4811	231.1	214.7	220.8	222.2	222.7	236.8	222.5	227.33	233.4	168.9	200.55	200.95	270.75	253.9	190.45	238.37	96.75	104.75	98.25	99.92	101.5	110.5	110.25	107.42	800	730	760	763.33	790	820	750	786.67	550	475	485	503.33	530	530	445	501.67	99.33	89.87	93.12	94.11	85.31
1	15	160	56.7	22.1484	234.7	207	220.6	220.77	233.7	216.4	229.2	226.43	125.3	121.95	111.45	119.57	115.85	111.8	122.85	116.83	122.25	120.25	120.5	121	123	122	122	122.33	640	590	620	616.67	640	600	630	623.33	375	370	335	360	315	360	380	351.67	85.81	86.55	82.58	84.98	85.71
1	12	157.2	48.1	19.4644	210.9	213.1	231.5	218.5	213.8	218.3	219.5	217.2	164.65	162.75	202.65	176.68	196.55	274.65	165.1	212.1	110	107.25	109.25	108.83	103.5	97.25	112.5	104.42	580	590	620	596.67	600	600	590	596.67	595	590	510	565	535	695	585	605	108	108.74	100.93	105.89	100.18
1	10	143.6	39.4	19.1068	103.2	98.4	101.1	100.9	110.6	101.5	101.7	104.6	142	122.05	134.9	132.98	123.5	100.6	92.65	105.58	74	80.25	74.5	76.25	75	72.75	76.25	74.67	640	590	620	616.67	620	590	590	600	470	385	445	433.33	330	300	255	295	82.13	77.71	79.06	79.63	80.67
1	12	152	38.7	16.7503	85	133.1	100.7	106.27	91.5	103.9	104.4	99.93	81.85	102.5	88.1	90.82	91.3	84.45	84.3	86.68	68.75	70.25	74.25	71.08	77	75.25	76.5	76.25	520	760	650	643.33	560	670	630	620	310	285	230	275	350	180	210	246.67	77.62	74.8	64.38	72.27	78.65
1	11	148.8	35.3	15.943	93.7	98.5	95.2	95.8	102.5	104.1	89.9	98.83	78.4	74.7	101.95	85.02	84.4	82.9	77.45	81.58	86.25	80.25	85.25	83.92	87	84.5	82.5	84.67	460	490	470	473.33	490	490	430	470	430	320	390	380	355	325	380	353.33	75.74	76.68	82.64	78.35	74.54
1	12	153.7	56.3	23.832	217.6	207	195	206.53	233.2	220.8	210.7	221.57	123.25	123.9	118.55	121.9	130	141.05	115.2	128.75	119.75	121.75	124	121.83	125.5	128	126.75	126.75	650	590	560	600	650	620	570	613.33	390	440	440	423.33	375	400	455	410	87.87	93.69	91.78	91.11	90.58
1	12	147	35.5	16.4283	126.4	117.9	126.8	123.7	128.2	129.1	129.5	128.93	113.05	114	104.35	110.47	149.05	119.2	135.1	134.45	108	101.5	111.25	106.92	110.5	102.75	111.5	108.25	520	500	520	513.33	550	570	540	553.33	665	640	585	630	570	470	600	546.67	98.87	98.44	85.93	94.41	89.36
1	8	132.5	26	14.8095	163.2	168.6	152.4	161.4	189.2	192.9	162.6	181.57	89.55	96.5	84.6	90.22	105.8	113.3	89.95	103.02	112.5	115.25	122.75	116.83	107	111.5	110.75	109.75	510	570	470	516.67	600	580	530	570	335	265	345	315	260	340	290	296.67	83	79.61	84.89	82.5	85.09
1	8				156.9	150.9	146.6	151.47	145.8	144.5	153.3	147.87	118.65	146.45	101.25	122.12	131.1	90.95	96.15	106.07	96.75	95.5	90	94.08	97	92.75	94.75	94.83	710	720	680	703.33	670	690	700	686.67	335	385	300	340	395	215	255	288.33	74.39	70.1	80.29	74.93	71.79
1	14	173	53.8	17.9759	247.7	294.6	250.8	264.37	283.1	273	267.9	274.67	154.95	187.85	277.65	206.82	147.4	179.75	230.6	185.92	139	142.5	105.5	129	156.75	149.25	139.25	148.42	730	850	750	776.67	790	790	770	783.33	310	385	645	446.67	310	385	600	431.67	72.98	84.91	90.4	82.76	73.66
1	14	153.2	59.3	25.266	249.1	255.4	241	248.5	243.1	247	251.3	247.13	147.15	146	139.85	144.33	164.4	167	175.05	168.82	127.5	121.5	127.5	125.5	129.75	127.25	131.75	129.58	630	650	610	630	640	640	650	643.33	325	330	360	338.33	385	370	390	381.67	104.93	104.27	109.63	106.28	105.7
1	6	118.4	20	14.2668	223.6	204.9	219.6	216.03	220.5	192.2	206.7	206.47	112.6	110	110.55	111.05	107.85	100.85	97	101.9	129.25	138	125.25	130.83	128.25	129.5	133.75	130.5	590	540	570	566.67	590	520	560	556.67	300	360	315	325	280	380	295	318.33	93.07	91.84	99.85	94.92	85.93
1	7	136.7	28.5	15.2513	135.7	119.9	134.4	130	136.2	132.8	122.1	130.37	111.35	116	108.85	112.07	106.4	96.4	92.2	98.33	96.75	97	100	97.92	103	98.25	96.75	99.33	620	550	610	593.33	600	590	570	586.67	425	465	475	455	480	305	330	371.67	96.47	86.61	91.97	91.68	97.95
1	10	131.5	24.1	13.9369	238.6	237.5	228.9	235	253.3	239.3	245.1	245.9	138.3	160.75	118.55	139.2	181	194.05	149.7	174.92	107.25	106.75	107.75	107.25	107.25	107.5	112.75	109.17	820	760	730	770	810	740	780	776.67	280	315	265	286.67	370	430	255	351.67	85.07	83.14	82.23	83.48	80.41
1	10	145.8	33.5	15.759	106.4	92.4	95.2	98	102.1	87	90.5	93.2	83.05	66.6	82.6	77.42	63.4	69.2	64.9	65.83	91	95	93.75	93.25	94.5	95.5	105.25	98.42	570	460	480	503.33	540	470	460	490	380	395	405	393.33	185	285	310	260	73.08	78.76	76.52	76.12	58.68
1	12				130.9	128.7	127.8	129.13	131.3	128	127	128.77	88.35	95.7	86.3	90.12	107.85	105.95	97.85	103.88	86.75	90	81	85.92	94.75	90	93	92.58	640	620	630	630	650	630	630	636.67	250	295	310	285	445	365	290	366.67	68.65	68.82	70.31	69.26	69.25
1	12	152.7	41.6	17.8408	116.8	131.4	131.9	126.7	122.3	136.7	130	129.67	97.45	106.65	97.65	100.58	86.2	124.65	88.35	99.73	96.25	98	95.25	96.5	99.5	89.5	97.25	95.42	580	660	650	630	610	650	620	626.67	260	315	260	278.33	250	355	340	315	65.84	65.87	69.97	67.23	63.08
1	7	126.9	23.1	14.3446	111.1	90.8	96.7	99.53	94.5	106.8	99.3	100.2	85.95	68.5	71.55	75.33	71.85	80.5	88.55	80.3	88.25	91.75	85.75	88.58	84.75	84	88.75	85.83	660	550	590	600	580	630	610	606.67	255	290	215	253.33	245	195	255	231.67	64.48	62.7	58	61.73	60.68
1	10	137.6	26.5	13.9962	197.6	197	214.9	203.17	207.6	201.2	209.3	206.03	203.4	192.25	188.85	194.83	190.4	196.35	167.75	184.83	83.5	83	87.75	84.75	90	89	90.5	89.83	710	720	730	720	730	730	740	733.33	525	475	450	483.33	515	410	370	431.67	99.34	92.95	92.88	95.06	105.29
1	11	147	39.1	18.0943	313.1	336.8	340	329.97	333.9	340.2	353.3	342.47	153.25	156.2	159.75	156.4	134.75	150.6	154.2	146.52	126.5	131.5	137.25	131.75	144.75	149.5	147.75	147.33	760	790	810	786.67	820	800	820	813.33	280	335	310	308.33	260	295	290	281.67	85.82	93.56	89.88	89.7533	80.98
1	8				153.6	167.6	164.1	161.77	173.7	183.8	174.9	177.47	91.95	101.05	85.35	92.78	86.3	89.5	89.45	88.42	103.5	98.75	102.75	101.67	107	107.25	106.25	106.83	610	660	660	643.33	650	710	670	676.67	215	230	210	218.33	210	190	220	206.67	66.05	64.01	67.59	65.88	71.64
1	6	123.7	22.1	14.4428	165.2	156	159.8	160.33	156	159.6	157.3	157.63	100.7	104.4	94.4	99.83	95.35	96.3	94.95	95.53	110.75	103.75	106	106.83	112.5	107.75	108.25	109.5	670	650	650	656.67	620	620	620	620	415	300	355	356.67	285	280	285	283.33	79.65	75.27	74.43	76.45	75.24
1	6	124.5	21.4	13.8062	124.7	129.8	119.6	124.7	119.8	125.6	120.5	121.97	108.6	87.35	92.55	96.17	101.35	123.15	101.05	108.52	94.75	96.5	90	93.75	88	90	87.25	88.42	650	660	610	640	630	620	630	626.67	275	250	250	258.33	245	290	230	255	65.16	62.8	64.39	64.12	71.61
1	7	120.8	22.4	15.3502	250.7	282.4	242.1	258.4	241.7	249.8	236.4	242.63	183.3	176.8	181.55	180.55	192.2	172.7	193	185.97	150.5	162.5	163.75	158.92	132.75	143	133.75	136.5	670	750	650	690	690	670	690	683.33	720	505	595	606.67	685	680	705	690	91.87	79.15	82.77	84.6	99.06
1	7	129.5	24.6	14.6688	174.7	141.9	139.8	152.13	155.1	167.6	131.4	151.37	132.3	113.15	109.7	118.38	98.25	156.15	115.7	123.37	84.75	92.25	91	89.33	87	78.75	80.5	82.08	980	780	750	836.67	870	1030	740	880	260	225	275	253.33	165	290	245	233.33	56.89	61.94	72.4	63.74	57.47
1	9	151	37.8	16.5782	116.5	116.5	118	117	117.8	110.6	113	113.8	79.95	93	79.95	84.3	87.65	88.3	75.45	83.8	92.25	104	94.75	97	91.75	97.75	99	96.17	550	550	560	553.33	580	550	550	560	310	295	295	300	400	385	285	356.67	72.22	71.17	76.03	73.14	78.68
1	15	171.8	64.4	21.8192	97.4	87.7	82.4	89.17	94.6	94.3	85.5	91.47	101.7	96.15	94.65	97.5	83	85	84.2	84.07	70.25	71.5	78.25	73.33	79.75	74	74.75	76.17	640	590	500	576.67	560	570	480	536.67	270	330	425	341.67	245	235	365	281.67	60.02	61.05	77.62	66.23	59.81
1	9	150	46.8	20.8	271.1	239.1	258	256.07	289.9	267.5		278.7	141	109.6	131.8	127.47	129.45	121.1		125.28	136	133.25	124.25	131.17	129	134.25		131.63	690	620	660	656.67	720	670		695	410	315	415	380	315	390		352.5	87.17	82.5	93.94	87.87	79.96
1	13	158.9	44.5	17.6243	228.9	221.6	231.5	227.33	223.4	232.3	233.4	229.7	114.55	105.7	113.45	111.23	127	117.8	138.05	127.62	130.75	142.5	141	138.08	139	145.75	149.75	144.83	640	620	630	630	640	650	650	646.67	385	340	395	373.33	400	325	350	358.33	91.14	75.65	87.77	84.85	76.56
1	10	159.6	49.7	19.5115	110.6	110.4	119.8	113.6	107.3	114	118.7	113.33	109.6	115.4	130.75	118.58	102.6	115.6	125.65	114.62	81.25	79.25	79.25	79.92	82.25	83	82.5	82.58	570	550	610	576.67	550	570	590	570	350	405	385	380	465	360	455	426.67	84.91	86.75	82.07	84.58	79.06
1	11	150.2	31.4	13.9184	106.9	106.9	98.2	104	105.5	113.4	109.8	109.57	84.7	85.2	77.55	82.48	89.25	96.2	97.8	94.42	73.5	67.5	63	68	78	68.25	71.25	72.5	610	600	540	583.33	600	640	610	616.67	265	255	305	275	305	330	330	321.67	72.13	70.52	78.83	73.83	76.27
1	9	138.9	27.5	14.2537	99.9	102.4	113.9	105.4	110.1	112.1	110.6	110.93	92.55	81.45	88.1	87.37	77.95	96.1	89.75	87.93	86.5	98.25	95.75	93.5	96.75	96.5	103.25	98.83	490	470	540	500	510	550	560	540	290	385	295	323.33	225	265	260	250	67.99	69.21	63.07	66.76	66.96
1	7	128	29.2	17.8223	109.8	116.4	114.5	113.57	115	118.5	120.9	118.13	105	83.4	89.7	92.7	91.95	83.75	119.9	98.53	88.25	98	102.25	96.17	97.75	100.5	96.25	98.17	510	540	530	526.67	520	510	540	523.33	305	310	360	325	335	345	345	341.67	85.47	87.39	86.12	86.33	79.6
1	11	145.5	34.2	16.1547	144	149.8	155.8	149.87	138.8	163.5	151.5	151.27	87.15	87.9	88.05	87.7	108.8	106.9	99.65	105.12	97.75	96.25	108	100.67	82.5	98.75	88.75	90	590	630	600	606.67	580	650	600	610	245	255	255	251.67	300	340	335	325	80.04	77.34	75.36	77.58	93.76
1	11	152.6	40.7	17.4777	331.9	299.9	271.6	301.13	315	266.5	275.9	285.8	139.9	141.35	110.5	130.58	154.75	152.35	129.8	145.63	138.75	150.25	149.5	146.17	141.75	139.75	145.25	142.25	710	610	550	623.33	690	570	570	610	350	455	310	371.67	355	590	490	478.33	96.42	104.93	98.44	99.93	95.06
1	9	147	36.1	16.706	134.8	133	131.9	133.23	136.1	133.8	130.3	133.4	123.7	105.95	111.05	113.57	87.75	105.25	94.05	95.68	85.25	83	87.5	85.25	82	90.75	85.5	86.08	710	640	630	660	690	680	660	676.67	305	370	395	356.67	200	250	215	221.67	67.57	75.03	75.57	72.72	68.19
1	9	149.7	39.2	17.4921	114.4	127.8	113.3	118.5	120.1	120.7	118.3	119.7	116.9	132.85	107.45	119.07	110.7	123.3	112.95	115.65	81.5	89.5	93	88	91.75	86	85.75	87.83	570	620	540	576.67	570	580	580	576.67	455	585	410	483.33	510	395	355	420	82.58	92.43	84.25	86.42	87.37
1	10	153.4	43.4	18.4433	152.1	144.8	161.4	152.77	146.6	144.4	159.7	150.23	130	142.6	147.7	140.1	124.55	145.65	148.4	139.53	86.75	73	91.5	83.75	82.25	88.75	88.75	86.58	760	700	740	733.33	700	690	770	720	380	395	350	375	290	455	390	378.33	77.97	85.84	80.33	81.38	72.29
1	8	138.5	29.9	15.5873	157.4	149.4	150.2	152.33	151.7	151.7	141.8	148.4	168.1	163.05	142.2	157.78	208.7	128.75	89.8	142.42	106.5	105	99.75	103.75	82.25	100.25	106	96.17	670	650	650	656.67	670	660	650	660	690	645	570	635	800	445	265	503.33	73.97	76.82	76.2	75.66	96.66
1	14	157.4	49.8	20.1011	254.6	243.8	268.7	255.7	264.3	230.3	238	244.2	127.15	147.05	196.25	156.82	196.05	123.15	137.8	152.33	135.25	136	141.75	137.67	129	132.25	131	130.75	730	700	740	723.33	770	670	670	703.33	290	370	470	376.67	485	320	390	398.33	78.27	84.42	82.74	81.81	76.41
1	11	145	29.9	14.2212	120.3	115.3	115.5	117.03	147.3	120.3	121.3	129.63	87.15	87.8	87.6	87.52	101.1	86.15	92.7	93.32	87.25	97.25	95.75	93.42	101.25	97.75	98	99	650	610	590	616.67	740	630	620	663.33	190	225	320	245	400	265	365	343.33	70.14	66.25	76.74	71.04	75.62
1	7	136	40.5	21.8966	326.1	385.2	378.9	363.4	359.5	332.6	333.9	342	139.95	223.4	211.55	191.63	138.25	146.65	174.75	153.22	159.5	148.5	165	157.67	170.25	170.25	170.75	170.42	640	710	720	690	660	670	650	660	380	530	520	476.67	330	395	440	388.33	90.92	100.14	97.11	96.06	92.11
1	9	143	36	17.6048	181.6	180.3	191.5	184.47	203.8	200.8	203.8	202.8	126.3	162.55	154.35	147.73	144.65	142.5	137.45	141.53	104.75	98	105.75	102.83	110.25	111.75	119.25	113.75	640	630	650	640	700	670	650	673.33	350	435	460	415	345	450	590	461.67	83.27	88.11	93.04	88.14	78.72
1	9	135.2	28.8	15.7558	78.3	77.1	75.7	77.03	81.8	75.6	71.2	76.2	76.9	80.4	82.2	79.83	71.4	60.75	72.35	68.17	70.25	72.5	69.75	70.83	73.5	71.25	68.5	71.08	470	470	450	463.33	500	470	440	470	350	335	365	350	330	240	305	291.67	73.31	71.28	77.38	73.99	70.77
1	6	129	32.1	19.2897	150	153.7	141.4	148.37	149.3	150	140.9	146.73	137.45	89.1	77.4	101.32	91.2	96.8	109.6	99.2	84.75	98.25	102.75	95.25	93.5	95.25	93	93.92	760	720	650	710	710	710	680	700	355	185	180	240	200	225	275	233.33	70.69	63.79	61.47	65.32	66.04
1	8	126.3	21.7	13.6036	165.1	165.3	167.2	165.87	163.3	163.6	172.1	166.33	109.25	103.25	106.25	106.25	108.75	110.9	117.65	112.43	106.25	109	113	109.42	107.5	104.75	110.25	107.5	610	560	580	583.33	580	570	600	583.33	255	330	365	316.67	305	345	365	338.33	79.75	84.6	88.17	84.17	87.65
1	8	144.1	61.6	29.6656	113.1	111.7	126.8	117.2	120.2	106.5	119.3	115.33	83.1	74.35	86.15	81.2	90.55	87.55	83.55	87.22	83.5	84	92.25	86.58	94.5	86.25	94.5	91.75	530	550	590	556.67	540	500	590	543.33	275	190	260	241.67	260	230	205	231.67	81.09	63.39	75.62	73.37	79.91
1	8	153.2	41.4	17.6394	168.3	160.1	161.1	163.17	163.8	178.2	157.3	166.43	108.35	90.5	97.95	98.93	94.95	96	122.65	104.53	118.5	121.75	114.75	118.33	121.5	116.5	118.25	118.75	620	590	600	603.33	610	620	570	600	285	260	265	270	280	310	355	315	68.12	68.74	70.41	69.09	68.49
1	6				143.8	119.5	128.7	130.67	137.8	122.3	120.2	126.77	170.1	106.15	98.4	124.88	241.9	97.8	102	147.23	87.25	81.75	79	82.67	85.5	85	80.25	83.58	700	620	650	656.67	720	620	630	656.67	670	375	230	425	565	265	295	375	93.7	67.49	65.22	75.47	78.49
1	10	145.5	30.6	14.4542	249.8	237.9	235.5	241.07	261.4	244.8	256.1	254.1	242.95	252.7	245.75	247.13	165.65	210.35	199	191.67	121	116.25	111.5	116.25	129.75	122.5	131.5	127.92	630	570	540	580	600	550	630	593.33	720	730	690	713.33	610	685	705	666.67	119.12	122.47	129	123.53	117.78
1	12	163.7	52.1	19.442	123	134.7	113.6	123.77	129.3	125.2	125.1	126.53	167.8	94.8	97.6	120.07	126.45	90.75	92.05	103.08	91	93.25	94.75	93	95.25	95.5	92.5	94.42	660	690	630	660	680	630	630	646.67	415	200	295	303.33	345	220	260	275	64.74	56.05	58.35	59.71	63.28
1	11	153	31.7	13.5418	147.5	107.9	114.3	123.23	138.2	112.5	133	127.9	83.9	81.65	82.6	82.72	97.6	82.8	79.4	86.6	89	90.5	93.5	91	86.5	94.5	88	89.67	910	570	610	696.67	740	580	680	666.67	145	275	265	228.33	270	310	205	261.67	54.89	70.58	67.97	64.48	60.75
1	6	116.2	21.4	15.849	102.8	98	101.9	100.9	97.4	100.5	98.1	98.67	78.45	72.15	86.05	78.88	70.05	92.95	86.5	83.17	84.25	82.75	83.5	83.5	79.25	77.5	71.25	76	540	510	520	523.33	500	520	500	506.67	250	240	270	253.33	210	260	260	243.33	73.16	74.8	75.37	74.44	76.83
1	10				169.3	174.7	184.8	176.27	88.3	178.9	191.6	152.93	166.4	152.05	151.5	156.65	48.95	111.15	126.35	95.48	113.25	128.75	126.5	122.83	112	128	129.75	123.25	510	520	540	523.33	330	520	560	470	615	610	555	593.33	260	760	640	553.33	102.75	97.42	99.24	99.8	64.13
1	8	130.3	28.8	16.963	251.2	229.6	237.6	239.47	254.4	238.4	242.6	245.13	161.55	150.55	145.2	152.43	141.65	148.65	145.05	145.12	104.5	108.5	105.75	106.25	114.5	110.5	119	114.67	720	660	660	680	720	690	670	693.33	350	315	355	340	245	330	280	285	97.85	96.61	99.01	97.82	83.13
1	14	172	60	20.2812	180.3	193.8	181.5	185.2	187.7	184.5	200.2	190.8	119.7	161.8	151.6	144.37	117.65	171.6	123.65	137.63	109.5	103.5	107.75	106.92	116.5	101.25	108.25	108.67	640	700	660	666.67	650	650	710	670	410	480	368	419.33	385	520	310	405	86.53	84.02	80.42	83.66	81.19
1	12	148.8	32.5	14.6784	123.5	122.8	112.8	119.7	123.7	119.2	110.8	117.9	111.25	120.4	121.05	117.57	109.4	122.55	125.33	119.09	84.5	85.25	78.75	82.83	87	89.25	87.25	87.83	560	570	520	550	580	550	510	546.67	365	575	750	563.33	455	475	465	465	86.41	88.86	100.97	92.08	84.17
1	11	163.3	62.3	23.3623	162.8	156.8	152.6	157.4	174	159.6	156.4	163.33	146.55	134.1	130.85	137.17	129.25	122.35	148.45	133.35	100.5	105	107.25	104.25	105.75	108	113	108.92	650	600	600	616.67	680	600	580	620	540	430	480	483.33	290	430	490	403.33	99.48	90.5	94.91	94.96	79
1	7	141	35.8	18.0071	135.4	134.8	145	138.4	152.3	151.9	161.3	155.17	92.8	85.65	96.05	91.5	87.7	93	95.85	92.18	114.5	116.5	115	115.33	116.75	120.25	117.5	118.17	510	510	530	516.67	540	560	560	553.33	375	385	305	355	370	485	490	448.33	86.59	85.29	84.67	85.52	93.99
1	6	117.2	17.1	12.4492	119.6	116.8	119.9	118.77	119.6	106.5	114.5	113.53	107	84.45	121.1	104.18	106.15	118.15	94.3	106.2	106.5	101.5	99.5	102.5	102.5	93	105.75	100.42	580	580	590	583.33	570	540	590	566.67	410	360	495	421.67	495	500	385	460	74.55	66.79	79.07	73.47	76.2
1	12	158	42.3	16.9444	114	128.3	109.1	117.13	122.1	134.5	104.5	120.37	88.3	113.35	81.3	94.32	97.7	104.75	90.8	97.75	104.75	100.25	96.25	100.42	101	103.5	92	98.83	600	650	580	610	660	670	570	633.33	340	410	280	343.33	350	525	245	373.33	63.31	77.51	67.09	69.3	68.44
1	8	122.1	21.2	14.2202	116.5	117.9	104.1	112.83	113	123.2	113	116.4	97.6	135.8	144.4	125.93	104.45	112.35	103.9	106.9	101.75	118.5	90.5	103.58	106.5	104.25	105.25	105.33	530	510	470	503.33	480	550	500	510	505	835	685	675	750	715	520	661.67	83.37	84.28	86.91	84.85	84.2
1	12	164	45.1	16.7683	113.8	124.8	118.2	118.93	119.1	114.6	117.7	117.13	107.7	93.75	112.85	104.77	114.35	92.05	88.85	98.42	86.5	92.5	86	88.33	80.5	79.75	85.25	81.83	530	560	550	546.67	580	560	550	563.33	340	380	500	406.67	315	285	375	325	72.1	74.51	81.45	76.02	77.38
1	13	137.5	29.7	15.7091	257.8	243.4	233.7	244.97	257.8	249.5	243	250.1	143.6	160	125.45	143.02	126.3	145.55	177.85	149.9	126.75	128	122.75	125.83	121.5	130	125.75	125.75	830	780	750	786.67	820	800	800	806.67	345	390	325	353.33	240	280	360	293.33	75.14	71.38	77.41	74.6433	75.42
1	6	124.7	24.3	15.6269	225.8	191.3	223.2	213.43	193.8	211	218.2	207.67	179.25	118.5	192.35	163.37	168.4	138.55	208.65	171.87	105.25	114	100.75	106.67	103.75	104.75	115.25	107.92	760	630	740	710	670	670	700	680	425	315	435	391.67	470	350	530	450	88.55	83.21	100.3	90.69	91.49
1	12	162.1	47.1	17.9248	362	344	336	347.33	389.5	374	360.1	374.53	150.1	148.75	144.1	147.65	254.25	159.7	203.05	205.67	146.25	139.75	148.5	144.83	156	147.5	147.25	150.25	730	710	680	706.67	770	720	700	730	395	380	325	366.67	565	360	645	523.33	93.32	97.1	92.73	94.38	92.31
1	12	165.4	47.4	17.3264	164.1	169.4	167.6	167.03	172.5	166.4	158.2	165.7	105.7	121.1	119.15	115.32	152.75	100	195.9	149.55	116.5	107.5	107.75	110.58	96.75	109.5	92	99.42	580	610	620	603.33	630	590	600	606.67	270	340	330	313.33	415	225	665	435	76.79	77.88	76.66	77.11	82.26
1	7	130.7	25.7	15.0446	193.3	210.5	199.1	200.97	218.6	211.4	202.7	210.9	197.55	162.6	107.25	155.8	122.55	116.1	117.1	118.58	104.25	111.25	117	110.83	126.25	117.5	116.75	120.17	730	750	720	733.33	760	760	710	743.33	465	375	255	365	260	220	240	240	76.62	90.17	76.97	81.25	78.79
1	13	157.6	45.2	18.1981	191.6	179.3	187.3	186.07	183.7	190.4	206.2	193.43	151.55	126.8	154.45	144.27	134.8	126.15	134.9	131.95	110	109.25	105.75	108.33	112.25	117.25	117.25	115.58	690	660	690	680	710	680	740	710	380	350	455	395	315	345	375	345	74.72	74.16	74.76	74.55	72.98
1	6	117.4	19.4	14.0756	169.9	145.7	161.9	159.17	172.5	146.2	148.7	155.8	146.15	162.35	164.3	157.6	121.7	170.8	128.45	140.32	111	111.5	112.5	111.67	120.25	109.25	106	111.83	680	600	660	646.67	690	600	590	626.67	440	565	555	520	325	555	410	430	72.52	80.93	76.42	76.62	67.78
1	11	156.5	41.8	17.0666	116.5	125.8	133.5	125.27	116	116.8	130.2	121	141.1	105.8	97.05	114.65	136.25	87.9	101.2	108.45	84.5	87.5	90.25	87.42	84.5	92	94.5	90.33	540	600	680	606.67	560	570	630	586.67	780	350	235	455	565	295	290	383.33	107.06	79.36	60.1	82.17	93.08
1	15	156.9	55	22.3417	179.5	183.9	184.5	182.63	178	187.5	200.2	188.57	184.45	152.9	162.55	166.63	186.3	156.05	153.75	165.37	102.75	98.75	108.5	103.33	101.75	99.75	105.25	102.25	660	660	690	670	640	680	690	670	600	340	475	471.67	495	390	425	436.67	76.06	77.57	72.03	75.22	85.49
1	10	144.2	35.7	17.1687	265.4	278.7	276.7	273.6	296.3	295.6	276.9	289.6	191.25	169.3	170.95	177.17	191.95	177.2	176.15	181.77	128.5	132	133.75	131.42	109	119	122.25	116.75	670	690	680	680	760	750	680	730	415	400	360	391.67	455	360	465	426.67	95.54	87.54	91.79	91.62	99.09
1	15	169.5	51.2	17.8209	125.2	130.9	140.8	132.3	142.6	144.2	141.9	142.9	75.45	98.9	105.95	93.43	111.95	106.6	149.5	122.68	119.5	130	133.5	127.67	118.75	118.25	128	121.67	600	610	610	606.67	610	620	600	610	230	320	395	315	340	350	470	386.67	57.59	58.28	63.7	59.86	72.31
1	13	169.1	56.3	19.6889	305.1	312.8	308.4	308.77	311	303.9		307.45	236.5	229.45	155.55	207.17	128.1	140		134.05	122.5	119.25	124	121.92	122.25	119.5		120.88	720	730	710	720	710	720		715	570	530	360	486.67	235	260		247.5	100.66	96.04	92.24	96.3133	91.81
1	9	145.2	48.4	22.9568	165.9	160.6	154.3	160.27	151	150	148.3	149.77	117.65	128.85	123.15	123.22	154.9	152.1	90.9	132.63	102.75	104.75	103.25	103.58	100.75	98.5	97.75	99	660	660	620	646.67	680	620	590	630	355	375	380	370	380	385	240	335	77.12	76.97	78.18	77.42	68.54
1	8	125.4	27.2	17.2971	212.3	222.5	215.7	216.83	219.4	226.1	240.2	228.57	126.85	124.65	118.95	123.48	133.7	119.8	123.95	125.82	126.25	126.25	133.75	128.75	132.5	137.25	150.75	140.17	620	630	630	626.67	640	640	660	646.67	375	355	415	381.67	405	525	445	458.33	94.72	97.31	98.7	96.91	100.02
1	8	125	26.9	17.216	117.4	120.5	117	118.3	115	119	118	117.33	91.25	95.6	100.1	95.65	85.75	85.45	110.1	93.77	103.5	101.5	98	101	97.25	100.75	97	98.33	620	610	600	610	560	600	610	590	270	420	330	340	335	245	390	323.33	66.46	79.84	73.29	73.2	71.49
1	12	147.7	35	16.0438	168.8	171.2	139.6	159.87	160.9	142.2	148.5	150.53	134	142.85	119.05	131.97	122.75	131.6	125.45	126.6	104	102.5	100	102.17	108.5	103.5	98.5	103.5	710	670	600	660	680	630	630	646.67	385	535	355	425	400	420	285	368.33	84.33	95.18	79.76	86.42	84.08
1	8	130.6	25.3	14.8332	148.4	135.3	131.6	138.43	144.3	137.2	128	136.5	84.7	123.45	107.2	105.12	95.8	109.55	87.8	97.72	90	94.75	94.75	93.17	88.5	91.5	93.25	91.08	740	660	630	676.67	710	710	630	683.33	210	370	360	313.33	235	230	270	245	57.72	64.78	71.21	64.57	63.16
1	7	123.9	24.9	16.2202	102.1	99.7	98.7	100.17	93.6	91.1	98.2	94.3	78.15	75.6	76.95	76.9	62.55	67.15	64.5	64.73	94.75	98.25	92.75	95.25	93	91	92	92	570	550	530	550	500	500	530	510	250	280	370	300	310	320	220	283.33	63.55	63.61	75.31	67.49	70.66
1	6	124	29.2	18.9906	143.1	131.9	146.4	140.47	137.6	138.3	159.6	145.17	100.3	111.4	151.25	120.98	99.4	94	131.45	108.28	101.75	98.75	101	100.5	99.25	111.75	107	106	610	520	600	576.67	560	550	630	580	255	380	490	375	275	290	320	295	72.32	89.22	78.51	80.02	79.24
1	8	137.5	23.3	12.324	228.2	207.5	198.9	211.53	255.5	196.2	202.4	218.03	141.2	140.65	135.05	138.97	182.6	130.6	135.45	149.55	122.5	123	117	120.83	126.25	122.75	124.25	124.42	790	670	690	716.67	840	630	670	713.33	430	545	420	465	380	440	395	405	73.38	80.54	79.94	77.95	71.15
1	12				354.3	357.3	358.4	356.67	374.3	342.4		358.35	244.4	235.45	194.5	224.78	269.2	191.45		230.33	135.75	133	146	138.25	128.25	130.5		129.38	750	740	770	753.33	790	710		750	705	805	615	708.33	605	530		567.5	101.5	100.34	94.27	98.7	96.86
1	15	158	56.8	22.7528	162.2	158.5	138.3	153	162.7	141	143.6	149.1	95.35	102.25	85.9	94.5	111.2	97.3	105	104.5	94	89.25	100	94.42	84.5	94	94.5	91	700	690	610	666.67	710	620	600	643.33	210	260	230	233.33	250	245	290	261.67	70.25	75.15	68.47	71.29	72.07
1	10	125.7	26.9	17.0248	147.3	135	140.5	140.93	150	146.8	146.9	147.9	91.5	95.55	114.2	100.42	98.65	92.75	97.3	96.23	92.75	96.25	98	95.67	104.25	107.75	110.5	107.5	600	560	580	580	600	620	610	610	270	285	365	306.67	305	215	225	248.33	79.42	77.42	74.29	77.04	80.13
1	8	133.9	27.7	15.4496	279.8	255.6	284.7	273.37	279.2	299.3	297.4	291.97	193.7	114.7	145.8	151.4	290.55	155.95	190.6	212.37	142.75	136	150.5	143.08	145.25	144.5	146	145.25	770	750	800	773.33	780	820	810	803.33	425	270	270	321.67	850	395	565	603.33	71.87	76.9	74.57	74.4467	77.13
1	10				158	162.1	158.5	159.53	215.9	162	153.9	177.27	152.2	133.5	131.55	139.08	145.5	113.6	107.05	122.05	99	99.75	95.25	98	94.75	102	98.75	98.5	650	620	610	626.67	920	640	640	733.33	455	405	365	408.33	255	330	310	298.33	80.28	81.34	84.03	81.88	66.89
1	12	164.4	56.4	20.8677	158.6	143	147.3	149.63	150	160.5	146.2	152.23	140.85	100.45	122.25	121.18	99.55	122.3	113.6	111.82	107.5	107	104	106.17	101	106	107	104.67	650	610	610	623.33	620	720	600	646.67	395	265	410	356.67	385	300	340	341.67	84.84	73.52	85.73	81.36	87.55
1	8	130	25.1	14.8521	95.3	100.9	103.4	99.87	108.5	107.8	100.2	105.5	79.7	89.45	94.95	88.03	86.3	85.7	96.6	89.53	87	81.5	90	86.17	88	78	80.75	82.25	540	600	580	573.33	610	610	580	600	295	240	320	285	250	285	275	270	69.17	72.33	74.61	72.04	67.02
1	10	120.8	20.5	14.0482	156.2	164.4	169.7	163.43	154.4	146.1	157.8	152.77	124.3	147.1	122.05	131.15	143.55	164.85	157.6	155.33	91.75	93	93.75	92.83	92.5	87.25	95.25	91.67	580	600	600	593.33	580	580	640	600	410	490	595	498.33	435	600	500	511.67	96.76	92.45	110.93	100.05	98.32
1	7	124.3	25.6	16.5691	148.8	147.6	176.5	157.63	149.5	145.9	154.7	150.03	126.95	134.5	158.7	140.05	114.45	106.35	125.25	115.35	122.5	117	116.5	118.67	121.5	123	121.25	121.92	540	540	610	563.33	530	530	580	546.67	500	465	450	471.67	495	410	415	440	74.34	77.07	86.95	79.45	76.34
1	6	122.6	22.6	15.0358	138	141	155	144.67	139.9	144	135	139.63	118.2	127.25	137.45	127.63	127.75	129.7	108.8	122.08	98.75	101.5	106	102.08	100.5	101.75	99.25	100.5	580	610	660	616.67	570	600	570	580	340	375	535	416.67	595	400	345	446.67	77.71	74.2	80.34	77.42	90.27
1	8	138	35.4	18.5885	269.1	252.8	253.7	258.53	279.1	274	278.9	277.33	194.3	145.55	140.7	160.18	150.8	153.15	171.35	158.43	121.5	121.75	120.75	121.33	125.5	121.25	117.75	121.5	660	600	630	630	700	640	670	670	475	515	310	433.33	425	445	450	440	103.72	100.76	90.02	98.17	102.79
1	11	140	32.3	16.4796	174.6	164.6	231.7	190.3	178.9	168.1	213.6	186.87	168.05	174.2	178.65	173.63	112.15	110	167.5	129.88	109.75	110.5	122.25	114.17	113.75	114.5	111.75	113.33	570	570	730	623.33	590	530	740	620	410	605	430	481.67	285	310	355	316.67	88.91	81.21	80.93	83.68	86.4
1	9	137.6	34.5	18.2214	392.6	404.7	398.9	398.73	400.3	488.5	391.2	426.67	155.25	186.05	199.65	180.32	185.95	210.85	192.05	196.28	129.25	130	128.5	129.25	127.75	133.5	132.5	131.25	690	760	690	713.33	700	850	710	753.33	365	360	455	393.33	430	375	400	401.67	102.25	108.73	124.86	111.95	122.17
1	9				172.3	162.3	150.2	161.6	168.1	171.6	158.7	166.13	118.75	110.15	119.85	116.25	106.2	125.4	103.1	111.57	100.5	104.25	93.75	99.5	106.25	97	99.25	100.83	710	680	600	663.33	660	660	600	640	350	325	330	335	305	365	355	341.67	69.94	74.12	84.05	76.04	75.09
1	13	166.6	62.2	22.4099	148.9	146	144.8	146.57	141.2	137.4	142.5	140.37	132.6	129.2	135.4	132.4	157.15	138.05	125.15	140.12	79.25	77	78.25	78.17	92.5	89	97.75	93.08	580	570	550	566.67	560	560	580	566.67	480	415	480	458.33	560	675	475	570	101.14	102.76	105.06	102.99	92.19
1	10	142.6	33	16.2284	83.5	90.9	91.4	88.6	98.1	91.3	98	95.8	74.15	82.2	71.55	75.97	79.65	86.55	77.95	81.38	74.25	67	78.25	73.17	74.25	74.75	75	74.67	570	590	570	576.67	630	560	580	590	205	240	195	213.33	195	225	225	215	59.61	65.8	61.36	62.26	62.71
1	8	133	30.3	17.1293	109.4	100.5	111.8	107.23	112.5	113.2	107.7	111.13	148.75	189.9	161.1	166.58	177.1	149.7	175	167.27	94.5	86	88.5	89.67	95.5	94	90.25	93.25	580	510	570	553.33	540	550	540	543.33	830	1075	710	871.67	1055	915	955	975	96.68	105.78	91.36	97.94	101.69
1	7	129	25.1	15.0832	206.4	219.8	208.4	211.53	217.3	216.5	212.5	215.43	150.9	153.2	158.45	154.18	131.7	145.9	124.7	134.1	113.5	110.75	111.25	111.83	117.75	119	120	118.92	730	780	730	746.67	730	760	730	740	340	335	370	348.33	270	305	255	276.67	76.67	76.68	79.92	77.7567	78.59
1	8	129.3	25.7	15.3722	275.8	265.1	263.2	268.03	262.1	258	249.1	256.4	145.5	139.75	144.5	143.25	178.75	145.5	134.25	152.83	119.75	121	115.75	118.83	119.5	119.5	121	120	720	690	680	696.67	700	700	640	680	315	320	310	315	490	430	300	406.67	87.27	85.23	91.05	87.85	83.69
1	10	151.6	39.3	17.0999	210.1	199.6	205.1	204.93	224.2	218.4	201.2	214.6	149	137.55	244.45	177	145.1	152.25	137.5	144.95	113.25	110	114.25	112.5	104	111.5	109.5	108.33	720	680	700	700	770	730	680	726.67	495	370	635	500	375	385	365	375	76.51	74.98	84.22	78.57	82.08
1	14				182.2	181.2	173.5	178.97	198.8	182.6	173.7	185.03	169.5	125.95	201.55	165.67	165.3	144.1	164.6	158	97.75	88	88.75	91.5	94.25	90	91.25	91.83	720	740	720	726.67	750	770	750	756.67	565	275	510	450	360	265	355	326.67	91.52	70.81	82.96	81.76	85.2
1	6	122.4	20.9	13.9503	147	139.3	130.3	138.87	149.5	135.6	129.9	138.33	93.65	97.45	80.3	90.47	87.15	82.95	78.55	82.88	95.5	99.25	94.5	96.42	93.5	92.5	92.25	92.75	750	670	630	683.33	730	650	620	666.67	200	235	225	220	195	200	190	195	58	68.29	64.13	63.47	60.47
1	9	148.8	26.5	11.9685	198.9	207.1	212.3	206.1	180.2	201.2	203.7	195.03	331.95	242.15	188.2	254.1	294.25	302.85	300.7	299.27	134.75	134.75	152.25	140.58	126.75	130.5	132.25	129.83	720	760	750	743.33	720	780	740	746.67	805	615	625	681.67	835	830	720	795	75.19	74.99	73.16	74.45	77.03
1	10	138.8	28.6	14.8452	183.3	189.6	181.8	184.9	188.4	190.4	193.8	190.87	159.4	113.5	136	136.3	110.6	145.2	102.65	119.48	86.25	83	94.75	88	99	94.5	92.75	95.42	710	710	650	690	690	690	690	690	465	245	365	358.33	200	330	210	246.67	76.97	83.78	84.93	81.89	77.75
1	13	166.3	51.1	18.4772	104.8	101.2	103.5	103.17	99.9	110	115.8	108.57	95.6	80.4	85.6	87.2	106.05	91.7	89.6	95.78	96.25	87.75	90.25	91.42	93.5	96.25	95.5	95.08	660	600	610	623.33	590	610	650	616.67	395	220	215	276.67	475	375	430	426.67	69.88	62.75	59.11	63.91	82.58
1	7	128.5	27.9	16.8965	162	163.2	182	169.07	162.1	152.6	170.4	161.7	120	108.15	127.25	118.47	182.5	116.55	101.3	133.45	101.75	101.5	100.25	101.17	101.75	110	108	106.58	720	760	790	756.67	730	700	750	726.67	300	260	315	291.67	395	330	260	328.33	64.75	63.56	64.25	64.19	62.42
1	13				127.3	140.4	132.4	133.37	129.6	128.6	147.2	135.13	130.4	90.75	76.7	99.28	94.15	94	95.65	94.6	115.25	102.5	96.5	104.75	101.5	101.25	97	99.92	560	600	590	583.33	550	570	630	583.33	420	280	205	301.67	295	280	270	281.67	71.05	71.02	66.45	69.51	76.61
1	7	121	21.3	14.5482	240.6	260.6	248.4	249.87	250.9	272	249.1	257.33	253.85	182.85	269.3	235.33	276.7	275.15	232.6	261.48	110.75	112	110	110.92	105	102	103	103.33	740	800	760	766.67	750	800	780	776.67	705	375	790	623.33	745	765	605	705	90.38	86.88	84.85	87.37	94.73
1	9	147.5	36.3	16.6849	137.9	130.5	130.7	133.03	139.9	137	142.3	139.73	120.85	123.85	126	123.57	126.7	116.9	107.7	117.1	91.25	94.25	93.25	92.92	100.25	97.75	97.5	98.5	540	520	530	530	530	510	520	520	395	550	520	488.33	490	640	445	525	84.59	86.58	84.95	85.37	84.13
1	8	132	33.6	19.2837	198.8	200.1	199.9	199.6	206	201	209.7	205.57	126.5	123	117.75	122.42	133	140.9	138.6	137.5	121.5	125.25	122.75	123.17	121.25	121.5	123.25	122	650	610	620	626.67	670	630	660	653.33	415	430	375	406.67	370	430	395	398.33	88.57	89.86	85.69	88.04	83.69
1	8	133.3	25.6	14.4072	233.3	225.7	213.6	224.2	227	213.5	217.7	219.4	133.75	144.05	140.7	139.5	123.3	103.95	113.8	113.68	119.75	125.5	125.75	123.67	130.25	125.25	132.5	129.33	680	630	610	640	630	620	590	613.33	340	415	430	395	350	265	325	313.33	91.78	91.16	92.12	91.69	89.7
1	7	130.7	24.5	14.3422	102.5	111.7	103.4	105.87	101.4	99.2	114.5	105.03	92.65	126	88.9	102.52	112.65	83.25	99.5	98.47	94.25	109.5	98	100.58	97	100.5	103	100.17	500	530	510	513.33	510	500	550	520	345	435	420	400	340	430	395	388.33	72.08	68.12	74.55	71.58	72.65
1	6	128	22.7	13.855	193.2	185.8	173.1	184.03	185.9	192.7	164.3	180.97	109.35	161.95	129	133.43	129.7	142.2	105.15	125.68	118	120.75	122.25	120.33	116.25	122	121.75	120	720	700	640	686.67	690	720	610	673.33	305	410	355	356.67	295	350	255	300	60.74	79.67	70.04	70.15	75.97
1	7	118.5	20.4	14.5276	192	152.4	168.8	171.07	203.8	177.1	158.6	179.83	185.7	126	146.8	152.83	168.75	145.65	123.3	145.9	111.75	109.75	111	110.83	109	125.75	125.5	120.08	780	650	640	690	820	710	650	726.67	345	290	615	416.67	360	345	290	331.67	73.21	69.93	94.1	79.08	79.33
1	9	132.6	25.4	14.446	164.3	155.3	138.9	152.83	156	158.1	141.2	151.77	145.1	183.9	202.2	177.07	154.85	111.05	104.8	123.57	90	88.75	86.75	88.5	91.5	101.5	100.5	97.83	620	620	560	600	620	620	560	600	525	500	615	546.67	590	450	560	533.33	88.85	82.23	92.25	87.78	87.02
1	7	130	24.2	14.3195	127.3	129	116.3	124.2	142	135.8	112.5	130.1	78.4	78.2	84.1	80.23	106.6	87.8	80.75	91.72	103.75	108.5	100.5	104.25	102.25	97.75	94.5	98.17	580	590	520	563.33	630	590	540	586.67	230	245	315	263.33	370	245	280	298.33	66.34	62.55	74.14	67.68	77.95
1	6	126	25.9	16.3139	112.4	108.2	118.2	112.93	121.9	116.5	113.1	117.17	83.6	81.8	101.85	89.08	92.4	85.45	94.4	90.75	94.75	98.75	98	97.17	98	100.25	92.75	97	490	480	480	483.33	510	530	470	503.33	335	325	605	421.67	430	380	480	430	76.78	75	90.41	80.73	88.9
1	8	131.2	26.4	15.3369	112.9	106.4	99.2	106.17	108	92.7	94	98.23	151.6	123.05	113.95	129.53	100.5	84.1	79	87.87	81.25	77.25	74	77.5	89.75	91.25	84.75	88.58	540	490	460	496.67	560	480	460	500	540	475	460	491.67	270	285	305	286.67	84.92	84.4	76.69	82	72.63
1	7	131.7	25.7	14.817	99.4	76.6	78.2	84.73	100.5	85.8	72.1	86.13	85.95	85.5	86.95	86.13	96.4	81.25	93.7	90.45	81	83.25	83.5	82.58	86	83.75	77.25	82.33	600	470	470	513.33	610	520	460	530	385	445	405	411.67	390	335	390	371.67	76.84	69.62	81.53	76	70.23
1	11	165.9	55.3	20.0924	154.2	153.1	153.2	153.5	185.4	151.7	148.6	161.9	76.4	77.85	75.4	76.55	85.45	83.75	97.6	88.93	105.75	107.5	112.5	108.58	102.75	111.25	113.75	109.25	600	580	600	593.33	800	600	570	656.67	230	230	235	231.67	175	245	320	246.67	71.58	76.03	67.73	71.78	60.22
1	8	122.1	24.9	16.702	290	292.5	282.5	288.33	305.2	281.8	269.1	285.37	163.85	157.5	166.95	162.77	119	116.7	144.4	126.7	147.5	147.5	148.75	147.92	146.25	145	152.75	148	630	650	670	650	700	620	660	660	690	410	550	550	260	295	475	343.33	90.41	91.42	88.7	90.18	94.57
1	8	126.5	24.9	15.5603	125	129.9	108.4	121.1	109.6	118.6	113.6	113.93	183.2	223.55	170.75	192.5	143.8	204.6	149.7	166.03	89.75	91.5	90	90.42	90.5	85	89.25	88.25	530	540	480	516.67	480	520	510	503.33	930	1040	880	950	530	900	770	733.33	94.97	115.05	93.85	101.29	101.71
1	11	146.4	42.1	19.6426	103.9	102.5	103.9	103.43	105.7	119.8	108.2	111.23	84.45	80.45	75.55	80.15	93.9	101.2	93.4	96.17	96	96	99.25	97.08	93	91.75	97.75	94.17	530	540	520	530	520	590	500	536.67	430	435	405	423.33	470	530	375	458.33	82.51	82.32	79.77	81.53	92
1	15	160.7	46.4	17.9674	165.2	177.3	164	168.83	186.9	174.5	160.8	174.07	113	105.25	135.7	117.98	123.3	125.9	107	118.73	101	107.25	105	104.42	107.75	109.25	107.75	108.25	610	630	600	613.33	660	620	580	620	355	345	460	386.67	405	340	335	360	91.46	82.56	92.29	88.77	90.26
1	11	148.8	36.4	16.4398	85.5	85	78.1	82.87	78.1	79.8	79.6	79.17	99	90.5	106.9	98.8	82.5	107	75.15	88.22	64	69	60.75	64.58	71.5	65.5	71	69.33	680	610	530	606.67	560	600	590	583.33	235	285	520	346.67	295	440	260	331.67	61.11	65.09	87.3	71.17	63.51
1	8	125.5	27.6	17.5235	155.8	168.3	149.5	157.87	162.5	155.3	142.2	153.33	129.4	136	111.4	125.6	137.55	113.35	192	147.63	99.5	101	102	100.83	100.25	99.25	104.25	101.25	680	690	600	656.67	690	660	570	640	320	335	310	321.67	380	300	955	545	66.66	72.55	77.12	72.11	74.85
1	11	146.8	33.3	15.4523	124.3	120.7	119	121.33	132.5	115.7	112.9	120.37	188.05	134.15	115.75	145.98	107.05	127.6	107.55	114.07	71.5	86.5	73.25	77.08	85	74.5	82	80.5	630	570	590	596.67	650	580	570	600	585	355	330	423.33	295	400	265	320	93.36	82.86	84.83	87.02	79.31
1	9	133.5	36	20.1995	97	99.4	93.7	96.7	90.3	97.3	93.8	93.8	137.75	136.4	114.05	129.4	93.55	105.3	107.25	102.03	70.5	74.75	77.75	74.33	80.75	81.75	82.25	81.58	550	590	530	556.67	530	570	560	553.33	495	420	570	495	630	375	425	476.67	81.81	75.48	77.14	78.14	78.11
1	8	134.4	28.8	15.9439	154.6	157.9	172.9	161.8	157.3	169.7	168.2	165.07	103.05	98.6	120.9	107.52	117.5	119.5	126.95	121.32	101.75	110.25	107.5	106.5	115	116	112.5	114.5	510	540	580	543.33	530	560	570	553.33	415	345	380	380	480	390	575	481.67	93.87	81.29	86.59	87.25	92.26
1	11	145.8	36	16.9351	137.8	145.6	148.2	143.87	147.9	126.2	134.9	136.33	96	114.15	104.3	104.82	111.85	109.85	92.9	104.87	96.75	103.75	96	98.83	100.5	99.75	100.5	100.25	600	580	610	596.67	620	530	590	580	310	340	275	308.33	325	300	270	298.33	74.25	79.13	72.78	75.39	75
1	11	142.5	32.1	15.8079	274.1	305.9	308.5	296.17	284.5	285.5	276.9	282.3	103.25	99.65	106.7	103.2	109.55	119.05	113.25	113.95	150	148.5	155.5	151.33	146.25	139.25	149	144.83	600	640	630	623.33	600	610	600	603.33	300	260	325	295	305	405	310	340	90.9	97.52	96.88	95.1	103.05
1	6	122.4	26.6	17.7549	205.5	187.9	199.4	197.6	204	204.2	201.5	203.23	122.55	108.3	109.65	113.5	118.1	132	139.9	130	120.5	120.25	121	120.58	121.25	114.5	110.25	115.33	600	560	590	583.33	620	590	600	603.33	500	335	405	413.33	345	370	385	366.67	98.09	89.18	90.5	92.59	92.47
1	12	154.7	34.2	14.2904	160	146.1	159.9	155.33	158.1	156.7	160.2	158.33	132.45	101.1	99.25	110.93	101.75	101.4	100.9	101.35	111.75	113	114.75	113.17	112.25	117.75	117.5	115.83	640	570	620	610	620	590	570	593.33	385	360	265	336.67	295	395	375	355	73	77.9	81.84	77.58	82.39
1	14	169.5	52.7	18.343	155	154.6	162.9	157.5	160.4	156.5	155.4	157.43	102.75	95.85	113.8	104.13	110.5	98.8	107.7	105.67	101	106.75	98.25	102	104	110.75	102.5	105.75	640	620	620	626.67	600	590	600	596.67	270	315	360	315	335	310	310	318.33	66.11	67.82	73.35	69.09	70.89
1	9	139	32.9	17.0281	170.8	146.6	145.4	154.27	167.2	127.8	146	147	93.95	94.05	88.6	92.2	104.7	97.7	108.5	103.63	115.75	114.75	116.75	115.75	115.5	112.5	118.5	115.5	620	560	530	570	640	480	520	546.67	225	265	365	285	220	440	435	365	69.94	76.39	81.84	76.06	67.77
1	8	135.6	30.3	16.4787	174.3	178.6	181.7	178.2	156	168.5	163.6	162.7	158.75	267.3	221.85	215.97	339.65	332.55	309.2	327.13	119.5	130	140	129.83	123	122	128.25	124.42	560	590	590	580	560	660	640	620	585	765	730	693.33	985	925	880	930	82.7	82.52	85.29	83.5	84.44
1	10	136.7	26.4	14.1276	97.3	90	91.5	92.93	102.6	93.3	93.8	96.57	90.4	76.35	77.95	81.57	85.95	85.4	78.2	83.18	89.5	87.25	93.5	90.08	84.75	92.25	89.25	88.75	550	490	510	516.67	540	520	470	510	425	345	425	398.33	490	260	495	415	79.2	72.23	76.19	75.87	92.85
1	8	129.9	24	14.2231	178.2	169.8	173.3	173.77	166.3	174.1	162.1	167.5	126.65	120.6	126.35	124.53	112.3	124.9	120.7	119.3	109.25	106.5	107.25	107.67	101.25	104.5	99.75	101.83	650	610	640	633.33	610	630	590	610	315	355	350	340	360	445	385	396.67	83.72	88.02	85.21	85.65	88.28
1	10				126.2	130.3	152.6	136.37	150.8	135.3	128.3	138.13	109.2	116.8	137.85	121.28	131.85	129	135	131.95	90.5	86.25	86.5	87.75	85.25	80.5	85.25	83.67	640	610	760	670	790	660	600	683.33	315	340	370	341.67	245	455	400	366.67	74.78	75.86	79.51	76.72	66.73
1	8	137	32.3	17.2092	100.3	86.4	97	94.57	96	87.8	100.4	94.73	81.7	86.85	64.6	77.72	66.9	58.65	72.3	65.95	90.25	101	99.75	97	94.25	95.25	97.5	95.67	610	520	570	566.67	620	500	600	573.33	205	340	200	248.33	155	305	160	206.67	57.31	63.3	56.93	59.18	53.08
1	7	120.4	23.3	16.0732	313.4	294.1	341.3	316.27	296.5	281.2	327.1	301.6	122.75	136.45	203.1	154.1	181.95	146.8	154.1	160.95	152.75	139	128.25	140	124	132	139.75	131.92	650	640	720	670	620	600	690	636.67	375	385	460	406.67	560	380	405	448.33	97.46	100.34	99.68	99.16	108.33
1	11	150.7	33.3	14.6628	168	164.4	151	161.13	152.1	137.9	146.7	145.57	134.65	143.9	153.85	144.13	123.4	129.65	99.6	117.55	92.75	91	101.5	95.08	109.25	100	106	105.08	590	570	550	570	570	540	550	553.33	595	620	565	593.33	425	380	340	381.67	106.75	102.82	95.92	101.83	82.97
1	9	144.4	37.1	17.7926	318	308	337.8	321.27	325.3	332.3	355.6	337.73	193.3	272.9	283.8	250	198.5	192.75	292.7	227.98	149.5	139	139.25	142.58	151.75	152.75	147	150.5	760	740	800	766.67	760	770	840	790	430	775	740	648.33	470	405	680	518.33	86.24	90.6	89.28	88.71	93.27
1	10	145	30.8	14.6492	101.6	97.4	100.5	99.83	105.6	107.5	104.5	105.87	79.25	73.25	69.9	74.13	85.45	75.2	75.75	78.8	95.75	92.25	99.75	95.92	93.5	96.75	97	95.75	540	510	510	520	560	550	530	546.67	325	340	335	333.33	320	270	380	323.33	79.2	76.07	72.11	75.79	75
1	9	149.7	55.7	24.8549	112	104.7	112.2	109.63	112.7	122.1	118.7	117.83	127	109.75	124.45	120.4	93.35	154.2	116.05	121.2	77.25	80.75	73	77	75.75	71	75.75	74.17	660	620	650	643.33	610	650	650	636.67	425	270	320	338.33	325	485	460	423.33	83.38	69.2	79.79	77.46	83.6
1	10	147.1	39.7	18.347	119.8	112.4	114	115.4	116.6	110.4	110.4	112.47	112.15	120.05	105.55	112.58	123.75	115.9	106.25	115.3	110.25	108	116.5	111.58	107.25	106.5	111.5	108.42	570	550	550	556.67	560	530	540	543.33	645	545	380	523.33	650	580	510	580	82.46	79.7	69.74	77.3	91.86
1	8	139.9	33.3	17.0141	262.9	290.4	260.6	271.3	267.8	318.7	283.7	290.07	188.05	161.3	132.2	160.52	178.4	154.75	154.5	162.55	120.5	119.5	113	117.67	116.75	128	128	124.25	730	780	720	743.33	740	840	770	783.33	695	370	355	473.33	405	295	420	373.33	85.19	88.51	76.31	83.34	87.4
1	6	118.3	21.1	15.0769	127.8	122.2	130.1	126.7	136.9	125.4	164.1	142.13	89.3	80.25	93.75	87.77	93.75	85.1	124.55	101.13	98.25	106	95.25	99.83	96.5	97.25	110.5	101.42	640	600	650	630	700	630	750	693.33	225	215	240	226.67	195	200	340	245	63.38	61.58	65.73	63.56	66.21
1	12	170.4	49	16.8755	175.5	168.2	158.8	167.5	177.2	168.1	165	170.1	121.25	108.45	124.75	118.15	125.75	141.2	138.35	135.1	109.25	105.75	108.75	107.92	104.5	94.5	99.25	99.42	630	610	580	606.67	620	610	580	603.33	395	335	360	363.33	430	400	365	398.33	89.49	87.96	79.61	85.69	91.17
1	10				189.6	176.7	180.9	182.4	184.6	186.7	183.3	184.87	151.25	162.45	153.7	155.8	189.7	144.6	139.45	157.92	109.75	104.25	111.75	108.58	110.5	114.75	108.5	111.25	720	670	670	686.67	710	710	680	700	345	395	375	371.67	420	320	330	356.67	78.05	82.12	78.26	79.48	83.2
1	7	120.5	22	15.1513	206.4	209.2	217.2	210.93	236.7	219.1	240.8	232.2	115.25	120.9	156.2	130.78	169.55	170.8	229.4	189.92	115.5	112.75	115.25	114.5	123	118.75	123.25	121.67	810	790	800	800	830	800	870	833.33	270	300	400	323.33	635	400	795	610	69.89	77.13	79.65	75.56	79.8
1	10	142.8	29.1	14.2704	175.6	169.6	175.3	173.5	177.2	173.1	165.4	171.9	172.25	103.55	103.55	126.45	147.4	109.35	106.95	121.23	103	110.75	118.25	110.67	105	105.25	107.5	105.92	700	700	670	690	710	700	670	693.33	385	250	285	306.67	285	230	250	255	85.89	69.07	79.08	78.01	85.8
1	12	157	47.3	19.1894	127.9	112.1	110.4	116.8	125.7	117.3	113.8	118.93	91.85	90.25	79	87.03	108.7	102.05	79.1	96.62	102	93.25	95.25	96.83	102	107	105.25	104.75	640	580	580	600	620	570	570	586.67	275	325	235	278.33	325	340	260	308.33	65	71.06	66	67.35	64.57
1	8				306.7	306.5	287	300.07	312.1	306.9	311.1	310.03	150.05	150.3	147.6	149.32	152.85	131.35	140	141.4	164.25	159.25	153.5	159	175.25	177.75	194	182.33	670	680	660	670	680	650	660	663.33	340	345	375	353.33	500	320	390	403.33	89.97	100.65	89.61	93.41	80.71
1	7	123.9	20.6	13.4191	124	119.4	112.3	118.57	120.3	113.6	123.1	119	106.6	107	117.8	110.47	101.1	89	96.55	95.55	91	89.75	85	88.58	90.5	77	85	84.17	660	620	600	626.67	640	590	640	623.33	280	255	310	281.67	285	255	260	266.67	69.63	68.27	74.91	70.94	69.71
1	14				117.5	109.8	120.7	116	118.8	119.1	126.1	121.33	86.55	81.65	91.7	86.63	83.3	89.8	99.05	90.72	100.25	98	92.75	97	99.5	103.75	102.5	101.92	550	540	610	566.67	590	550	590	576.67	210	230	250	230	195	255	260	236.67	62.04	65.01	68.14	65.06	60.23
1	8	128	29.5	18.0054	122.2	108.2	121.9	117.43	124.2	111.9	120.5	118.87	113.35	98.6	85.35	99.1	142.3	117.85	122.7	127.62	97.25	96.5	97.75	97.17	96	100.5	100	98.83	590	530	580	566.67	580	530	580	563.33	555	480	355	463.33	495	520	550	521.67	73.6	74.25	69.08	72.31	77.67
1	7	125	26.2	16.768	289.5	249.6	238.8	259.3	275.8	253	234.7	254.5	191.55	160.85	145	165.8	141.75	143.15	118.95	134.62	126.5	133.5	144.25	134.75	131.75	138.75	136	135.5	730	610	550	630	710	640	580	643.33	425	415	455	431.67	350	460	340	383.33	97.29	96.9	104.83	99.67	101.79
1	10	145.2	36	17.0753	149	149.6	145.9	148.17	149.1	146	131.3	142.13	85.3	81.35	84.1	83.58	75.15	85.2	62.85	74.4	105.5	98.5	110.75	104.92	101.75	103.75	105.75	103.75	660	670	640	656.67	680	640	600	640	325	200	275	266.67	165	210	180	185	73.6	61.45	69.55	68.2	65.92
1	6	110.4	18.3	15.0146	170.6	169.7	184.5	174.93	161.6	179.2	186.6	175.8	89.55	98.45	92.1	93.37	166.4	91.3	174.95	144.22	121	115.75	110.75	115.83	109.25	110.75	104.25	108.08	620	610	680	636.67	620	620	690	643.33	185	290	200	225	520	225	620	455	69.83	70.68	71.87	70.79	73.2
1	8	125.8	21.6	13.6487	128.9	144.4	137.4	136.9	146.3	134.9	131.6	137.6	142.2	138.75	116.05	132.33	112.65	109.5	117.55	113.23	92	97.75	104.5	98.08	99.25	103.5	102	101.58	530	560	530	540	580	540	510	543.33	385	440	425	416.67	345	370	355	356.67	79.69	93.15	86.03	86.29	82.71
1	10	147.6	38.5	17.6721	710.9	635.6	666.5	671	701.1	665.2	687	684.43	486.4	310.95	481.65	426.33	413.75	379.45	433.15	408.78	174.75	177.25	165.5	172.5	176.75	188	186.25	183.67	960	890	940	930	970	890	960	940	940	825	1100	955	880	860	910	883.33	117.13	110.71	119.67	115.84	119.07
1	7	135.4	29.6	16.1456	202	203.3	203.2	202.83	186.9	199.7	202.5	196.37	196.5	215.65	139.25	183.8	126.35	194.55	131.75	150.88	103.5	108.5	127.25	113.08	120	109.25	126.5	118.58	680	680	680	680	640	670	680	663.33	445	510	390	448.33	410	520	410	446.67	87.26	88.57	83.02	86.28	87.93
1	11	159.2	43.8	17.2818	179.3	183.7	200.8	187.93	189.8	165.8	182.1	179.23	144.7	118.55	135.1	132.78	176.25	116.05	150.6	147.63	100.5	116.5	120	112.33	98.25	116.25	114.75	109.75	690	670	720	693.33	710	630	700	680	300	390	370	353.33	435	310	355	366.67	75.06	77.09	72.47	74.87	80.25
1	13	158.9	34.7	13.743	175	165.7	173.4	171.37	167.5	163.1	176.8	169.13	127.8	134.9	132.15	131.62	134	143.35	123.95	133.77	92.25	85.25	90.25	89.25	98	93.5	100.5	97.33	720	680	740	713.33	690	690	690	690	300	320	290	303.33	310	375	330	338.33	76.17	79.53	77.26	77.65	79.41
1	10	144.2	38	18.2748	283	269	275.4	275.8	268.4	271.3	269.7	269.8	148.1	166	270.8	194.97	220.15	184.5	260.9	221.85	121.75	113.75	129.75	121.75	131.25	116.75	129.5	125.83	660	640	660	653.33	640	660	650	650	460	495	765	573.33	580	420	760	586.67	84.52	87.93	85.06	85.84	96.51
1	6	121	24	16.3923	254.3	262.9	205.2	240.8	252.7	231	216	233.23	224.65	170.45	144.05	179.72	274.35	199.3	148.25	207.3	120.75	125.25	129.5	125.17	117	126	121.5	121.5	800	800	640	746.67	810	800	670	760	475	365	465	435	605	595	485	561.67	78.45	80.69	84.33	81.16	80.07
1	10	145.1	35	16.6239	119.9	112.5	87.4	106.6	113.1	95.7	96.1	101.63	88.25	91.45	70.15	83.28	96.2	98.5	80.85	91.85	88.75	81.25	87.5	85.83	87.5	78.5	80.25	82.08	640	600	470	570	600	500	490	530	235	260	310	268.33	320	485	370	391.67	64.66	67.29	64.94	65.63	67.17
1	8	137	36.5	19.447	264.2	259.3	288	270.5	276.2	260.5	297.9	278.2	136.75	139.55	150.65	142.32	126.4	130.25	132.8	129.82	135.75	143.25	133.75	137.58	128.5	126	146	133.5	690	670	740	700	690	660	750	700	300	425	410	378.33	295	375	270	313.33	86.48	82.85	84.81	84.71	91.72
1	9	134.9	33	18.1339	124	130.6	124.9	126.5	136	132.6	130.7	133.1	85.25	86.4	102.4	91.35	96.7	82.6	89.6	89.63	109	115.75	121.5	115.42	131	123.5	121.75	125.42	560	580	550	563.33	570	570	580	573.33	590	595	390	525	370	565	410	448.33	82.83	81.83	69.77	78.14	76.34
1	7	130	27.2	16.0947	326.4	324.6	326	325.67	367.8	346.1	345.2	353.03	232.05	260.8	196.35	229.73	222.95	232.9	236.35	230.73	147.5	134.25	138.75	140.17	144.5	153.5	151.5	149.83	840	730	730	766.67	840	760	750	783.33	465	580	480	508.33	415	485	545	481.67	95.62	100.74	97.14	97.8333	94.24
1	9	145	35.9	17.0749	128.7	132	113	124.57	118.1	123.2	110.6	117.3	84.75	114.15	84	94.3	84.15	82.9	72.8	79.95	105.25	85.75	100.5	97.17	103.25	100.75	104.25	102.75	610	670	550	610	600	620	560	593.33	220	505	275	333.33	215	355	230	266.67	59.87	97.07	72.43	76.46	62.29
1	10	139.9	31.9	16.2988	223.4	211.1	201.6	212.03	198.5	238	214.7	217.07	133.4	123.25	137.4	131.35	133.05	127.15	148.55	136.25	122.25	121.5	121	121.58	125.25	130	129	128.08	620	600	600	606.67	580	660	620	620	355	340	415	370	455	360	440	418.33	86.5	90.82	84.95	87.42	86.83
1	10	145.4	39.1	18.4947	154.4	180.9	169.9	168.4	187.4	181.9	184.5	184.6	116.7	106.35	106.6	109.88	156.55	140.35	141.4	146.1	116.75	127.25	116.25	120.08	112.25	118.75	116	115.67	560	640	600	600	650	610	640	633.33	410	350	380	380	705	700	610	671.67	87.62	77.34	83.84	82.93	89.24
1	10	154.4	35	14.6816	235.7	237	232.4	235.03	265.4	259.7	224.4	249.83	187.4	193.8	241.2	207.47	217.05	219.8	205.9	214.25	103.25	107.75	107.5	106.17	103.5	109.5	101.25	104.75	810	810	840	820	880	800	770	816.67	490	400	895	595	370	545	550	488.33	81.34	85.66	88.31	85.1	89.77
1	13	171	56.4	19.288	115.5	118.1	119.1	117.57	131.5	141.3	112	128.27	103.15	156.7	126	128.62	143.5	134.2	113.9	130.53	83	87.25	87.75	86	86	90.25	93	89.75	600	580	590	590	650	680	580	636.67	310	530	445	428.33	470	475	515	486.67	70.24	86.91	82.86	80	88.37
1	9	154.2	41.8	17.5795	363.3	387	387.8	379.37	396.4	376.9	439.5	404.27	132.9	131.25	138.45	134.2	141.4	164.9	211.7	172.67	161.5	171.5	175.75	169.58	174.5	189	193.5	185.67	710	740	740	730	860	750	850	820	310	280	340	310	245	425	480	383.33	95.8	86.01	92.29	91.37	84.41
1	10	128	25.8	15.7471	176.2	163.6	174.3	171.37	182.4	183.7	185.4	183.83	157.65	114.25	136.8	136.23	166.05	117.5	140.7	141.42	108.5	110.5	93.5	104.17	109.5	116.25	112.25	112.67	660	590	640	630	650	590	670	636.67	455	475	410	446.67	520	450	410	460	61.56	75.93	69.1	68.86	86.48
1	7	130.9	36.8	21.4767	163.5	167.6	174.4	168.5	170.5	156.3		163.4	158.8	159.7	113.35	143.95	121.25	123.5		122.38	101.25	110	115	108.75	113.75	109		111.38	600	590	610	600	630	590		610	540	530	355	475	390	485		437.5	79.36	73.99	81.1	78.15	72.42
1	9	152.5	36.8	15.8237	122.6	121.7	118.7	121	107.1	128.8	104.1	113.33	104.15	102.5	112	106.22	104.05	84.7	58.85	82.53	88.5	83.5	93	88.33	89.25	91.5	99	93.25	670	690	620	660	600	680	550	610	280	240	340	286.67	280	270	185	245	61.69	60.36	61.92	61.32	60.95
1	10	141.9	37.1	18.4251	105.3	95.8	102.1	101.07	96.4	98	94.3	96.23	86.3	95.35	105.9	95.85	104.7	111.3	81.6	99.2	82.5	79	81.25	80.92	77	80	88.5	81.83	530	480	500	503.33	540	500	470	503.33	295	365	395	351.67	305	360	390	351.67	79.5	85.93	84.51	83.31	75.65
1	10	132	29.3	16.8159	126.5	139	130.5	132	129.6	129.6	135.7	131.63	84.05	92	78.25	84.77	85.4	100.05	84.8	90.08	98.5	103	100	100.5	103.5	96.5	110	103.33	580	600	570	583.33	570	560	590	573.33	240	275	255	256.67	275	530	280	361.67	68.49	69.84	65.43	67.92	70.37
[truncated: 41 more columns]
